# Supplementary material for: The Induction of Long-Term Potentiation by Medial Septum Activation under Urethane Anesthesia Can Alter Gene Expression in the Hippocampus
Source: Int J Mol Sci. 2023 Aug 19;24(16):12970. doi: 10.3390/ijms241612970 (PMC10454684; doi:10.3390/ijms241612970)
Supplement: Supplementary file 1 [file ijms-24-12970-s001.zip › Suppl_Table_1.xlsx]

## Sheet: Лист1
ENSEMBL	baseMean	log2FoldChange	lfcSE	stat	p-value	padj	SYMBOL
ENSRNOG00000009577	252.674	-0.968832	0.246149	-3.93596	8.28662e-05	0.41031	Ndst4
ENSRNOG00000009779	13.4715	3.383	0.831273	4.06966	4.70826e-05	0.41031	Krt8
ENSRNOG00000012705	55.7089	1.56996	0.396745	3.95709	7.58681e-05	0.41031	Pcgf2
ENSRNOG00000002525	244.752	-0.761924	0.199073	-3.82736	0.000129525	0.41031	Ptgs2
ENSRNOG00000057855	10.978	6.10331	1.54126	3.95996	7.49634e-05	0.41031	F5
ENSRNOG00000039463	29.6319	-1.9911	0.521833	-3.81558	0.000135864	0.41031
ENSRNOG00000000306	236.14	0.907653	0.234316	3.87363	0.000107227	0.41031	Smpd2
ENSRNOG00000019902	18.8408	2.86161	0.816209	3.50598	0.000454933	0.605541	Folr1
ENSRNOG00000070871	251.719	-4.05775	1.11469	-3.64024	0.000272387	0.605541	LOC120101355
ENSRNOG00000052444	173.789	-1.32902	0.367725	-3.61417	0.000301312	0.605541	Samd9
ENSRNOG00000015550	1479.98	0.742654	0.210186	3.53332	0.000410377	0.605541	Ptgds
ENSRNOG00000065922	11.4485	-3.51046	0.972869	-3.60836	0.000308143	0.605541	RGD1564278
ENSRNOG00000021919	26.0669	-1.86165	0.533818	-3.48743	0.000487689	0.605541	Rhoj
ENSRNOG00000003183	21.5968	2.16048	0.622164	3.47252	0.000515597	0.605541	Fmod
ENSRNOG00000005229	19.2837	2.27449	0.653767	3.47905	0.000503191	0.605541	Sec16b
ENSRNOG00000013720	173.384	1.1057	0.312534	3.53786	0.000403377	0.605541	Aebp1
ENSRNOG00000018087	281.993	0.921197	0.263061	3.50184	0.000462057	0.605541	Vim
ENSRNOG00000063531	66.6692	-1.52161	0.423259	-3.59498	0.000324418	0.605541
ENSRNOG00000026870	11.5358	3.91713	1.13681	3.44571	0.000569559	0.633709	Clic6
ENSRNOG00000059295	232.001	-0.696907	0.204487	-3.40807	0.000654238	0.691529	Selenoi
ENSRNOG00000005404	2571.47	-0.496462	0.146983	-3.37769	0.000730967	0.715818	Rasgrp1
ENSRNOG00000007628	357.153	0.738897	0.219096	3.37248	0.000744938	0.715818	Ptp4a3
ENSRNOG00000054458	243.151	0.746647	0.222734	3.35219	0.000801761	0.724508	Kcnmb4
ENSRNOG00000046479	76.9394	1.03416	0.309158	3.3451	0.000822525	0.724508	Chaf1a
ENSRNOG00000004029	12.482	-2.76624	0.838315	-3.29976	0.000967687	0.757663	Nectin4
ENSRNOG00000067437	129.683	-1.0533	0.318748	-3.30448	0.000951528	0.757663	Snurf-ps2
ENSRNOG00000020084	83.3868	0.995286	0.300488	3.31223	0.000925539	0.757663	Pcdhb5
ENSRNOG00000018969	90.5873	1.14526	0.350958	3.26323	0.0011015	0.780614	Gpatch4
ENSRNOG00000022565	5.8656	5.18517	1.58975	3.26162	0.00110778	0.780614	Lrrc25
ENSRNOG00000020073	44.7984	-1.43432	0.438155	-3.27355	0.00106205	0.780614	Pcdhb8
ENSRNOG00000037668	23.2542	1.90148	0.58704	3.2391	0.00119909	0.817701	Ccdc162
ENSRNOG00000067371	12.7631	-3.21633	1.00962	-3.18568	0.00144413	0.847932	LOC120100244
ENSRNOG00000019120	51.1233	1.41017	0.446947	3.1551	0.00160441	0.847932	Hmgcs2
ENSRNOG00000028805	8.82699	3.20693	1.01011	3.17482	0.00149928	0.847932	Cfap77
ENSRNOG00000058692	18.433	-2.03199	0.633565	-3.20724	0.00134017	0.847932	Slc26a4
ENSRNOG00000004496	1077.02	-0.526255	0.166169	-3.16699	0.00154024	0.847932	Rock2
ENSRNOG00000030264	37.9248	1.37028	0.433852	3.1584	0.00158636	0.847932	Fam83h
ENSRNOG00000029958	131.509	0.922689	0.292315	3.15648	0.00159684	0.847932	RGD1563861
ENSRNOG00000068887	742.396	0.507222	0.158574	3.19865	0.00138075	0.847932	Ddt
ENSRNOG00000056978	218.217	-0.800904	0.251058	-3.19012	0.00142214	0.847932	LOC120096111
ENSRNOG00000010378	16.3272	6.69678	2.13688	3.1339	0.00172498	0.862065	Slc4a5
ENSRNOG00000000185	132.195	0.85019	0.272192	3.12349	0.00178718	0.862065	Mpst
ENSRNOG00000060984	20.0331	1.91085	0.613297	3.11571	0.00183505	0.862065	Dnah7
ENSRNOG00000016133	238.01	-0.676956	0.217253	-3.11598	0.00183335	0.862065	Sumo1
ENSRNOG00000019143	594.308	0.499306	0.159845	3.1237	0.00178593	0.862065	Galnt2
ENSRNOG00000001416	478.178	-0.643982	0.207343	-3.10588	0.00189717	0.871872	Vgf
ENSRNOG00000047455	5.23527	5.01625	1.63342	3.07101	0.00213335	0.959553	Cdhr3
ENSRNOG00000020614	12.9974	2.88597	0.94369	3.05818	0.00222684	0.960724	Phlda2
ENSRNOG00000019069	260.003	-0.655803	0.214409	-3.05866	0.0022233	0.960724	Nxf1
ENSRNOG00000013036	455.643	0.599033	0.196628	3.04653	0.00231496	0.978767	Epha8
ENSRNOG00000059502	22.3376	-2.07282	0.681899	-3.03978	0.0023675	0.981353	LOC120103252
ENSRNOG00000018991	1415.12	0.671187	0.222943	3.01057	0.00260758	0.986321	Gsn
ENSRNOG00000014635	449.842	0.528717	0.175104	3.01945	0.00253234	0.986321	Clta
ENSRNOG00000022934	585.213	0.613553	0.203079	3.02125	0.00251736	0.986321	Rps2-ps6
ENSRNOG00000022256	5.19951	4.99964	1.65676	3.01772	0.00254683	0.986321	Cxcl10
ENSRNOG00000011316	9.14523	3.46177	1.1501	3.00997	0.00261277	0.986321	Fam167a
ENSRNOG00000066169	1.16864	-0.770683	2.58303	-0.298364	0.765425	0.991763
ENSRNOG00000018029	18.0423	-0.484629	0.659553	-0.734783	0.462472	0.991763	Doc2g
ENSRNOG00000031391	2.40037	2.93382	1.87923	1.56119	0.11848	0.991763	Ceacam16
ENSRNOG00000068698	10.9665	0.0820321	0.738463	0.111085	0.911549	0.991763
ENSRNOG00000067904	2.07462	1.03567	1.81497	0.570627	0.568253	0.991763	LOC120100281
ENSRNOG00000064851	5.68697	-0.354299	1.08834	-0.325541	0.744772	0.991763
ENSRNOG00000032625	80.0398	0.313918	0.327924	0.957288	0.338422	0.991763	Zfp108
ENSRNOG00000029315	7.8603	-0.77296	0.921081	-0.839188	0.401364	0.991763	LOC690251
ENSRNOG00000016356	1458.32	0.0746897	0.141826	0.52663	0.598451	0.991763	Got1
ENSRNOG00000015810	5.99024	0.598576	1.15316	0.519076	0.603707	0.991763	Trip13
ENSRNOG00000017538	13.6959	0.5063	0.706728	0.716401	0.473744	0.991763	Lrrc27
ENSRNOG00000027204	476.022	0.0502789	0.217946	0.230694	0.817552	0.991763	Map6
ENSRNOG00000070886	0.354195	0.402201	4.07904	0.0986019	0.921454	0.991763
ENSRNOG00000035453	2.72368	-3.61922	1.86522	-1.94037	0.0523345	0.991763	Mir3596c
ENSRNOG00000014903	641.013	0.162457	0.156803	1.03606	0.300175	0.991763	Zfyve27
ENSRNOG00000021051	281.409	0.0742044	0.23249	0.319172	0.749596	0.991763	Cyth2
ENSRNOG00000055569	586.491	-0.764851	0.535724	-1.4277	0.153379	0.991763	Snord14b
ENSRNOG00000011160	2298.96	-0.144144	0.142362	-1.01252	0.31129	0.991763	Sv2b
ENSRNOG00000063599	0.993916	-0.451186	2.71477	-0.166197	0.868002	0.991763
ENSRNOG00000017748	64.309	0.316394	0.384256	0.823394	0.410284	0.991763	Nkx6-2
ENSRNOG00000067237	1.03196	-0.422276	2.54981	-0.165611	0.868463	0.991763
ENSRNOG00000016227	185.548	-0.0620021	0.235106	-0.26372	0.791996	0.991763	Glrx3
ENSRNOG00000070826	0.326927	-1.62121	4.02491	-0.402793	0.6871	0.991763	Rnu6-26
ENSRNOG00000013395	0.738659	1.88141	3.09881	0.60714	0.543758	0.991763	Pglyrp1
ENSRNOG00000016906	10.4299	-1.54332	0.975371	-1.58229	0.113583	0.991763	Lipt2
ENSRNOG00000069365	3.17576	1.11762	1.52345	0.733613	0.463185	0.991763
ENSRNOG00000036303	0.765303	2.05287	3.04198	0.674844	0.499775	0.991763	Mir343
ENSRNOG00000067171	0.70839	0.673945	3.4194	0.197094	0.843754	0.991763
ENSRNOG00000052293	4.55792	-1.09988	1.19111	-0.923408	0.355795	0.991763	Snord15a
ENSRNOG00000027582	332.949	0.345524	0.242878	1.42262	0.154845	0.991763	Dpysl4
ENSRNOG00000009830	81.2787	0.30487	0.318853	0.956144	0.339	0.991763	Fam204a
ENSRNOG00000012742	0.220873	1.36397	4.07904	0.334385	0.738089	0.991763	Irx2
ENSRNOG00000069837	1.10931	-3.40951	3.12328	-1.09164	0.27499	0.991763
ENSRNOG00000069135	116.513	0.650551	0.34765	1.87128	0.0613058	0.991763	Snord97
ENSRNOG00000064137	13.6945	0.79891	0.687572	1.16193	0.245264	0.991763
ENSRNOG00000064435	3.86077	1.30335	1.43954	0.905392	0.365258	0.991763	LOC120100317
ENSRNOG00000013767	67.0681	0.202029	0.32733	0.617203	0.537101	0.991763	Ccdc61
ENSRNOG00000067619	7.58003	1.04184	1.07211	0.97176	0.33117	0.991763
ENSRNOG00000062791	1.91467	-0.783602	2.13898	-0.366343	0.714109	0.991763	LOC120100287
ENSRNOG00000018408	159.465	-0.151409	0.243698	-0.621295	0.534405	0.991763	RGD1307554
ENSRNOG00000064960	1.4532	-0.381128	2.38601	-0.159735	0.87309	0.991763	LOC120100254
ENSRNOG00000016421	2.03909	-1.33871	1.92856	-0.694151	0.487588	0.991763	Tyr
ENSRNOG00000018334	72.7013	-0.386275	0.378256	-1.0212	0.30716	0.991763	Ctu1
ENSRNOG00000067907	63.7504	0.118482	0.359481	0.329592	0.741709	0.991763
ENSRNOG00000014726	2.86371	1.96296	1.59013	1.23447	0.217029	0.991763	Acsm4
ENSRNOG00000063196	1.55401	-2.68785	2.38655	-1.12625	0.26006	0.991763
ENSRNOG00000051969	24.6836	-0.894248	0.642768	-1.39125	0.164151	0.991763	Snora29
ENSRNOG00000023407	75.8347	0.255456	0.351525	0.726707	0.467405	0.991763	Mrpl36
ENSRNOG00000010529	11.0493	-1.31838	0.799038	-1.64995	0.0989525	0.991763	Thbs2
ENSRNOG00000012684	120.307	-0.272596	0.255814	-1.0656	0.286605	0.991763	Bloc1s2
ENSRNOG00000014258	7.79497	1.72097	1.22044	1.41013	0.158503	0.991763	Rab32
ENSRNOG00000066483	5.45207	-2.25405	1.32555	-1.70046	0.0890439	0.991763	LOC120100319
ENSRNOG00000051780	0.575195	2.84527	3.64763	0.780033	0.435372	0.991763	LOC120100462
ENSRNOG00000067027	0.271985	-1.3897	4.0451	-0.34355	0.731184	0.991763	LOC108349691
ENSRNOG00000035560	0.266643	-1.36505	4.04744	-0.337263	0.735919	0.991763	Mir150
ENSRNOG00000053838	5.3721	-0.728578	1.13669	-0.640966	0.521545	0.991763	LOC120100288
ENSRNOG00000063945	0.163464	-0.569836	4.08047	-0.139649	0.888937	0.991763	Mir6317-1
ENSRNOG00000063945	0.163464	-0.569836	4.08047	-0.139649	0.888937	0.991763	Mir6317-2
ENSRNOG00000066101	0.266643	-1.36505	4.04744	-0.337263	0.735919	0.991763	LOC100911574
ENSRNOG00000065242	0.682887	-0.46524	3.44964	-0.134866	0.892718	0.991763
ENSRNOG00000063217	1.13411	-3.43958	2.83993	-1.21115	0.225839	0.991763	Raet1ll1
ENSRNOG00000036631	4.02912	-0.684647	1.36862	-0.500245	0.616902	0.991763	Ptgdr2
ENSRNOG00000066494	5.91031	-1.84538	1.1316	-1.63077	0.102938	0.991763	LOC120100331
ENSRNOG00000059820	0.59357	-2.4993	3.5776	-0.698596	0.484804	0.991763	LOC120100360
ENSRNOG00000049846	8.38304	-1.3518	1.01071	-1.33747	0.181068	0.991763	Mir344g
ENSRNOG00000065570	0.354322	2.15853	4.04916	0.53308	0.593978	0.991763	LOC120100463
ENSRNOG00000020318	95.0267	0.552957	0.289799	1.90807	0.0563819	0.991763	Pnkp
ENSRNOG00000047406	16.2565	0.952114	0.793505	1.19988	0.230184	0.991763	Cfap90
ENSRNOG00000050445	749.052	-0.0744395	0.151636	-0.490908	0.623491	0.991763	Gde1
ENSRNOG00000035565	3.24576	4.2977	1.87784	2.28864	0.0221003	0.991763	Mir330
ENSRNOG00000016597	2.07107	2.45866	2.05178	1.1983	0.2308	0.991763
ENSRNOG00000064367	0.220873	1.36397	4.07904	0.334385	0.738089	0.991763	LOC120100237
ENSRNOG00000068454	0.231637	1.36397	4.07904	0.334385	0.738089	0.991763	LOC120100121
ENSRNOG00000068454	0.231637	1.36397	4.07904	0.334385	0.738089	0.991763	LOC120100122
ENSRNOG00000018953	1.19152	-2.24854	2.85111	-0.788655	0.430314	0.991763	Cblc
ENSRNOG00000069628	3.81203	1.80128	1.44878	1.24331	0.213755	0.991763
ENSRNOG00000065292	0.220873	1.36397	4.07904	0.334385	0.738089	0.991763
ENSRNOG00000068976	0.231637	1.36397	4.07904	0.334385	0.738089	0.991763
ENSRNOG00000013945	94.4666	0.121382	0.29616	0.409854	0.681913	0.991763	Itpkc
ENSRNOG00000070203	2.90696	-0.927952	1.77212	-0.52364	0.600529	0.991763	LOC120100293
ENSRNOG00000040447	0.463273	2.50636	4.01923	0.62359	0.532897	0.991763	Mir708
ENSRNOG00000031947	10.1592	0.202469	0.796429	0.254221	0.799325	0.991763	LOC100361060
ENSRNOG00000016565	44.4787	0.487859	0.392307	1.24357	0.21366	0.991763	Zfp524
ENSRNOG00000066104	1.0982	1.40296	2.5048	0.560108	0.575406	0.991763
ENSRNOG00000019138	127.053	-0.118722	0.293623	-0.404334	0.685967	0.991763	Clec11a
ENSRNOG00000065052	2.66134	0.658703	1.60544	0.410296	0.681589	0.991763	LOC120100259
ENSRNOG00000035572	0.498533	2.65741	3.85379	0.689557	0.490473	0.991763	Mir125a
ENSRNOG00000069359	0.365085	2.19387	4.04579	0.542259	0.58764	0.991763
ENSRNOG00000069866	0.933252	-3.16374	3.32194	-0.952377	0.340906	0.991763	LOC120100411
ENSRNOG00000065649	43.419	0.382267	0.408578	0.935603	0.349478	0.991763	Zfp94
ENSRNOG00000066961	0.3951	0.402201	4.07904	0.0986019	0.921454	0.991763
ENSRNOG00000068275	5.48964	-0.766134	1.32712	-0.577289	0.563744	0.991763	LOC120100277
ENSRNOG00000056667	0.231637	1.36397	4.07904	0.334385	0.738089	0.991763	LOC120100450
ENSRNOG00000064785	0.266897	1.91492	4.06073	0.47157	0.637234	0.991763	LOC120100409
ENSRNOG00000064423	11.4545	0.508139	0.8545	0.594662	0.552069	0.991763	LOC685793
ENSRNOG00000016574	125.673	0.0544989	0.273294	0.199415	0.841938	0.991763	Fiz1
ENSRNOG00000055971	20.139	-0.491868	0.645601	-0.761877	0.446134	0.991763
ENSRNOG00000060473	0.365085	2.19387	4.04579	0.542259	0.58764	0.991763	LOC120100368
ENSRNOG00000055608	117.983	0.170044	0.29429	0.57781	0.563392	0.991763	LOC102548695
ENSRNOG00000064687	0.138663	-0.569836	4.08047	-0.139649	0.888937	0.991763
ENSRNOG00000013641	16.1588	0.226378	0.867704	0.260893	0.794175	0.991763	Myo7a
ENSRNOG00000020347	382.814	0.0884076	0.181029	0.488362	0.625294	0.991763	Nup98
ENSRNOG00000065259	18.2909	-0.657558	0.693463	-0.948224	0.343015	0.991763
ENSRNOG00000068222	3.46805	2.81114	1.47604	1.90452	0.0568426	0.991763	LOC100910657
ENSRNOG00000025953	0.133322	-0.569836	4.08047	-0.139649	0.888937	0.991763	LOC681006
ENSRNOG00000066571	2.95303	1.32731	1.54072	0.86149	0.388968	0.991763
ENSRNOG00000068350	0.490391	-2.21286	3.98558	-0.555216	0.578747	0.991763
ENSRNOG00000061525	0.326927	-1.62121	4.02491	-0.402793	0.6871	0.991763	RGD1562011
ENSRNOG00000016608	30.3262	-0.500268	0.500888	-0.998763	0.317909	0.991763	Zfp579
ENSRNOG00000012730	71.2061	0.352893	0.342797	1.02945	0.303268	0.991763	Lrrk1
ENSRNOG00000018117	895.854	0.113618	0.148861	0.763245	0.445317	0.991763	Ndufv1
ENSRNOG00000067136	1.42185	0.420944	2.07478	0.202886	0.839224	0.991763	LOC120100284
ENSRNOG00000068720	1.45582	-2.69905	2.4317	-1.10994	0.267024	0.991763
ENSRNOG00000016362	15.3025	0.79514	0.7409	1.07321	0.283178	0.991763	Gpr4
ENSRNOG00000017307	237.971	0.0592312	0.307018	0.192924	0.847018	0.991763	Prss23
ENSRNOG00000067915	1.11148	-0.291451	2.44305	-0.119298	0.905039	0.991763	LOC108349187
ENSRNOG00000020942	9.95908	0.113402	0.840591	0.134908	0.892685	0.991763	Plekha4
ENSRNOG00000065481	8.16407	1.79974	1.08604	1.65715	0.0974893	0.991763	LOC120100272
ENSRNOG00000067817	0.43036	0.95314	4.06073	0.234721	0.814425	0.991763
ENSRNOG00000017749	0.231637	1.36397	4.07904	0.334385	0.738089	0.991763	Nkg7
ENSRNOG00000017079	893.315	-0.20012	0.164175	-1.21894	0.222866	0.991763	Pgm2l1
ENSRNOG00000017795	239.633	0.236357	0.232435	1.01687	0.309215	0.991763	Hspbp1
ENSRNOG00000061338	7.10504	-0.915027	0.966267	-0.946971	0.343654	0.991763	LOC120100276
ENSRNOG00000052788	0.354322	2.15853	4.04916	0.53308	0.593978	0.991763	LOC120100357
ENSRNOG00000063641	0.968862	-2.04556	2.60254	-0.785986	0.431876	0.991763	LOC120100292
ENSRNOG00000052319	40.4008	0.302863	0.459647	0.658905	0.509957	0.991763
ENSRNOG00000035639	0.133322	-0.569836	4.08047	-0.139649	0.888937	0.991763	Mir107
ENSRNOG00000027542	48.3517	0.72785	0.446282	1.63092	0.102907	0.991763	LOC100302465
ENSRNOG00000065457	54.6276	-0.539827	0.391802	-1.37781	0.168263	0.991763
ENSRNOG00000061755	0.503748	1.23212	3.59078	0.343134	0.731498	0.991763	LOC120100355
ENSRNOG00000021478	39.4205	-0.24462	0.511263	-0.478462	0.632321	0.991763	Tpd52l1
ENSRNOG00000017330	2.15715	-1.6978	2.00452	-0.84699	0.397001	0.991763
ENSRNOG00000069157	8.41916	-1.12562	0.933174	-1.20622	0.227731	0.991763	Chchd4-ps1
ENSRNOG00000068228	1.01619	1.29816	2.3965	0.541689	0.588033	0.991763	LOC120100268
ENSRNOG00000070519	56.5222	-0.336595	0.394431	-0.853369	0.393455	0.991763
ENSRNOG00000067269	0.231637	1.36397	4.07904	0.334385	0.738089	0.991763
ENSRNOG00000059329	1.89195	-1.46491	1.85865	-0.788157	0.430605	0.991763	LOC120100156
ENSRNOG00000015230	73.6138	-0.307942	0.359465	-0.856668	0.391629	0.991763	Ermard
ENSRNOG00000017069	474.398	-0.134095	0.165847	-0.808548	0.418775	0.991763	Mark4
ENSRNOG00000021013	71.7355	0.294508	0.311743	0.944713	0.344805	0.991763	Stx3
ENSRNOG00000066830	10.3257	-0.676589	0.796516	-0.849436	0.395638	0.991763
ENSRNOG00000061678	1.55036	1.4883	2.31266	0.643547	0.519869	0.991763	Snord100
ENSRNOG00000059948	7.09987	-0.8075	0.946302	-0.853322	0.393481	0.991763	LOC120100266
ENSRNOG00000018677	392.065	0.268464	0.175764	1.52741	0.12666	0.991763	Akt2
ENSRNOG00000070554	0.365085	2.19387	4.04579	0.542259	0.58764	0.991763
ENSRNOG00000054517	2.76175	-2.96366	2.01257	-1.47257	0.140867	0.991763	Snora33
ENSRNOG00000063145	18.8419	0.877106	0.619724	1.41532	0.156975	0.991763
ENSRNOG00000069038	3.92701	-1.3557	1.47994	-0.91605	0.359641	0.991763	LOC120100240
ENSRNOG00000066733	0.133322	-0.569836	4.08047	-0.139649	0.888937	0.991763	LOC120100420
ENSRNOG00000019207	6531.08	-0.119861	0.13476	-0.889443	0.373765	0.991763	Shank1
ENSRNOG00000018394	0.163464	-0.569836	4.08047	-0.139649	0.888937	0.991763	Chrdl2
ENSRNOG00000070234	34.1461	-0.080879	0.456815	-0.17705	0.859469	0.991763	Zfp141
ENSRNOG00000068834	1.12589	3.79482	2.82191	1.34477	0.178699	0.991763
ENSRNOG00000063629	6.51459	-0.505695	1.01485	-0.498296	0.618276	0.991763
ENSRNOG00000016714	11.5441	0.409171	0.78887	0.518679	0.603984	0.991763	Nrap
ENSRNOG00000070270	2.87085	1.70649	1.6758	1.01831	0.308529	0.991763
ENSRNOG00000068102	3.16901	0.359353	1.67909	0.214016	0.830535	0.991763	LOC120100280
ENSRNOG00000067645	1.99609	-0.214574	2.12246	-0.101097	0.919474	0.991763
ENSRNOG00000067256	5.39799	-2.00412	1.18164	-1.69605	0.089877	0.991763
ENSRNOG00000015734	402.583	-0.335592	0.232681	-1.44228	0.149222	0.991763	Ube3a
ENSRNOG00000052832	0.43036	0.95314	4.06073	0.234721	0.814425	0.991763	LOC120100391
ENSRNOG00000068800	122.116	-0.135665	0.261882	-0.518041	0.60443	0.991763
ENSRNOG00000066170	0.765303	2.05287	3.04198	0.674844	0.499775	0.991763	LOC120100402
ENSRNOG00000062681	7.85435	1.20872	1.05038	1.15075	0.249835	0.991763
ENSRNOG00000066273	4.59152	-0.415845	1.14582	-0.362922	0.716663	0.991763	LOC120100241
ENSRNOG00000069276	78.0058	-0.331015	0.34865	-0.949419	0.342407	0.991763	LOC102548320
ENSRNOG00000059393	0.133322	-0.569836	4.08047	-0.139649	0.888937	0.991763	LOC120100161
ENSRNOG00000062961	0.326927	-1.62121	4.02491	-0.402793	0.6871	0.991763
ENSRNOG00000054452	0.364958	0.402201	4.07904	0.0986019	0.921454	0.991763	LOC120100374
ENSRNOG00000064145	0.133448	1.34798	4.07966	0.330416	0.741086	0.991763
ENSRNOG00000027808	1.68673	3.26836	2.38134	1.37249	0.169911	0.991763	Lilra5
ENSRNOG00000049772	26.1121	0.572111	0.604519	0.946391	0.343949	0.991763	Gemin7
ENSRNOG00000053859	227.968	-0.384973	0.215993	-1.78234	0.0746936	0.991763	Ranbp6
ENSRNOG00000066647	7.03214	0.19889	0.981513	0.202636	0.83942	0.991763
ENSRNOG00000066887	17.0941	-0.360777	0.67557	-0.534033	0.593319	0.991763
ENSRNOG00000053929	29.2794	-0.403225	0.645205	-0.624956	0.532	0.991763
ENSRNOG00000018915	10.2091	-0.751363	0.925488	-0.811856	0.416874	0.991763	Tagap
ENSRNOG00000051409	0.220873	1.36397	4.07904	0.334385	0.738089	0.991763	LOC120100372
ENSRNOG00000020358	1377.32	0.460499	0.19009	2.42254	0.0154125	0.991763	Ptov1
ENSRNOG00000063955	6.34834	4.40938	1.54543	2.85317	0.00432859	0.991763	LOC120100271
ENSRNOG00000066355	12.1748	-1.86569	0.826201	-2.25816	0.0239359	0.991763
ENSRNOG00000058869	0.220873	1.36397	4.07904	0.334385	0.738089	0.991763
ENSRNOG00000064667	1.37039	1.12141	2.10034	0.53392	0.593397	0.991763	Tmem86b
ENSRNOG00000053502	1398.4	0.040973	0.133784	0.306262	0.759405	0.991763	Arhgef17
ENSRNOG00000065888	0.354322	2.15853	4.04916	0.53308	0.593978	0.991763	Rnu6-525
ENSRNOG00000021442	25.4733	0.106635	0.563927	0.189093	0.85002	0.991763	Hddc2
ENSRNOG00000066023	18.317	0.179062	0.621775	0.287985	0.773358	0.991763
ENSRNOG00000014278	173.154	0.273713	0.22585	1.21193	0.22554	0.991763	Zfp710
ENSRNOG00000049605	1.43843	1.31854	2.2168	0.594796	0.55198	0.991763	Zfp296
ENSRNOG00000063802	0.133322	-0.569836	4.08047	-0.139649	0.888937	0.991763	LOC120100330
ENSRNOG00000022921	181.776	-0.0610683	0.289588	-0.21088	0.832981	0.991763	Dact2
ENSRNOG00000037360	7.89162	-0.964399	0.96106	-1.00347	0.315632	0.991763
ENSRNOG00000015902	9.77102	-0.100259	0.873092	-0.114832	0.908578	0.991763	Cpxm2
ENSRNOG00000065994	5.68026	0.762161	1.2741	0.598194	0.54971	0.991763	LOC120100257
ENSRNOG00000013981	724.814	-0.0853673	0.163183	-0.523139	0.600878	0.991763	Ptpn5
ENSRNOG00000065346	20.5104	0.293702	0.682952	0.430048	0.667161	0.991763
ENSRNOG00000019942	3.15981	-2.15695	1.5415	-1.39926	0.161735	0.991763	Fbxo17
ENSRNOG00000021912	0.631982	3.0071	3.50032	0.859095	0.390288	0.991763	Gpr152
ENSRNOG00000059083	0.430107	-2.03897	3.99555	-0.51031	0.609834	0.991763	LOC120100370
ENSRNOG00000030818	132.36	0.211872	0.252617	0.838708	0.401633	0.991763	C1h11orf42
ENSRNOG00000065632	8.68077	-0.600017	0.889393	-0.674636	0.499907	0.991763	LOC120100263
ENSRNOG00000064515	81.4252	-0.525952	0.299399	-1.75669	0.0789702	0.991763
ENSRNOG00000017930	175.473	-0.0862599	0.223901	-0.385259	0.700045	0.991763	Lpcat1
ENSRNOG00000043280	0.163464	-0.569836	4.08047	-0.139649	0.888937	0.991763	Vom2r37
ENSRNOG00000066535	0.133322	-0.569836	4.08047	-0.139649	0.888937	0.991763	LOC120100459
ENSRNOG00000063371	59.2414	-0.206902	0.379832	-0.54472	0.585946	0.991763
ENSRNOG00000060965	1.41991	0.960746	2.38712	0.402471	0.687337	0.991763	LOC120100422
ENSRNOG00000068809	58.4363	0.553975	0.365571	1.51537	0.129679	0.991763
ENSRNOG00000019869	292.152	0.0309902	0.229829	0.13484	0.892738	0.991763	Lrfn1
ENSRNOG00000062374	2.26889	0.78469	1.70712	0.459657	0.645762	0.991763
ENSRNOG00000067318	111.084	-0.0535841	0.262206	-0.204358	0.838073	0.991763
ENSRNOG00000013208	0.163464	-0.569836	4.08047	-0.139649	0.888937	0.991763	Or9i14
ENSRNOG00000059321	0.163464	-0.569836	4.08047	-0.139649	0.888937	0.991763	LOC120100395
ENSRNOG00000052179	0.133448	1.34798	4.07966	0.330416	0.741086	0.991763	LOC120100397
ENSRNOG00000023411	32.6304	1.24344	0.567787	2.18998	0.0285255	0.991763	Vsig10l
ENSRNOG00000046005	16485.7	0.0656583	0.148555	0.44198	0.658504	0.991763	Scd2
ENSRNOG00000018686	701.306	0.12302	0.152934	0.804399	0.421167	0.991763	Atxn2l
ENSRNOG00000063261	28.9044	-0.585996	0.535793	-1.0937	0.274088	0.991763
ENSRNOG00000066529	0.133448	1.34798	4.07966	0.330416	0.741086	0.991763	LOC120100485
ENSRNOG00000058906	17.2514	-0.720284	0.73361	-0.981835	0.326181	0.991763	Ptprh
ENSRNOG00000069563	4.02351	0.522009	1.39997	0.372871	0.709244	0.991763
ENSRNOG00000062703	1.51157	-0.452498	2.14007	-0.211441	0.832543	0.991763
ENSRNOG00000070309	5.4564	0.559089	1.13624	0.492054	0.622681	0.991763
ENSRNOG00000053089	18.6788	-1.05618	0.777023	-1.35927	0.174062	0.991763	LOC120100352
ENSRNOG00000057890	1.35388	0.250258	2.25091	0.111181	0.911473	0.991763	Rnu4-5
ENSRNOG00000017408	440.225	0.145187	0.203318	0.71409	0.475171	0.991763	Fhip1b
ENSRNOG00000021794	118.969	-0.0871624	0.3083	-0.282719	0.777392	0.991763	Znhit2
ENSRNOG00000069938	2.56816	0.391732	1.63627	0.239406	0.810791	0.991763
ENSRNOG00000013949	347.326	0.435484	0.174968	2.48894	0.0128126	0.991763	Idh2
ENSRNOG00000064463	0.460376	-0.665162	4.02408	-0.165295	0.868711	0.991763	LOC120100124
ENSRNOG00000052712	0.133448	1.34798	4.07966	0.330416	0.741086	0.991763	LOC120100455
ENSRNOG00000065858	2.34877	0.555264	1.71672	0.323445	0.746358	0.991763
ENSRNOG00000016103	30.9588	-0.0826614	0.498992	-0.165657	0.868427	0.991763	Nkd2
ENSRNOG00000034012	4.83474	0.130308	1.3218	0.0985837	0.921469	0.991763	Klk12
ENSRNOG00000068668	0.133322	-0.569836	4.08047	-0.139649	0.888937	0.991763	LOC120100405
ENSRNOG00000055001	37.3663	-1.53014	0.661832	-2.31197	0.0207791	0.991763	Snora3
ENSRNOG00000020643	171.538	0.240851	0.251191	0.958837	0.337641	0.991763	Bub3
ENSRNOG00000018217	18.8266	0.407509	0.64823	0.628649	0.529579	0.991763	Syt5
ENSRNOG00000064778	0.45251	2.47629	4.02155	0.615754	0.538057	0.991763
ENSRNOG00000065642	0.364958	0.402201	4.07904	0.0986019	0.921454	0.991763
ENSRNOG00000057923	79.0498	-0.570949	0.438766	-1.30126	0.193169	0.991763	Snora23
ENSRNOG00000058790	883.992	0.0678775	0.155891	0.435417	0.66326	0.991763	Fam120b
ENSRNOG00000020371	22.4515	0.40292	0.56352	0.715007	0.474605	0.991763	Pgap2
ENSRNOG00000014996	39.711	0.317734	0.445371	0.713414	0.47559	0.991763	Katna1
ENSRNOG00000067296	68.8837	-0.54849	0.343015	-1.59902	0.109815	0.991763	LOC108348090
ENSRNOG00000064765	39.8021	-1.67355	0.625274	-2.6765	0.00743947	0.991763	Snora30
ENSRNOG00000018742	9.8522	-1.12216	0.833546	-1.34625	0.178223	0.991763	Klk11
ENSRNOG00000017914	51.3545	0.0430849	0.367449	0.117254	0.906659	0.991763	Cavin3
ENSRNOG00000014705	18.8942	-0.44061	0.616895	-0.714238	0.47508	0.991763	Rbm20
ENSRNOG00000070027	28.3415	-0.49805	0.499785	-0.99653	0.318993	0.991763
ENSRNOG00000016812	2.439	2.12639	1.69902	1.25153	0.210739	0.991763	Adamts16
ENSRNOG00000009932	10.235	-0.292091	0.996871	-0.293008	0.769516	0.991763	Mctp2
ENSRNOG00000020865	32.7727	0.812622	0.509705	1.5943	0.110869	0.991763	Ano1
ENSRNOG00000020714	38.8023	0.607046	0.507098	1.1971	0.231268	0.991763	Trpm4
ENSRNOG00000015825	128.601	-0.430921	0.305157	-1.41213	0.157912	0.991763	Aurkc
ENSRNOG00000067561	1.33417	-1.0017	2.27001	-0.441274	0.659014	0.991763
ENSRNOG00000064500	1.64854	1.58596	2.14066	0.740874	0.45877	0.991763
ENSRNOG00000014840	91.5235	-0.673593	0.376441	-1.78937	0.0735552	0.991763	Gna14
ENSRNOG00000064970	32.7372	0.100848	0.461045	0.218738	0.826854	0.991763	Zfp939
ENSRNOG00000025060	11.8069	-0.562242	0.782458	-0.718559	0.472413	0.991763	Nanos1
ENSRNOG00000063721	0.364958	0.402201	4.07904	0.0986019	0.921454	0.991763
ENSRNOG00000030127	846.492	0.237973	0.156282	1.52271	0.127831	0.991763	Eml2
ENSRNOG00000027098	3144.64	0.182841	0.161297	1.13357	0.256976	0.991763	Sez6l2
ENSRNOG00000067414	0.326927	-1.62121	4.02491	-0.402793	0.6871	0.991763
ENSRNOG00000017311	350.871	-0.0209806	0.22203	-0.0944947	0.924716	0.991763	Me3
ENSRNOG00000019270	25.726	1.25187	0.567608	2.20551	0.0274181	0.991763	P2ry6
ENSRNOG00000066986	83.6184	-0.328897	0.320142	-1.02735	0.304256	0.991763	Zfp619
ENSRNOG00000018762	31.874	0.195914	0.47955	0.408536	0.68288	0.991763	Rsph3
ENSRNOG00000069528	8.5545	-0.576782	0.87875	-0.656367	0.511588	0.991763
ENSRNOG00000067989	2.73301	0.947285	1.62901	0.581509	0.560898	0.991763
ENSRNOG00000015956	290.742	0.0644068	0.221547	0.290714	0.77127	0.991763	Usp29
ENSRNOG00000018019	1569.72	-0.14499	0.138884	-1.04396	0.296503	0.991763	Hspa12a
ENSRNOG00000046036	7.98494	0.228656	0.881239	0.259471	0.795272	0.991763	Itprip
ENSRNOG00000065449	2.33305	-2.14459	1.86021	-1.15287	0.248962	0.991763
ENSRNOG00000069855	0.642285	-1.01288	3.25464	-0.311213	0.755639	0.991763
ENSRNOG00000065828	0.463273	2.50636	4.01923	0.62359	0.532897	0.991763	LOC120100164
ENSRNOG00000016372	62.8591	-0.19214	0.417467	-0.460252	0.645335	0.991763	Slc12a7
ENSRNOG00000057858	1.8881	2.53978	2.44474	1.03888	0.298862	0.991763
ENSRNOG00000064099	0.326927	-1.62121	4.02491	-0.402793	0.6871	0.991763
ENSRNOG00000060031	5.57334	0.898989	1.07184	0.838736	0.401617	0.991763	Snord35a
ENSRNOG00000055560	8.80223	0.329659	0.955235	0.345107	0.730014	0.991763	LOC120100339
ENSRNOG00000065835	2.16062	-0.673977	2.01051	-0.335228	0.737453	0.991763
ENSRNOG00000063775	2.07404	2.48588	1.95691	1.27031	0.203974	0.991763	LOC102546375
ENSRNOG00000070824	0.133322	-0.569836	4.08047	-0.139649	0.888937	0.991763	Rnu6-891
ENSRNOG00000064277	0.365085	2.19387	4.04579	0.542259	0.58764	0.991763
ENSRNOG00000068327	62.3464	-0.274927	0.397994	-0.690782	0.489702	0.991763	Pdcd5
ENSRNOG00000019812	287.625	0.159409	0.241325	0.660558	0.508896	0.991763	Nr1h2
ENSRNOG00000070842	12.2337	0.110463	0.883908	0.124971	0.900547	0.991763
ENSRNOG00000060311	0.133322	-0.569836	4.08047	-0.139649	0.888937	0.991763	LOC120100340
ENSRNOG00000025940	44.397	-0.406896	0.407969	-0.997369	0.318586	0.991763	Mettl9
ENSRNOG00000057115	1.0053	0.408793	2.53763	0.161092	0.872021	0.991763	Rnu2-57
ENSRNOG00000053764	1.85728	0.237874	1.9593	0.121408	0.903368	0.991763	Snord33
ENSRNOG00000020393	276.925	0.277673	0.26065	1.06531	0.286735	0.991763	Rhog
ENSRNOG00000067076	111.653	0.283506	0.282705	1.00283	0.315942	0.991763	Frat1
ENSRNOG00000060156	2.34424	-0.396719	1.79891	-0.220533	0.825456	0.991763	Snord28b
ENSRNOG00000052300	0.770185	-1.43113	3.04113	-0.470592	0.637932	0.991763	Snord35b
ENSRNOG00000054315	0.830549	-1.53802	2.75398	-0.558471	0.576523	0.991763	Snord27
ENSRNOG00000053158	0.666988	0.638981	3.47549	0.183853	0.854128	0.991763	LOC120100341
ENSRNOG00000010840	13.8712	0.722397	0.752065	0.960552	0.336778	0.991763	Adamtsl3
ENSRNOG00000070884	0.533794	2.7861	3.99973	0.696573	0.48607	0.991763	LOC120100358
ENSRNOG00000068967	0.163464	-0.569836	4.08047	-0.139649	0.888937	0.991763	RGD1560718
ENSRNOG00000068967	0.163464	-0.569836	4.08047	-0.139649	0.888937	0.991763	LOC120100105
ENSRNOG00000010308	63.2424	-0.129807	0.365571	-0.355081	0.722529	0.991763	Nr2f2
ENSRNOG00000017277	11.6175	-0.448616	0.779314	-0.575655	0.564848	0.991763	Igsf6
ENSRNOG00000046395	0.26677	0.38621	4.07966	0.0946672	0.924579	0.991763	LOC120100003
ENSRNOG00000013426	1.95783	-0.584504	1.81519	-0.322008	0.747447	0.991763	Mrgprf
ENSRNOG00000017851	6.48682	0.577692	1.04248	0.55415	0.579476	0.991763	Etfb
ENSRNOG00000042465	2.30033	-0.198599	1.68285	-0.118013	0.906057	0.991763	Zbtb32
ENSRNOG00000068788	0.296912	0.38621	4.07966	0.0946672	0.924579	0.991763
ENSRNOG00000056942	1.22118	1.46747	2.58345	0.568027	0.570017	0.991763	LOC120100232
ENSRNOG00000065112	1.18139	-0.704739	2.59989	-0.271065	0.786341	0.991763
ENSRNOG00000059323	0.326927	-1.62121	4.02491	-0.402793	0.6871	0.991763	LOC120100373
ENSRNOG00000068353	8.21282	-0.649047	1.00142	-0.648129	0.516902	0.991763
ENSRNOG00000062431	0.830706	2.15878	3.20615	0.673323	0.500742	0.991763
ENSRNOG00000015058	0.133448	1.34798	4.07966	0.330416	0.741086	0.991763	Gucy2e
ENSRNOG00000061556	0.231637	1.36397	4.07904	0.334385	0.738089	0.991763	LOC120100477
ENSRNOG00000011439	91.7069	0.262979	0.320438	0.820688	0.411824	0.991763	Grk5
ENSRNOG00000017635	217.638	-0.443764	0.214061	-2.07307	0.0381656	0.991763	Inpp5a
ENSRNOG00000056397	125.604	-0.856899	0.402163	-2.13073	0.0331115	0.991763	LOC120100233
ENSRNOG00000068081	35.952	-0.275131	0.594299	-0.462951	0.643399	0.991763
ENSRNOG00000065098	1.57064	-0.806852	2.18162	-0.369841	0.711501	0.991763	Hmgb1-ps4
ENSRNOG00000029394	537.446	-0.0695264	0.18405	-0.377759	0.70561	0.991763	Dusp8
ENSRNOG00000017884	43.3532	-0.0853671	0.430494	-0.1983	0.84281	0.991763	Dnajb6-ps10
ENSRNOG00000064417	79.3307	-0.151643	0.337575	-0.449214	0.653277	0.991763
ENSRNOG00000021082	260.776	0.166818	0.189403	0.880754	0.378451	0.991763	Kdelr1
ENSRNOG00000066269	13.9875	-0.262402	0.678155	-0.386936	0.698804	0.991763
ENSRNOG00000020197	35.8043	-0.0611584	0.512937	-0.119232	0.905092	0.991763	Cd248
ENSRNOG00000016687	25.7701	0.249733	0.519374	0.480834	0.630634	0.991763	Ssc5d
ENSRNOG00000059984	129.244	0.12648	0.270303	0.467918	0.639844	0.991763	Dll1
ENSRNOG00000053279	0.133322	-0.569836	4.08047	-0.139649	0.888937	0.991763	LOC120100359
ENSRNOG00000055124	9.2109	-0.322924	0.905219	-0.356735	0.72129	0.991763
ENSRNOG00000020363	319.298	0.166306	0.197684	0.84127	0.400197	0.991763	Med25
ENSRNOG00000020871	329.463	0.487365	0.221931	2.19602	0.0280905	0.991763	Ltbp4
ENSRNOG00000033843	0.133322	-0.569836	4.08047	-0.139649	0.888937	0.991763
ENSRNOG00000021151	36.1266	0.250335	0.45696	0.547828	0.58381	0.991763	Ppp1r14b
ENSRNOG00000017054	6.46582	-0.124536	1.16517	-0.106882	0.914882	0.991763
ENSRNOG00000018310	22.011	1.06033	0.556397	1.9057	0.0566891	0.991763	Eno4
ENSRNOG00000030404	649.65	-0.0897715	0.170851	-0.525438	0.599279	0.991763	Arrb1
ENSRNOG00000054533	109.635	-0.35901	0.368713	-0.973684	0.330213	0.991763	LOC120100346
ENSRNOG00000021093	1.43541	-0.593432	2.20941	-0.268593	0.788243	0.991763	Syngr4
ENSRNOG00000067564	119.563	-0.0317674	0.334457	-0.094982	0.924329	0.991763
ENSRNOG00000014004	463.617	-0.422276	0.164368	-2.56909	0.0101967	0.991763	Ncoa7
ENSRNOG00000047816	120.123	0.193691	0.302018	0.641324	0.521312	0.991763	Ccs
ENSRNOG00000018433	72.7276	0.904411	0.369378	2.44847	0.0143465	0.991763	Hps6
ENSRNOG00000063050	5.21522	-2.30518	1.33562	-1.72592	0.0843616	0.991763
ENSRNOG00000064276	1.45104	-1.61952	2.30586	-0.702351	0.48246	0.991763
ENSRNOG00000058564	3.38365	1.24671	1.66092	0.750619	0.452882	0.991763
ENSRNOG00000063757	5.30414	1.6403	1.12258	1.4612	0.143962	0.991763
ENSRNOG00000020925	119.363	0.206849	0.270191	0.765565	0.443935	0.991763	Ccdc86
ENSRNOG00000068292	0.517785	1.19902	3.55565	0.337215	0.735955	0.991763
ENSRNOG00000066499	4.1778	1.00947	1.31769	0.766095	0.44362	0.991763	C1h10orf95
ENSRNOG00000064594	1.62368	2.17035	2.17556	0.997607	0.31847	0.991763
ENSRNOG00000070917	1.47669	1.0792	2.19914	0.49074	0.62361	0.991763	LOC102556098
ENSRNOG00000055259	3.25831	0.592439	1.471	0.402746	0.687135	0.991763	Phldb3
ENSRNOG00000071167	0.133448	1.34798	4.07966	0.330416	0.741086	0.991763
ENSRNOG00000064168	0.133448	1.34798	4.07966	0.330416	0.741086	0.991763
ENSRNOG00000051968	0.326927	-1.62121	4.02491	-0.402793	0.6871	0.991763
ENSRNOG00000012140	61.3184	-0.0887595	0.339479	-0.261458	0.793739	0.991763	Cep89
ENSRNOG00000014828	164.766	-0.0961954	0.305057	-0.315336	0.752506	0.991763	Avpi1
ENSRNOG00000020497	327.119	-0.225013	0.209298	-1.07508	0.282337	0.991763	Plekha1
ENSRNOG00000070030	5.32445	0.223797	1.2633	0.177152	0.859389	0.991763
ENSRNOG00000025154	35.0957	-0.276133	0.489714	-0.563867	0.572845	0.991763	LOC100359574
ENSRNOG00000014448	163.253	-0.361796	0.242806	-1.49006	0.136208	0.991763	Bmal1
ENSRNOG00000057415	0.441747	2.44577	4.02396	0.607801	0.543319	0.991763	LOC120100454
ENSRNOG00000015753	1314.46	0.0803124	0.185193	0.433669	0.664528	0.991763	Epn1
ENSRNOG00000067461	0.138663	-0.569836	4.08047	-0.139649	0.888937	0.991763	Rps12l2
ENSRNOG00000052577	70.2651	-1.03568	0.493771	-2.09748	0.0359511	0.991763	Snora54
ENSRNOG00000028781	10.3543	-0.689634	0.784843	-0.87869	0.379569	0.991763	Abcc6
ENSRNOG00000053931	0.133448	1.34798	4.07966	0.330416	0.741086	0.991763	Rnu11-3
ENSRNOG00000070838	0.410649	-1.97953	3.99924	-0.494977	0.620616	0.991763
ENSRNOG00000056494	1.01694	3.66073	2.94574	1.24272	0.213971	0.991763	LOC120100441
ENSRNOG00000064885	29.381	-0.20212	0.57774	-0.349846	0.726455	0.991763
ENSRNOG00000054561	5.69868	-0.163055	1.05993	-0.153836	0.877739	0.991763	Isg20
ENSRNOG00000052568	15.1158	-0.10736	0.650261	-0.165102	0.868863	0.991763	LOC120100289
ENSRNOG00000070839	0.133448	1.34798	4.07966	0.330416	0.741086	0.991763
ENSRNOG00000065383	0.384337	0.402201	4.07904	0.0986019	0.921454	0.991763
ENSRNOG00000011306	2.88731	-3.70053	3.91972	-0.944079	0.345129	0.991763	Myod1
ENSRNOG00000069489	3.91982	0.449649	1.2404	0.362504	0.716975	0.991763
ENSRNOG00000019491	142.317	0.0765445	0.264588	0.289297	0.772354	0.991763	Stard10
ENSRNOG00000019626	5.23499	-0.249952	1.08608	-0.230142	0.817981	0.991763	Slc27a5
ENSRNOG00000064994	35.2615	-0.55024	0.557389	-0.987174	0.323557	0.991763
ENSRNOG00000031381	2.30481	-2.11848	1.91609	-1.10563	0.268887	0.991763	RGD1561333
ENSRNOG00000021153	80.6731	-0.249591	0.366507	-0.680998	0.495873	0.991763	Fkbp2
ENSRNOG00000021153	80.6731	-0.249591	0.366507	-0.680998	0.495873	0.991763	LOC120093053
ENSRNOG00000055625	0.441747	2.44577	4.02396	0.607801	0.543319	0.991763	LOC120100113
ENSRNOG00000037137	62.8379	0.242533	0.350073	0.692807	0.488431	0.991763	Svip
ENSRNOG00000014380	59.7799	-0.049537	0.361318	-0.137101	0.890951	0.991763	Zfp788
ENSRNOG00000035472	0.558564	-0.64618	3.75348	-0.172155	0.863316	0.991763	Mir204
ENSRNOG00000017150	61.7177	0.1819	0.377755	0.481529	0.63014	0.991763	Med10
ENSRNOG00000015168	1.20063	-0.462648	2.20865	-0.209471	0.83408	0.991763	LOC365238
ENSRNOG00000063014	12.7463	1.00739	0.713805	1.4113	0.158157	0.991763
ENSRNOG00000022308	0.231637	1.36397	4.07904	0.334385	0.738089	0.991763	LOC120099997
ENSRNOG00000020517	7.16127	0.274322	0.969172	0.283048	0.77714	0.991763	Prrg2
ENSRNOG00000062805	12.9542	-0.365866	0.775874	-0.471553	0.637246	0.991763	Or14c39
ENSRNOG00000040448	0.97554	3.62979	2.94296	1.23338	0.217434	0.991763	Mir146b
ENSRNOG00000060169	0.220873	1.36397	4.07904	0.334385	0.738089	0.991763	LOC120100140
ENSRNOG00000015914	928.128	0.141094	0.191341	0.737395	0.460882	0.991763	U2af2
ENSRNOG00000019141	20.482	0.088813	0.574715	0.154534	0.877189	0.991763	Ch25h
ENSRNOG00000035477	0.266897	1.91492	4.06073	0.47157	0.637234	0.991763	Mir8
ENSRNOG00000019582	167.736	0.209844	0.223868	0.937356	0.348576	0.991763	Mthfd1l
ENSRNOG00000019440	3.44098	-4.02321	1.92344	-2.09168	0.0364674	0.991763	Kcnn4
ENSRNOG00000065361	6.46226	0.155148	1.01981	0.152134	0.879081	0.991763	Snora52
ENSRNOG00000060727	0.163464	-0.569836	4.08047	-0.139649	0.888937	0.991763	Mir292
ENSRNOG00000013149	107.17	-0.286564	0.265778	-1.07821	0.280941	0.991763	Vps33b
ENSRNOG00000036588	0.585832	1.50232	3.40033	0.441816	0.658622	0.991763
ENSRNOG00000019660	0.354195	0.402201	4.07904	0.0986019	0.921454	0.991763	Spib
ENSRNOG00000069238	0.326927	-1.62121	4.02491	-0.402793	0.6871	0.991763	LOC120100134
ENSRNOG00000067431	1.6449	-0.654668	2.07632	-0.315303	0.752532	0.991763
ENSRNOG00000018048	213.467	-0.37074	0.220207	-1.6836	0.0922587	0.991763	Dctn5
ENSRNOG00000062528	0.133448	1.34798	4.07966	0.330416	0.741086	0.991763
ENSRNOG00000066334	0.757161	-1.60465	3.06351	-0.523794	0.600422	0.991763
ENSRNOG00000010224	118.893	-0.281528	0.295271	-0.953454	0.34036	0.991763	Rab30
ENSRNOG00000035506	0.163464	-0.569836	4.08047	-0.139649	0.888937	0.991763	Mir326
ENSRNOG00000051496	0.133448	1.34798	4.07966	0.330416	0.741086	0.991763	RGD1563099
ENSRNOG00000066659	3.35091	-0.433795	1.43163	-0.303007	0.761884	0.991763
ENSRNOG00000029043	143.667	-0.427318	0.273028	-1.5651	0.117558	0.991763	Zfp84
ENSRNOG00000017095	120.293	0.0535334	0.254663	0.210212	0.833502	0.991763
ENSRNOG00000067938	0.762376	-2.856	2.9991	-0.952286	0.340952	0.991763
ENSRNOG00000068714	0.133448	1.34798	4.07966	0.330416	0.741086	0.991763
ENSRNOG00000018421	22.0374	-1.06468	0.570472	-1.86631	0.061998	0.991763	Aen
ENSRNOG00000019681	38.2245	0.35534	0.473442	0.750546	0.452926	0.991763	Pold1
ENSRNOG00000064548	0.993789	-1.23829	2.74201	-0.451597	0.651559	0.991763
ENSRNOG00000070419	2.03835	1.86602	1.77478	1.05141	0.293071	0.991763
ENSRNOG00000020202	470.685	-0.0438048	0.169226	-0.258853	0.795748	0.991763	Asrgl1
ENSRNOG00000017613	275.583	-0.224255	0.227655	-0.985067	0.324591	0.991763	Tent4a
ENSRNOG00000055519	56.9905	-0.180124	0.370955	-0.485569	0.627273	0.991763	Zfp84
ENSRNOG00000011234	1.72874	-0.304382	1.89354	-0.160747	0.872292	0.991763
ENSRNOG00000015997	165.647	0.205614	0.236237	0.870369	0.384099	0.991763	Ccdc106
ENSRNOG00000064983	0.133448	1.34798	4.07966	0.330416	0.741086	0.991763
ENSRNOG00000015773	8.55223	0.776448	0.931159	0.833851	0.404365	0.991763	Il21r
ENSRNOG00000055020	0.133448	1.34798	4.07966	0.330416	0.741086	0.991763
ENSRNOG00000062071	4.24908	2.05824	1.53293	1.34269	0.179374	0.991763	LOC102548890
ENSRNOG00000069729	2.12772	1.4669	1.92963	0.760199	0.447136	0.991763
ENSRNOG00000066969	50.2315	-0.517955	0.393679	-1.31568	0.188282	0.991763	Zfp790
ENSRNOG00000032990	1.89266	-0.949999	2.20798	-0.430258	0.667008	0.991763	Siglecl1
ENSRNOG00000063602	10.8906	-0.61692	0.780732	-0.790181	0.429422	0.991763
ENSRNOG00000014251	331.283	0.310847	0.196739	1.57999	0.114109	0.991763	Capn5
ENSRNOG00000066794	117.001	0.145257	0.262771	0.552788	0.580409	0.991763
ENSRNOG00000017214	0.133322	-0.569836	4.08047	-0.139649	0.888937	0.991763	Or52h7
ENSRNOG00000067780	2.61619	1.71283	1.77979	0.962382	0.335858	0.991763	LOC103691054
ENSRNOG00000025539	550.542	-0.315189	0.228587	-1.37886	0.167938	0.991763	Vps13a
ENSRNOG00000066862	49.3964	0.420525	0.406396	1.03477	0.300778	0.991763
ENSRNOG00000012716	356.744	-0.120703	0.185629	-0.650241	0.515537	0.991763	Chd2
ENSRNOG00000063182	69.951	0.714916	0.413298	1.72979	0.0836686	0.991763
ENSRNOG00000047479	0.133448	1.34798	4.07966	0.330416	0.741086	0.991763	Or52ac1
ENSRNOG00000069497	0.41599	-1.99646	3.99818	-0.499342	0.617538	0.991763	Rpl23a-ps5
ENSRNOG00000016011	335.226	-0.271247	0.194572	-1.39407	0.163297	0.991763	Plekhg1
ENSRNOG00000055082	461.726	0.230902	0.171175	1.34893	0.177361	0.991763	Maz
ENSRNOG00000068838	0.271985	-1.3897	4.0451	-0.34355	0.731184	0.991763
ENSRNOG00000019129	21.0356	-0.40096	0.599213	-0.669145	0.503403	0.991763	Fcgbp
ENSRNOG00000017960	226.421	-0.107317	0.221562	-0.484366	0.628126	0.991763	Deaf1
ENSRNOG00000056062	29.2099	0.162873	0.541511	0.300775	0.763586	0.991763	LOC100912787
ENSRNOG00000046683	1.47947	1.99602	2.11149	0.945316	0.344498	0.991763	Lilrb3
ENSRNOG00000052256	532.046	-0.205601	0.170454	-1.2062	0.227742	0.991763	Dact3
ENSRNOG00000062365	1.15738	-0.789272	2.5665	-0.307529	0.758441	0.991763
ENSRNOG00000065700	1.77598	2.4916	2.2426	1.11103	0.266554	0.991763
ENSRNOG00000065336	2.75875	-2.73031	1.8875	-1.44652	0.14803	0.991763
ENSRNOG00000011931	965.857	0.174391	0.148858	1.17153	0.241387	0.991763	Smarca2
ENSRNOG00000037556	67.3162	0.153175	0.36476	0.419933	0.674535	0.991763	Zfp420
ENSRNOG00000069498	0.26677	0.38621	4.07966	0.0946672	0.924579	0.991763	Gvinp1
ENSRNOG00000068492	6.48123	1.65277	0.999898	1.65294	0.0983441	0.991763	Omp
ENSRNOG00000052236	14.5653	-0.416755	0.706284	-0.590067	0.555146	0.991763
ENSRNOG00000068138	39.9516	0.341376	0.413579	0.825419	0.409134	0.991763	Aldh3b2
ENSRNOG00000063331	0.163464	-0.569836	4.08047	-0.139649	0.888937	0.991763
ENSRNOG00000012301	1.77524	0.538973	2.02251	0.266487	0.789864	0.991763	Cfap161
ENSRNOG00000070848	99.4298	-0.144171	0.273183	-0.527745	0.597676	0.991763	Zfp27
ENSRNOG00000059992	0.817318	-2.95272	3.49904	-0.843865	0.398745	0.991763	Siglecl1
ENSRNOG00000042899	0.719407	3.17607	3.06352	1.03674	0.299858	0.991763	Fcgbpl1
ENSRNOG00000013160	1001.77	0.0687537	0.177784	0.386726	0.698959	0.991763	Sash1
ENSRNOG00000024077	3.05376	-1.51396	1.47295	-1.02784	0.304023	0.991763	Fbxo5
ENSRNOG00000069496	0.231637	1.36397	4.07904	0.334385	0.738089	0.991763
ENSRNOG00000020456	59.8159	-0.0517806	0.342015	-0.151399	0.879661	0.991763	Nucb2
ENSRNOG00000019802	46.284	-0.274259	0.431048	-0.636261	0.524606	0.991763	Zfp428
ENSRNOG00000065781	6.77809	-0.211802	1.16243	-0.182206	0.855421	0.991763
ENSRNOG00000062668	2.96405	2.07747	1.56189	1.3301	0.183486	0.991763
ENSRNOG00000012806	329.388	0.0835344	0.194839	0.428736	0.668116	0.991763	Rbbp6
ENSRNOG00000070914	12.1058	-0.399324	0.813513	-0.490864	0.623523	0.991763	Tmem238
ENSRNOG00000019497	379.885	-0.0946852	0.204929	-0.462038	0.644054	0.991763	Mrpl17
ENSRNOG00000045545	17.46	-0.783733	0.647622	-1.21017	0.226214	0.991763
ENSRNOG00000064214	1.08711	0.294965	2.66807	0.110554	0.91197	0.991763
ENSRNOG00000037331	27.2639	-0.172418	0.532166	-0.323992	0.745944	0.991763	Cd33
ENSRNOG00000063616	2.67704	-1.02422	1.62742	-0.629353	0.529118	0.991763
ENSRNOG00000062784	12.5872	1.61542	0.785167	2.05743	0.0396452	0.991763
ENSRNOG00000020774	57.3916	0.0646088	0.399342	0.161788	0.871473	0.991763	Zfp420
ENSRNOG00000064412	11.8621	0.438253	0.736029	0.595429	0.551557	0.991763
ENSRNOG00000037897	13.6933	-0.265413	0.747344	-0.355142	0.722483	0.991763	Rps19
ENSRNOG00000067637	0.528549	1.23213	3.529	0.349143	0.726982	0.991763
ENSRNOG00000062989	1.16115	3.85595	2.56471	1.50347	0.132719	0.991763
ENSRNOG00000015557	1.00518	-0.404248	2.74868	-0.14707	0.883077	0.991763	Umod
ENSRNOG00000024280	17.5433	0.834722	0.61969	1.347	0.17798	0.991763	Ccdc170
ENSRNOG00000055683	21.2826	0.549808	0.588513	0.934232	0.350184	0.991763	Cct7-ps1
ENSRNOG00000056228	55.2167	-0.260203	0.434384	-0.599016	0.549162	0.991763	Atp10a
ENSRNOG00000028743	704.25	0.331936	0.185833	1.78621	0.0740658	0.991763	Gal3st3
ENSRNOG00000067556	3.2412	0.9383	1.54925	0.605648	0.544749	0.991763
ENSRNOG00000028273	66.8169	0.0430285	0.440073	0.0977758	0.92211	0.991763	Tmem150b
ENSRNOG00000070853	0.133322	-0.569836	4.08047	-0.139649	0.888937	0.991763
ENSRNOG00000023233	70.0249	0.129546	0.327908	0.395067	0.692793	0.991763	Zfp658
ENSRNOG00000034075	1310.19	0.0717169	0.16057	0.446639	0.655136	0.991763	Ube2ql1
ENSRNOG00000014341	335.482	-0.174996	0.178882	-0.978272	0.32794	0.991763	Btbd10
ENSRNOG00000069950	1.66256	-0.954834	2.10963	-0.452608	0.650831	0.991763
ENSRNOG00000020543	203.126	0.490842	0.259209	1.89362	0.0582756	0.991763	Nosip
ENSRNOG00000020298	102.546	0.398963	0.291011	1.37096	0.170389	0.991763	Bag3
ENSRNOG00000018255	1556.93	-0.0913365	0.163843	-0.557464	0.57721	0.991763	Clptm1
ENSRNOG00000066399	76.5615	0.03279	0.302646	0.108345	0.913722	0.991763
ENSRNOG00000021000	30.3574	0.594221	0.590336	1.00658	0.314136	0.991763	Naaladl1
ENSRNOG00000062617	0.770185	-1.43113	3.04113	-0.470592	0.637932	0.991763
ENSRNOG00000062327	71.2992	-0.239504	0.324493	-0.738089	0.46046	0.991763
ENSRNOG00000016286	0.133448	1.34798	4.07966	0.330416	0.741086	0.991763	Iyd
ENSRNOG00000070318	14.0531	-0.1967	0.680731	-0.288953	0.772617	0.991763
ENSRNOG00000070963	0.364958	0.402201	4.07904	0.0986019	0.921454	0.991763
ENSRNOG00000033729	87.1965	-0.408808	0.340818	-1.19949	0.230336	0.991763	Zfp719
ENSRNOG00000063011	0.163464	-0.569836	4.08047	-0.139649	0.888937	0.991763
ENSRNOG00000018402	0.722027	-1.23572	3.40029	-0.363415	0.716295	0.991763	Apoc2
ENSRNOG00000011488	340.759	0.37731	0.200924	1.87787	0.0603985	0.991763	Sergef
ENSRNOG00000068145	1.89045	1.76186	2.00113	0.880431	0.378626	0.991763	LOC120100068
ENSRNOG00000067525	3.47542	-0.874322	1.3792	-0.633933	0.526125	0.991763	LOC120099976
ENSRNOG00000015441	91.506	0.48116	0.306521	1.56975	0.116474	0.991763	Il4r
ENSRNOG00000071003	1.32361	-0.309289	2.2734	-0.136047	0.891784	0.991763
ENSRNOG00000047057	109.136	0.111843	0.30629	0.365155	0.714996	0.991763	Gpr26
ENSRNOG00000020412	842.106	0.235445	0.172445	1.36533	0.172148	0.991763	Sf3b2
ENSRNOG00000065957	29.4194	-1.12515	0.52031	-2.16246	0.0305829	0.991763
ENSRNOG00000016923	471.388	-0.0870004	0.16129	-0.539404	0.589608	0.991763	Clptm1l
ENSRNOG00000066567	30.0727	-0.163014	0.500746	-0.325542	0.744771	0.991763
ENSRNOG00000018405	0.544097	-1.02593	3.45139	-0.297253	0.766274	0.991763	Apoc4
ENSRNOG00000010938	135.13	-0.302634	0.342935	-0.882484	0.377515	0.991763	Slc7a10
ENSRNOG00000065260	45.8717	-0.544117	0.41453	-1.31261	0.189314	0.991763
ENSRNOG00000063165	0.163464	-0.569836	4.08047	-0.139649	0.888937	0.991763	Or52l1b
ENSRNOG00000011029	92.4035	0.803738	0.369316	2.17629	0.0295336	0.991763	Sec11a
ENSRNOG00000015239	23.2053	0.155477	0.528569	0.294148	0.768645	0.991763	Ginm1
ENSRNOG00000069539	66.0977	0.0774734	0.34416	0.225109	0.821895	0.991763	Zfp74
ENSRNOG00000018426	19.011	-0.263585	0.62542	-0.421453	0.673424	0.991763	Apoc1
ENSRNOG00000020110	762.557	0.186573	0.16351	1.14105	0.253849	0.991763	B4gat1
ENSRNOG00000012084	497.01	-0.0465621	0.207688	-0.224193	0.822607	0.991763	Xpnpep1
ENSRNOG00000046652	29.9063	0.43794	0.488518	0.896467	0.370004	0.991763	LOC108348102
ENSRNOG00000013770	103.151	0.254728	0.349705	0.728409	0.466363	0.991763	Folh1
ENSRNOG00000024961	88.1969	-0.351218	0.303445	-1.15744	0.247094	0.991763	Usp35
ENSRNOG00000011672	0.133448	1.34798	4.07966	0.330416	0.741086	0.991763	Tph1
ENSRNOG00000017673	2666.58	-0.0685158	0.142735	-0.480022	0.631212	0.991763	Brsk1
ENSRNOG00000032150	1033.66	-0.304592	0.146964	-2.07256	0.0382132	0.991763	Adcy2
ENSRNOG00000018356	530.228	0.308924	0.178559	1.7301	0.0836122	0.991763	Trim3
ENSRNOG00000023753	686.657	-0.138121	0.156894	-0.880343	0.378673	0.991763	Afdn
ENSRNOG00000030932	122.679	0.0995067	0.289857	0.343296	0.731376	0.991763	Zfp14
ENSRNOG00000018761	860.776	0.073915	0.141299	0.523111	0.600897	0.991763	Eif3c
ENSRNOG00000062876	5.61097	-0.826352	1.07264	-0.770391	0.441068	0.991763	LOC108349685
ENSRNOG00000069274	0.533794	2.7861	3.99973	0.696573	0.48607	0.991763	LOC100910848
ENSRNOG00000070624	3.71029	0.336167	1.32286	0.254121	0.799402	0.991763
ENSRNOG00000030160	8.19654	0.406149	0.911041	0.445808	0.655736	0.991763	Zfp819
ENSRNOG00000069633	25.5643	0.109897	0.573808	0.191523	0.848116	0.991763	Itpripl2
ENSRNOG00000032946	32.5835	0.240621	0.530033	0.453974	0.649848	0.991763	Pdzd7
ENSRNOG00000025088	0.498407	1.23212	3.6047	0.341808	0.732495	0.991763	Tmc3
ENSRNOG00000020743	27.0076	-0.500163	0.603036	-0.829409	0.406873	0.991763	Cyp2s1
ENSRNOG00000012362	365.991	-0.159723	0.179315	-0.89074	0.373069	0.991763	Cacng3
ENSRNOG00000014303	885.34	-0.0633452	0.169631	-0.373429	0.708829	0.991763	Lrp11
ENSRNOG00000018454	8247.19	-0.0396787	0.143155	-0.277174	0.781647	0.991763	Apoe
ENSRNOG00000052023	4.70791	-0.866613	1.13436	-0.763964	0.444889	0.991763	Zfp82
ENSRNOG00000020531	89.6309	0.242571	0.303034	0.800475	0.423436	0.991763	Fen1
ENSRNOG00000019544	94.8494	-0.265444	0.283282	-0.937029	0.348744	0.991763	Zbtb2
ENSRNOG00000020477	7.53863	-0.344217	0.930275	-0.370016	0.71137	0.991763	LOC100911093
ENSRNOG00000023549	114.178	-0.54569	0.272275	-2.00419	0.0450499	0.991763	Samd5
ENSRNOG00000070385	1.24145	-0.533613	2.32264	-0.229744	0.81829	0.991763
ENSRNOG00000021096	115.509	0.07186	0.27006	0.266089	0.79017	0.991763	Tmem143
ENSRNOG00000021149	0.533287	-2.3576	3.97813	-0.592641	0.553421	0.991763	Ush1c
ENSRNOG00000022796	26.6237	0.468651	0.584856	0.801309	0.422953	0.991763	Fgfbp3
ENSRNOG00000029784	712.948	-0.256877	0.183306	-1.40136	0.161108	0.991763	Pak1
ENSRNOG00000018885	184.777	-0.334722	0.277464	-1.20636	0.227677	0.991763	Znf780b
ENSRNOG00000018885	184.777	-0.334722	0.277464	-1.20636	0.227677	0.991763	Zfp780b
ENSRNOG00000063852	113.448	0.123477	0.274302	0.45015	0.652602	0.991763
ENSRNOG00000048138	23.2028	-0.0866622	0.589352	-0.147047	0.883095	0.991763	Zfp566
ENSRNOG00000017982	1.33398	0.63186	2.64949	0.238483	0.811506	0.991763	Pnliprp2
ENSRNOG00000019306	235.112	-0.106132	0.222107	-0.477843	0.632762	0.991763	Syt12
ENSRNOG00000018440	468.222	0.105483	0.184655	0.571243	0.567835	0.991763	Arfip2
ENSRNOG00000029082	1.26872	0.377918	2.16086	0.174892	0.861164	0.991763	RGD1566189
ENSRNOG00000021104	7.78415	0.810103	1.10856	0.730771	0.464919	0.991763	Emp3
ENSRNOG00000011451	538.498	0.250115	0.184228	1.35764	0.174578	0.991763	Lrp3
ENSRNOG00000017254	197.8	0.0919283	0.231483	0.397128	0.691273	0.991763	Nsun2
ENSRNOG00000020117	153.926	0.048581	0.248027	0.19587	0.844712	0.991763	Brms1
ENSRNOG00000050995	47.9037	-0.0785337	0.428395	-0.183321	0.854546	0.991763	Zfp780b
ENSRNOG00000054854	2.75915	-0.157224	1.5649	-0.100469	0.919972	0.991763	LOC691716
ENSRNOG00000015503	445.339	0.285685	0.203656	1.40278	0.160682	0.991763	Otud7a
ENSRNOG00000020274	32.747	-0.182347	0.443902	-0.410782	0.681232	0.991763	Taf5
ENSRNOG00000069173	0.825207	-1.52716	2.95546	-0.516726	0.605347	0.991763	RGD1563285
ENSRNOG00000065528	8.8808	0.217504	0.856947	0.253813	0.79964	0.991763	St8sia2
ENSRNOG00000022701	5.53179	2.11402	1.13319	1.86556	0.0621034	0.991763	Zfp819
ENSRNOG00000058039	20.9306	0.100148	0.55734	0.179689	0.857397	0.991763	Acta2
ENSRNOG00000018556	334.857	0.334718	0.199058	1.6815	0.0926651	0.991763	Tomm40
ENSRNOG00000065206	0.133448	1.34798	4.07966	0.330416	0.741086	0.991763
ENSRNOG00000042741	11.3264	1.44267	0.866012	1.66588	0.0957379	0.991763	Adgb
ENSRNOG00000028137	70.3646	-0.0786905	0.342294	-0.229891	0.818176	0.991763	Mki67
ENSRNOG00000051102	101.438	-0.0526634	0.307148	-0.17146	0.863862	0.991763
ENSRNOG00000019770	4.20024	2.48842	1.50416	1.65436	0.0980552	0.991763	Bnc1
ENSRNOG00000010983	7.51863	-0.443758	0.96099	-0.461772	0.644245	0.991763	Otog
ENSRNOG00000020296	52.298	0.559621	0.392656	1.42522	0.154093	0.991763	Atp5mk
ENSRNOG00000022640	2.78682	1.52663	1.84007	0.829661	0.40673	0.991763	Siglec8
ENSRNOG00000029805	36.3114	0.24428	0.515201	0.474145	0.635396	0.991763
ENSRNOG00000017601	141.377	-0.025758	0.271224	-0.0949696	0.924339	0.991763	Srd5a1
ENSRNOG00000027811	0.231637	1.36397	4.07904	0.334385	0.738089	0.991763	Lilrb4
ENSRNOG00000016090	199.204	0.212764	0.236758	0.898654	0.368837	0.991763	Mtmr10
ENSRNOG00000045560	3.48322	0.365149	1.7147	0.212952	0.831364	0.991763	Gvin1
ENSRNOG00000049596	0.974204	-2.05378	2.57101	-0.79882	0.424395	0.991763	Cfap58
ENSRNOG00000020651	275.694	0.0455975	0.196972	0.231493	0.816932	0.991763	Cars1
ENSRNOG00000065330	132.381	0.0571063	0.255868	0.223187	0.82339	0.991763	Mrgpre
ENSRNOG00000016679	101.931	0.307107	0.302354	1.01572	0.309763	0.991763	Tmc7
ENSRNOG00000018350	170.944	0.0624671	0.231747	0.269549	0.787508	0.991763	Shtn1
ENSRNOG00000028992	82.5641	-0.312975	0.309105	-1.01252	0.31129	0.991763	Acan
ENSRNOG00000019838	6.02343	-0.412372	1.25292	-0.329128	0.742059	0.991763	Gmfg
ENSRNOG00000068048	8.21447	1.06748	0.887099	1.20334	0.228844	0.991763
ENSRNOG00000019549	212.164	-0.091622	0.24145	-0.379466	0.704342	0.991763	Akap12
ENSRNOG00000011151	706.13	-0.0768355	0.171143	-0.448955	0.653464	0.991763	Tenm4
ENSRNOG00000022189	64.2175	-0.0852056	0.361171	-0.235915	0.813499	0.991763	Htatip2
ENSRNOG00000064154	5.82251	0.436278	1.22416	0.35639	0.721548	0.991763	Rassf10
ENSRNOG00000015526	0.364958	0.402201	4.07904	0.0986019	0.921454	0.991763	Rhcg
ENSRNOG00000023318	14.5958	-0.555857	0.715867	-0.776481	0.437465	0.991763	Tigd3
ENSRNOG00000066701	0.220873	1.36397	4.07904	0.334385	0.738089	0.991763	Atp5mj-ps1
ENSRNOG00000053075	369.746	0.255909	0.176349	1.45115	0.146737	0.991763	B4galnt4
ENSRNOG00000012874	429.618	0.308504	0.200504	1.53864	0.123891	0.991763	Rgma
ENSRNOG00000056069	4.30652	0.236213	1.30185	0.181444	0.856019	0.991763	Kif11
ENSRNOG00000048424	1.19261	-2.37248	2.41829	-0.981057	0.326565	0.991763
ENSRNOG00000024257	0.487643	1.1986	3.63384	0.329843	0.741518	0.991763	Irgc
ENSRNOG00000065214	9.31977	-0.56562	0.916121	-0.617407	0.536966	0.991763	LOC120097335
ENSRNOG00000017659	37.8389	-0.14944	0.470522	-0.317605	0.750784	0.991763	Hs3st2
ENSRNOG00000020777	180.189	-0.264086	0.228758	-1.15443	0.248322	0.991763	Zfp382
ENSRNOG00000016266	63.0756	0.417166	0.402749	1.0358	0.300297	0.991763	Mphosph10
ENSRNOG00000017839	226.317	0.366609	0.248408	1.47583	0.139988	0.991763	Ercc1
ENSRNOG00000017918	143.849	-0.2014	0.234473	-0.858949	0.390369	0.991763	Iglon5
ENSRNOG00000016381	41.8692	-0.0502457	0.498978	-0.100697	0.919791	0.991763	Ust
ENSRNOG00000020736	41.755	0.676904	0.415752	1.62814	0.103495	0.991763	Nadsyn1
ENSRNOG00000063010	0.133448	1.34798	4.07966	0.330416	0.741086	0.991763	Vom2r38
ENSRNOG00000023985	74.8055	-0.0753251	0.335885	-0.224259	0.822556	0.991763	Fan1
ENSRNOG00000016041	2.05925	-0.906748	1.91023	-0.47468	0.635015	0.991763	Zc3h12d
ENSRNOG00000019376	128.323	-0.355837	0.264972	-1.34292	0.179297	0.991763	Zfp329
ENSRNOG00000017456	85.9612	-0.369456	0.335646	-1.10073	0.271014	0.991763	Vstm2b
ENSRNOG00000008815	100.483	-0.174539	0.319369	-0.546511	0.584715	0.991763	Fbxo46
ENSRNOG00000016722	676.286	-0.115039	0.185212	-0.62112	0.534521	0.991763	Xpo6
ENSRNOG00000048397	327.898	0.183765	0.196337	0.935971	0.349288	0.991763	Sephs2
ENSRNOG00000017728	174.109	-0.246596	0.217975	-1.1313	0.257928	0.991763	Edrf1
ENSRNOG00000020783	1.05999	3.71314	2.90584	1.27782	0.201312	0.991763	Ntf4
ENSRNOG00000067450	195.212	-0.468392	0.266018	-1.76075	0.07828	0.991763	Zfp146
ENSRNOG00000015552	107.246	-0.382771	0.296088	-1.29276	0.196094	0.991763	Ppil4
ENSRNOG00000025819	0.266897	1.91492	4.06073	0.47157	0.637234	0.991763	Or52b2
ENSRNOG00000018955	0.163464	-0.569836	4.08047	-0.139649	0.888937	0.991763	Or6ae1
ENSRNOG00000064421	1.82722	1.83253	2.06529	0.887298	0.374918	0.991763
ENSRNOG00000019106	23.0229	0.807984	0.549894	1.46935	0.141739	0.991763	Rps17
ENSRNOG00000021474	13.7905	0.327344	0.757493	0.432142	0.665638	0.991763	Siglec5
ENSRNOG00000043512	1.49269	-0.376078	2.37643	-0.158253	0.874257	0.991763	LOC120099907
ENSRNOG00000028274	868.726	0.297181	0.173593	1.71194	0.0869076	0.991763	Myrf
ENSRNOG00000024410	161.418	0.222863	0.241428	0.9231	0.355955	0.991763	Blvrb
ENSRNOG00000010017	120.462	-0.286105	0.285696	-1.00143	0.316618	0.991763	Wee1
ENSRNOG00000050015	17.1667	-0.397024	0.634985	-0.62525	0.531807	0.991763
ENSRNOG00000047692	7.53385	-1.11797	1.00002	-1.11794	0.263591	0.991763	Hells
ENSRNOG00000060431	1.14425	-3.43879	3.097	-1.11036	0.266842	0.991763	Pfpl
ENSRNOG00000065271	6.4937	0.813919	0.995895	0.817274	0.413772	0.991763
ENSRNOG00000020304	284.522	0.126731	0.18508	0.684738	0.493509	0.991763	Pdcd11
ENSRNOG00000017418	1098.08	0.28492	0.155493	1.83237	0.0668964	0.991763	Rps3
ENSRNOG00000012369	65.7361	-0.0368887	0.321788	-0.114637	0.908733	0.991763	Fam174b
ENSRNOG00000055424	1.55495	0.296747	1.87584	0.158194	0.874304	0.991763	Polr2k-ps2
ENSRNOG00000024746	0.430107	-2.03897	3.99555	-0.51031	0.609834	0.991763	Or5a21
ENSRNOG00000014450	403.714	0.0365856	0.182486	0.200484	0.841102	0.991763	Shprh
ENSRNOG00000037298	58.3641	-0.495082	0.358459	-1.38114	0.167235	0.991763	C1h19orf81
ENSRNOG00000025247	0.902122	0.848366	2.86677	0.29593	0.767283	0.991763	Ccdc87
ENSRNOG00000023151	0.684146	3.07261	3.4201	0.898398	0.368973	0.991763	Scgb2a1
ENSRNOG00000048663	0.231637	1.36397	4.07904	0.334385	0.738089	0.991763
ENSRNOG00000016825	22.4561	-0.183208	0.532163	-0.344271	0.730643	0.991763	Polr1g
ENSRNOG00000024737	507.496	-0.0903844	0.154126	-0.586432	0.557586	0.991763	Tnrc6a
ENSRNOG00000013624	27.0914	0.600284	0.587829	1.02119	0.307166	0.991763	Uevld
ENSRNOG00000022610	2.97153	0.375442	1.53855	0.244024	0.807212	0.991763	Agbl1
ENSRNOG00000065850	0.498533	2.65741	3.85379	0.689557	0.490473	0.991763	Or13a26
ENSRNOG00000070456	4.36887	-0.9882	1.34408	-0.735222	0.462204	0.991763	LOC108348146
ENSRNOG00000020325	66.0782	-0.378246	0.3299	-1.14655	0.251568	0.991763	Calhm2
ENSRNOG00000019854	4.44219	0.406806	1.22032	0.333361	0.738862	0.991763	Napsa
ENSRNOG00000015413	69.5222	-0.125892	0.318975	-0.394678	0.69308	0.991763	Qpctl
ENSRNOG00000016897	127.133	-0.084733	0.327221	-0.258947	0.795676	0.991763	Rlbp1
ENSRNOG00000037690	14.4353	-0.855281	0.665395	-1.28537	0.198662	0.991763	Sertad3
ENSRNOG00000014330	859.071	-0.0717247	0.157817	-0.45448	0.649483	0.991763	Pcmt1
ENSRNOG00000026419	0.326927	-1.62121	4.02491	-0.402793	0.6871	0.991763	Fam24b
ENSRNOG00000013223	212.373	0.319758	0.223253	1.43227	0.152068	0.991763	Fah
ENSRNOG00000046112	129.956	0.108142	0.287968	0.375535	0.707263	0.991763	Dedd2
ENSRNOG00000027264	1754.52	0.066171	0.142201	0.465336	0.641691	0.991763	Dagla
ENSRNOG00000032798	368.368	0.0928439	0.201814	0.460046	0.645483	0.991763	Slco3a1
ENSRNOG00000019319	165.246	-0.19608	0.261683	-0.749305	0.453674	0.991763	Fchsd2
ENSRNOG00000018603	206.198	0.401426	0.254793	1.5755	0.115141	0.991763	Carns1
ENSRNOG00000032817	0.163464	-0.569836	4.08047	-0.139649	0.888937	0.991763	Vom1r50
ENSRNOG00000020763	849.57	0.195299	0.179757	1.08646	0.277276	0.991763	Snrnp70
ENSRNOG00000049505	36.8591	0.53616	0.439169	1.22085	0.222143	0.991763	Nup43
ENSRNOG00000059408	738.603	0.0821036	0.177144	0.463485	0.643017	0.991763	Prr12
ENSRNOG00000048250	26.9042	0.651692	0.616034	1.05788	0.290109	0.991763	Ldaf1
ENSRNOG00000028891	30.5195	0.547484	0.511996	1.06931	0.284928	0.991763	Cyp2t1
ENSRNOG00000019959	1468.37	-0.02429	0.150002	-0.161931	0.87136	0.991763	Kcnc3
ENSRNOG00000050224	139.614	-0.0653477	0.262244	-0.249186	0.803217	0.991763	Stambpl1
ENSRNOG00000013439	0.231637	1.36397	4.07904	0.334385	0.738089	0.991763	Cpn1
ENSRNOG00000014916	300.268	-0.181508	0.229234	-0.791803	0.428476	0.991763	Lats1
ENSRNOG00000033196	3.33621	5.39379	3.92223	1.37519	0.169074	0.991763
ENSRNOG00000020263	19401.8	0.0213296	0.152634	0.139744	0.888863	0.991763	Atp1a3
ENSRNOG00000058277	0.326927	-1.62121	4.02491	-0.402793	0.6871	0.991763
ENSRNOG00000051197	23.9021	-0.164365	0.532197	-0.308842	0.757441	0.991763	LOC120097345
ENSRNOG00000068712	0.800057	-1.72514	3.26326	-0.528655	0.597045	0.991763
ENSRNOG00000020947	389.707	0.220216	0.192996	1.14104	0.253854	0.991763	Egln2
ENSRNOG00000020597	58.3845	-0.372147	0.419123	-0.887919	0.374584	0.991763	C1h10orf88
ENSRNOG00000013506	157.213	0.0971752	0.265117	0.366537	0.713964	0.991763	Zfand6
ENSRNOG00000014277	75.0071	-0.187638	0.407927	-0.459978	0.645532	0.991763	Zdhhc13
ENSRNOG00000012641	134.342	-0.162449	0.261778	-0.62056	0.534889	0.991763	Sfr1
ENSRNOG00000015675	448.083	-0.351909	0.198159	-1.77589	0.0757513	0.991763	Nell1
ENSRNOG00000050206	1553.04	-0.0274486	0.147388	-0.186234	0.852261	0.991763	Shank2
ENSRNOG00000012002	152.733	0.0539956	0.247919	0.217796	0.827588	0.991763	Iqgap1
ENSRNOG00000012788	229.575	-0.256133	0.233531	-1.09678	0.272736	0.991763	Clns1a
ENSRNOG00000070086	3.175	-0.412443	1.53157	-0.269294	0.787703	0.991763
ENSRNOG00000020532	8.02066	0.701186	1.00027	0.700993	0.483307	0.991763	Kcnq1
ENSRNOG00000019418	2236.35	-0.0774113	0.132003	-0.586435	0.557583	0.991763	Lrrc4b
ENSRNOG00000031178	3.12483	-0.505438	1.64057	-0.308087	0.758016	0.991763	LOC100362054
ENSRNOG00000042308	5.08824	1.12517	1.09825	1.02452	0.305592	0.991763	Zfp455l1
ENSRNOG00000012574	72.5713	-0.19675	0.327031	-0.601625	0.547424	0.991763	Pum3
ENSRNOG00000047040	6.92829	-1.1131	1.19238	-0.933514	0.350555	0.991763
ENSRNOG00000001500	234.702	-0.4049	0.284554	-1.42293	0.154757	0.991763	Rab4b
ENSRNOG00000016737	13.2427	1.1903	0.730541	1.62934	0.103242	0.991763	Tcerg1l
ENSRNOG00000019413	26.3961	0.1174	0.496434	0.236486	0.813055	0.991763	Atg16l2
ENSRNOG00000068445	30.0992	0.466343	0.503806	0.92564	0.354633	0.991763	Rplp2
ENSRNOG00000015844	282.374	0.153753	0.195446	0.786679	0.43147	0.991763	Snrpd2
ENSRNOG00000068953	26.4169	0.0816132	0.568298	0.14361	0.885808	0.991763
ENSRNOG00000017963	67.455	-0.7621	0.374744	-2.03365	0.0419867	0.991763	RGD1566325
ENSRNOG00000017963	67.455	-0.7621	0.374744	-2.03365	0.0419867	0.991763	LOC682870
ENSRNOG00000019532	500.6	0.365707	0.164469	2.22356	0.0261782	0.991763	Emc10
ENSRNOG00000015217	93.1162	-0.166345	0.283619	-0.586507	0.557535	0.991763	Ltv1
ENSRNOG00000016267	439.817	0.0443707	0.171653	0.258491	0.796028	0.991763	Chst15
ENSRNOG00000021510	2.49523	1.34705	1.54395	0.87247	0.382952	0.991763	Tbc1d10c
ENSRNOG00000020425	445.903	0.0594381	0.185801	0.319902	0.749043	0.991763	Stim1
ENSRNOG00000064833	1.66396	-3.99417	2.72887	-1.46367	0.143284	0.991763
ENSRNOG00000017383	143.538	-0.0610855	0.263713	-0.231636	0.816821	0.991763	Hikeshi
ENSRNOG00000028041	2.30207	1.54137	1.75617	0.877688	0.380113	0.991763	Tnnt1
ENSRNOG00000016462	53.7102	-0.431211	0.481101	-0.896302	0.370092	0.991763	LOC102547287
ENSRNOG00000067828	0.163464	-0.569836	4.08047	-0.139649	0.888937	0.991763
ENSRNOG00000010664	97.5983	-0.162688	0.306817	-0.530245	0.595942	0.991763	Wdr73
ENSRNOG00000019424	20.7417	0.0550291	0.556487	0.0988866	0.921228	0.991763	Aspdh
ENSRNOG00000016790	370.323	0.121655	0.177171	0.686654	0.492301	0.991763	Kmt5b
ENSRNOG00000039730	133.048	-0.0415917	0.268713	-0.154781	0.876994	0.991763	Orai3
ENSRNOG00000014902	7.07449	0.85258	0.944881	0.902315	0.36689	0.991763	Stx11
ENSRNOG00000020949	7.25137	0.219048	0.953735	0.229674	0.818345	0.991763	Hsd17b14
ENSRNOG00000013358	57.1683	0.399382	0.383196	1.04224	0.2973	0.991763	Aqp11
ENSRNOG00000049259	55.8949	-0.825879	0.392833	-2.10237	0.0355209	0.991763	LOC102549842
ENSRNOG00000023091	0.133448	1.34798	4.07966	0.330416	0.741086	0.991763
ENSRNOG00000015860	19.5685	-0.332582	0.713101	-0.466388	0.640938	0.991763	Gipr
ENSRNOG00000018517	26.333	-0.835559	0.552788	-1.51154	0.130652	0.991763	Trim21
ENSRNOG00000001499	1.12724	-0.739895	2.58722	-0.285981	0.774893	0.991763	Mia
ENSRNOG00000050554	6.0315	-1.87499	1.09772	-1.70807	0.0876233	0.991763	C1h10orf143
ENSRNOG00000021206	262.207	0.559199	0.25393	2.20218	0.0276526	0.991763	Plaat3
ENSRNOG00000030281	15.5021	0.111431	0.756618	0.147275	0.882915	0.991763	Klk10
ENSRNOG00000069921	48.8477	-0.413064	0.387485	-1.06601	0.286419	0.991763	Zfp748
ENSRNOG00000018514	0.133448	1.34798	4.07966	0.330416	0.741086	0.991763	Or51r1
ENSRNOG00000016054	459.588	0.036335	0.176698	0.205633	0.837077	0.991763	Tab2
ENSRNOG00000020956	74.5975	0.820606	0.343796	2.3869	0.0169913	0.991763	Bcat2
ENSRNOG00000001501	64.4646	0.237425	0.367261	0.646474	0.517972	0.991763	Snrpa
ENSRNOG00000020417	450.935	-0.0966813	0.176904	-0.54652	0.584709	0.991763	Gsk3a
ENSRNOG00000069434	38.8371	-0.300474	0.424192	-0.708344	0.478732	0.991763
ENSRNOG00000013877	15.4158	-0.144138	0.691841	-0.20834	0.834963	0.991763	Ttc23
ENSRNOG00000064721	270.999	-0.311853	0.200344	-1.55659	0.119568	0.991763	Rgmb
ENSRNOG00000018878	190.338	0.041758	0.257505	0.162164	0.871177	0.991763	Ssh3
ENSRNOG00000020410	6.3389	1.28387	1.11979	1.14654	0.251573	0.991763	Th
ENSRNOG00000014852	62.7433	-0.630846	0.384013	-1.64277	0.10043	0.991763	Fbxo30
ENSRNOG00000037715	58.4424	-0.0929837	0.423272	-0.219679	0.826122	0.991763	Actmap
ENSRNOG00000065723	0.430234	-0.540396	3.80107	-0.14217	0.886946	0.991763	Vom1r45
ENSRNOG00000064980	0.133448	1.34798	4.07966	0.330416	0.741086	0.991763
ENSRNOG00000020793	205.147	0.0873082	0.215515	0.405113	0.685394	0.991763	Ruvbl2
ENSRNOG00000047145	33.1857	-0.790644	0.474275	-1.66706	0.0955032	0.991763	LOC102551340
ENSRNOG00000065613	1.73607	-0.303219	2.24149	-0.135276	0.892394	0.991763	LOC120100104
ENSRNOG00000019442	153.036	0.190777	0.2776	0.687235	0.491935	0.991763	Josd2
ENSRNOG00000015152	0.533794	2.7861	3.99973	0.696573	0.48607	0.991763	Pkp3
ENSRNOG00000066612	0.133322	-0.569836	4.08047	-0.139649	0.888937	0.991763
ENSRNOG00000016935	306.949	-0.107436	0.205896	-0.5218	0.60181	0.991763	Mapk1ip1
ENSRNOG00000018531	130.072	-0.0867812	0.270984	-0.320245	0.748783	0.991763	Mrps11
ENSRNOG00000020426	213.316	-0.0575894	0.266628	-0.215992	0.828994	0.991763	Erf
ENSRNOG00000016038	8.32508	0.247228	0.977684	0.252871	0.800368	0.991763	Mgmt
ENSRNOG00000016611	379.38	-0.0824331	0.209632	-0.393227	0.694152	0.991763	Hras
ENSRNOG00000056118	1525.72	0.147778	0.17887	0.826176	0.408705	0.991763	Cic
ENSRNOG00000019127	67.2994	-0.0814665	0.329426	-0.247298	0.804678	0.991763	Zfp606
ENSRNOG00000046353	17.6041	-0.348407	0.651227	-0.535002	0.592649	0.991763	Zfp273l-ps1
ENSRNOG00000023150	3204.3	0.0219708	0.129844	0.169209	0.865632	0.991763	Gpi
ENSRNOG00000047229	53.674	0.259609	0.386614	0.671494	0.501906	0.991763	Trim68
ENSRNOG00000022313	2.64526	0.95565	1.80528	0.529364	0.596553	0.991763	Klk9
ENSRNOG00000015086	1.29884	1.18279	2.47195	0.478484	0.632306	0.991763	Plin1
ENSRNOG00000062741	12.3218	0.429797	0.740764	0.580208	0.561774	0.991763	Ldhal6b
ENSRNOG00000019280	0.563809	1.43145	3.71751	0.385056	0.700196	0.991763	C1h19orf18
ENSRNOG00000020587	102.507	0.830081	0.277825	2.98778	0.00281008	0.991763	Efemp2
ENSRNOG00000027240	1958.92	0.145159	0.130777	1.10998	0.267009	0.991763	Kndc1
ENSRNOG00000020411	349.65	-0.0663361	0.229258	-0.289351	0.772313	0.991763	Sec23ip
ENSRNOG00000065701	0.266643	-1.36505	4.04744	-0.337263	0.735919	0.991763	Izumo2
ENSRNOG00000063592	4.66431	-1.03651	1.27034	-0.815929	0.414541	0.991763	Lyve1
ENSRNOG00000016973	18.2722	0.0641967	0.597904	0.107369	0.914496	0.991763	Tmem242
ENSRNOG00000015293	2.55223	-0.463639	1.62258	-0.285742	0.775075	0.991763	Dynlt2
ENSRNOG00000049232	65.3022	0.182117	0.406552	0.447956	0.654185	0.991763	Tcf7l2
ENSRNOG00000019318	480.559	0.274623	0.210908	1.3021	0.192882	0.991763	Syt3
ENSRNOG00000018547	102.556	-0.152611	0.276483	-0.551973	0.580967	0.991763	Mrpl46
ENSRNOG00000018580	67.5023	-0.128715	0.32701	-0.393612	0.693867	0.991763	Klk8
ENSRNOG00000042592	154.692	0.0514162	0.249405	0.206155	0.83667	0.991763	Rgs10
ENSRNOG00000050831	0.133448	1.34798	4.07966	0.330416	0.741086	0.991763	Vom2r35
ENSRNOG00000050831	0.133448	1.34798	4.07966	0.330416	0.741086	0.991763	Vom2r36
ENSRNOG00000064244	4.49089	-1.30384	1.3488	-0.966673	0.333708	0.991763	LOC102552823
ENSRNOG00000020481	26.0789	0.435702	0.542169	0.803629	0.421611	0.991763	Pafah1b3
ENSRNOG00000043154	0.163464	-0.569836	4.08047	-0.139649	0.888937	0.991763	Prr19
ENSRNOG00000018606	0.757161	-1.60465	3.06351	-0.523794	0.600422	0.991763	Olr59
ENSRNOG00000018664	1.55409	-2.71067	2.62582	-1.03231	0.301926	0.991763	Klk7
ENSRNOG00000013823	0.3703	0.402201	4.07904	0.0986019	0.921454	0.991763	Cers3
ENSRNOG00000019501	143.848	-0.0574524	0.290617	-0.197691	0.843287	0.991763	Rmnd1
ENSRNOG00000017897	13.8657	-0.510618	0.708687	-0.720512	0.47121	0.991763	Adam8
ENSRNOG00000016791	142.321	0.158601	0.240199	0.660289	0.509069	0.991763	Chka
ENSRNOG00000021058	107.967	0.176146	0.288191	0.611212	0.541059	0.991763	Grwd1
ENSRNOG00000012692	72.4495	0.20844	0.361845	0.576049	0.564582	0.991763	Riok2
ENSRNOG00000013351	896.027	0.0200158	0.148729	0.134578	0.892945	0.991763	Stxbp5
ENSRNOG00000017509	47.686	0.186643	0.391259	0.477031	0.63334	0.991763	Eed
ENSRNOG00000018515	31.6631	-0.0986013	0.529827	-0.186101	0.852366	0.991763	Det1
ENSRNOG00000031927	110.86	-0.35577	0.396541	-0.897184	0.369621	0.991763	Klk6
ENSRNOG00000022164	29.021	0.101644	0.548214	0.18541	0.852907	0.991763	Zscan2
ENSRNOG00000021063	91.733	0.569158	0.355014	1.6032	0.108891	0.991763	Grin2d
ENSRNOG00000013407	43.805	-0.281779	0.537867	-0.523883	0.60036	0.991763	Slc5a11
ENSRNOG00000039076	146.44	-0.027274	0.266107	-0.102492	0.918366	0.991763	Spaca6
ENSRNOG00000019489	68.6552	-0.279146	0.357849	-0.780065	0.435353	0.991763	Armt1
ENSRNOG00000014951	0.828358	3.35955	3.17346	1.05864	0.289764	0.991763	Mesp1
ENSRNOG00000031739	34.0781	-0.389784	0.462902	-0.842043	0.399764	0.991763	Garin5a
ENSRNOG00000020235	1073.87	0.108918	0.143023	0.761544	0.446332	0.991763	Hnrnpl
ENSRNOG00000021130	309.508	0.175094	0.201815	0.867597	0.385615	0.991763	Abcc8
ENSRNOG00000019999	0.498407	1.23212	3.6047	0.341808	0.732495	0.991763	Lypd3
ENSRNOG00000014925	7.9886	0.656006	0.99712	0.657901	0.510602	0.991763	Mesp2
ENSRNOG00000021017	475.319	0.173354	0.232963	0.744126	0.4568	0.991763	Car11
ENSRNOG00000010994	12.9837	0.147596	0.870085	0.169634	0.865298	0.991763	Has1
ENSRNOG00000054336	0.133448	1.34798	4.07966	0.330416	0.741086	0.991763	Majin
ENSRNOG00000015830	0.517659	-0.524294	3.55376	-0.147532	0.882712	0.991763	Ano9
ENSRNOG00000012988	490.378	-0.268813	0.204487	-1.31457	0.188654	0.991763	Lix1
ENSRNOG00000021027	425.461	-0.0247441	0.183837	-0.134598	0.89293	0.991763	Dbp
ENSRNOG00000042686	18.8431	-1.67803	0.727156	-2.30767	0.0210177	0.991763	Trim34
ENSRNOG00000009922	17.5849	0.362555	0.827771	0.437989	0.661394	0.991763	Prlhr
ENSRNOG00000014610	8.43523	-0.371681	0.969294	-0.383455	0.701382	0.991763	Anpep
ENSRNOG00000020882	45.4411	0.564958	0.378148	1.49401	0.135173	0.991763	Shkbp1
ENSRNOG00000019627	28.5196	-0.159989	0.515877	-0.31013	0.756462	0.991763	Mybpc2
ENSRNOG00000015488	39.247	-0.386948	0.413091	-0.936715	0.348905	0.991763	Tead1
ENSRNOG00000015609	49.7471	-0.242926	0.433731	-0.560085	0.575422	0.991763	Wdr27
ENSRNOG00000030776	376.645	0.194695	0.209572	0.929012	0.352883	0.991763	Sytl2
ENSRNOG00000020308	246.49	0.44103	0.205406	2.14712	0.031784	0.991763	Ech1
ENSRNOG00000021032	348.124	0.426383	0.199696	2.13516	0.0327477	0.991763	Sphk2
ENSRNOG00000042705	0.463273	2.50636	4.01923	0.62359	0.532897	0.991763	Zc2hc1b
ENSRNOG00000017191	42.4875	-0.0818686	0.415952	-0.196822	0.843967	0.991763	Trim5
ENSRNOG00000017191	42.4875	-0.0818686	0.415952	-0.196822	0.843967	0.991763	Trim30d
ENSRNOG00000016624	0.498407	1.23212	3.6047	0.341808	0.732495	0.991763
ENSRNOG00000070392	104.925	0.0822019	0.291344	0.282147	0.777831	0.991763	Spty2d1
ENSRNOG00000018864	0.277327	-1.41403	4.04283	-0.349763	0.726517	0.991763	Klk4
ENSRNOG00000018369	15.6366	-0.647987	0.696191	-0.930761	0.351977	0.991763	Prx
ENSRNOG00000025587	9.47667	-0.459872	0.828209	-0.555261	0.578716	0.991763	Plagl1
ENSRNOG00000023053	612.02	-0.189963	0.156016	-1.21759	0.22338	0.991763	Ice1
ENSRNOG00000033498	56.0921	-0.306742	0.383465	-0.799923	0.423755	0.991763	Cib1
ENSRNOG00000070184	15.0688	0.156172	0.719833	0.216956	0.828243	0.991763	LOC100125364
ENSRNOG00000065015	31.5554	0.351781	0.49888	0.70514	0.480723	0.991763
ENSRNOG00000019432	3.953	-1.87099	1.51705	-1.23331	0.217459	0.991763	Lypd5
ENSRNOG00000012460	13.7452	0.360572	0.661642	0.544966	0.585777	0.991763	Cntf
ENSRNOG00000031202	0.220873	1.36397	4.07904	0.334385	0.738089	0.991763	Trim30c
ENSRNOG00000063141	2.25675	1.32438	1.89624	0.698427	0.48491	0.991763	Vom1r46
ENSRNOG00000026163	745.941	0.178155	0.188229	0.946479	0.343904	0.991763	Cpt1c
ENSRNOG00000040242	60.9917	-0.119567	0.401844	-0.297545	0.76605	0.991763	Epm2a
ENSRNOG00000021035	1044.29	0.206452	0.142347	1.45034	0.146962	0.991763	Rpl18
ENSRNOG00000020675	264.183	0.18275	0.209115	0.873922	0.382161	0.991763	Ccdc97
ENSRNOG00000012036	187.175	0.0630945	0.242864	0.259793	0.795024	0.991763	Pcsk5
ENSRNOG00000021800	2.90449	1.53414	1.53226	1.00123	0.316715	0.991763	Zfp541
ENSRNOG00000020683	583.056	0.114647	0.168778	0.679277	0.496962	0.991763	Hnrnpul1
ENSRNOG00000019283	12.0621	-0.41019	0.824243	-0.497657	0.618726	0.991763	P2ry2
ENSRNOG00000055650	29.8708	-0.152846	0.460588	-0.331851	0.740002	0.991763	Pou2f2
ENSRNOG00000064293	101.877	-0.198818	0.301577	-0.659261	0.509728	0.991763	Gdpgp1
ENSRNOG00000021039	1.32165	2.86815	2.76128	1.0387	0.298942	0.991763	Fam83e
ENSRNOG00000014434	204.72	-0.198374	0.20713	-0.957729	0.338199	0.991763	Chd1
ENSRNOG00000014290	612.874	0.317854	0.178891	1.77681	0.0756	0.991763	Grm1
ENSRNOG00000020812	296.381	0.189933	0.234554	0.809762	0.418077	0.991763	Gys1
ENSRNOG00000020546	82.591	-0.0334364	0.308237	-0.108476	0.913618	0.991763	Lipe
ENSRNOG00000012524	565.575	-0.227961	0.167524	-1.36077	0.173586	0.991763	Zfp91
ENSRNOG00000042777	56.3418	0.19014	0.363625	0.522901	0.601043	0.991763	Zfp28
ENSRNOG00000042777	56.3418	0.19014	0.363625	0.522901	0.601043	0.991763	Zfp78
ENSRNOG00000012103	12.1488	-0.515711	0.795155	-0.648567	0.516619	0.991763	Nmbr
ENSRNOG00000019728	140.907	0.282015	0.312583	0.902209	0.366946	0.991763	Itgam
ENSRNOG00000063232	0.359537	0.402201	4.07904	0.0986019	0.921454	0.991763
ENSRNOG00000046874	110.019	0.359068	0.286712	1.25237	0.210436	0.991763	Snx9
ENSRNOG00000027405	383.248	0.15326	0.223861	0.68462	0.493583	0.991763	Ccp110
ENSRNOG00000020538	0.817595	3.3402	2.93479	1.13814	0.255063	0.991763
ENSRNOG00000021046	24.3787	0.0822865	0.579698	0.141947	0.887122	0.991763	Sult2b1
ENSRNOG00000015660	99.7219	-0.216868	0.297893	-0.728007	0.466609	0.991763	Pex3
ENSRNOG00000067569	0.975287	1.38735	2.75898	0.502849	0.615071	0.991763	Vom1r47
ENSRNOG00000017854	198.56	-0.0650029	0.255286	-0.254628	0.799011	0.991763	Ucp2
ENSRNOG00000001488	522.052	0.144737	0.186137	0.777581	0.436816	0.991763	Psmb1
ENSRNOG00000020713	75.6139	0.378438	0.328905	1.1506	0.249896	0.991763	Osbpl5
ENSRNOG00000070095	1.65943	2.32259	2.12366	1.09367	0.274098	0.991763
ENSRNOG00000067308	4.59147	1.5448	1.32324	1.16744	0.243034	0.991763
ENSRNOG00000046983	32.0928	0.143204	0.503071	0.284659	0.775906	0.991763	Adat2
ENSRNOG00000012611	21.235	0.575822	0.601747	0.956917	0.338609	0.991763	Lpxn
ENSRNOG00000018773	29.8982	-0.592841	0.491865	-1.20529	0.228091	0.991763	Mtrf1l
ENSRNOG00000010853	182.797	-0.369265	0.242073	-1.52543	0.127153	0.991763	Chrna7
ENSRNOG00000019555	263.676	0.276154	0.220122	1.25455	0.209642	0.991763	Arap1
ENSRNOG00000020876	115.236	0.515263	0.272914	1.888	0.0590258	0.991763	Bax
ENSRNOG00000012092	0.563429	-2.43076	3.66709	-0.662856	0.507423	0.991763	Gje1
ENSRNOG00000037814	4.71739	0.824504	1.11991	0.736225	0.461594	0.991763	Cxcl17
ENSRNOG00000034184	28.9778	-0.138473	0.539834	-0.256511	0.797556	0.991763	Zfp583
ENSRNOG00000020233	1016.63	0.365639	0.166246	2.19939	0.02785	0.991763	Rabac1
ENSRNOG00000018808	47.8205	-0.645548	0.398431	-1.62023	0.105183	0.991763	Vip
ENSRNOG00000020883	79.072	-0.119829	0.320651	-0.373706	0.708623	0.991763	Dhdh
ENSRNOG00000001489	55.1157	0.0454158	0.404117	0.112383	0.91052	0.991763	Tbp
ENSRNOG00000024414	284.569	0.157367	0.233551	0.6738	0.500438	0.991763	Ate1
ENSRNOG00000046971	5.62695	-0.506846	1.17569	-0.431105	0.666392	0.991763	Ccer2
ENSRNOG00000027784	19.3109	-0.766712	0.649215	-1.18098	0.23761	0.991763	Tsku
ENSRNOG00000021048	990.581	0.193144	0.186169	1.03747	0.299516	0.991763	Lmtk3
ENSRNOG00000011540	183.859	-0.0389391	0.252679	-0.154105	0.877527	0.991763	Vta1
ENSRNOG00000020063	68.7971	0.358908	0.334524	1.07289	0.28332	0.991763	Nfkbib
ENSRNOG00000023528	2.05085	0.923459	2.09844	0.440069	0.659887	0.991763	Plaat5
ENSRNOG00000064702	1.61291	2.16186	2.04465	1.05732	0.290364	0.991763	Eddm13
ENSRNOG00000017678	280.818	-0.0524996	0.221926	-0.236563	0.812996	0.991763	Ap2b1-ps1
ENSRNOG00000011476	66.5339	-0.56605	0.39716	-1.42524	0.154087	0.991763	Nars2
ENSRNOG00000052220	1.20037	-2.24899	2.44044	-0.921552	0.356762	0.991763	Ccdc83
ENSRNOG00000024460	136.837	-0.250581	0.261168	-0.95946	0.337327	0.991763	Tars3
ENSRNOG00000020982	191.353	0.553851	0.260007	2.13014	0.0331603	0.991763	Fau
ENSRNOG00000001490	16.9183	-0.105789	0.607063	-0.174263	0.861659	0.991763	Pdcd2
ENSRNOG00000022129	1.04696	2.48425	2.97834	0.834107	0.404221	0.991763	Galp
ENSRNOG00000011480	146.884	-0.0318014	0.303547	-0.104766	0.916562	0.991763	Tubgcp5
ENSRNOG00000020578	18.8815	-0.518918	0.588823	-0.88128	0.378166	0.991763	Ceacam1
ENSRNOG00000012872	21.2911	-0.969509	0.617893	-1.56906	0.116634	0.991763	Carnmt1
ENSRNOG00000010087	46.9064	-0.225942	0.40841	-0.553222	0.580111	0.991763	Zfp143
ENSRNOG00000020889	1022.83	-0.176146	0.134518	-1.30946	0.190378	0.991763	Nucb1
ENSRNOG00000047575	96.5665	0.444076	0.350852	1.26571	0.205618	0.991763	Dhx34
ENSRNOG00000061450	164.74	-0.391344	0.244446	-1.60094	0.10939	0.991763	Homer2
ENSRNOG00000020102	850.223	0.110478	0.152976	0.72219	0.470178	0.991763	Sirt2
ENSRNOG00000017429	3.81599	0.456223	1.26902	0.359507	0.719216	0.991763	Lat
ENSRNOG00000010753	252.704	0.121633	0.207926	0.584985	0.558558	0.991763	Aig1
ENSRNOG00000020605	56.0663	0.240988	0.35512	0.67861	0.497385	0.991763	Pstk
ENSRNOG00000012576	162.346	-0.0272929	0.256217	-0.106522	0.915168	0.991763	Selenos
ENSRNOG00000015517	130.042	-0.0334637	0.297974	-0.112304	0.910582	0.991763	Zfp444
ENSRNOG00000017030	1486.79	0.017087	0.151637	0.112684	0.910281	0.991763	Arid1b
ENSRNOG00000025644	28.3723	0.212869	0.541584	0.393049	0.694283	0.991763	C1h9orf40
ENSRNOG00000013663	41.9719	0.69692	0.487732	1.4289	0.153033	0.991763	Tmem86a
ENSRNOG00000014166	7.67435	0.813451	0.951753	0.854687	0.392725	0.991763	Smoc2
ENSRNOG00000047035	51.6367	0.189761	0.39593	0.47928	0.63174	0.991763	Fadd
ENSRNOG00000015658	1116.23	0.121914	0.138341	0.881257	0.378179	0.991763	Sorbs1
ENSRNOG00000024580	21.2773	0.81453	0.605292	1.34568	0.178405	0.991763	Mamstr
ENSRNOG00000066760	0.711264	-1.23591	3.41739	-0.361653	0.717611	0.991763
ENSRNOG00000066678	1.47528	-2.71662	2.25324	-1.20565	0.227953	0.991763
ENSRNOG00000014791	3573.8	-0.213676	0.1257	-1.69988	0.0891535	0.991763	Peg3
ENSRNOG00000019249	1488.11	-0.0648229	0.139088	-0.466058	0.641174	0.991763	Ap3b2
ENSRNOG00000069065	2.79029	1.04323	1.58923	0.656437	0.511543	0.991763	Fam181b
ENSRNOG00000011290	144.376	-0.13408	0.288185	-0.465256	0.641748	0.991763	Tm2d3
ENSRNOG00000019485	485.685	0.29124	0.171373	1.69945	0.0892342	0.991763	Bckdk
ENSRNOG00000019485	485.685	0.29124	0.171373	1.69945	0.0892342	0.991763	Kat8
ENSRNOG00000020990	0.296912	0.38621	4.07966	0.0946672	0.924579	0.991763
ENSRNOG00000015822	1093.91	0.233217	0.181917	1.282	0.199844	0.991763	Klf13
ENSRNOG00000047279	0.430107	-2.03897	3.99555	-0.51031	0.609834	0.991763	Pga5
ENSRNOG00000015456	48.6889	-0.1419	0.451998	-0.313938	0.753568	0.991763	Zfp787
ENSRNOG00000066654	0.460376	-0.665162	4.02408	-0.165295	0.868711	0.991763	Vom2r-ps24
ENSRNOG00000020995	0.598912	-2.51031	3.27955	-0.765443	0.444008	0.991763	Fut1
ENSRNOG00000020310	1538.25	0.167752	0.187034	0.896908	0.369768	0.991763	Grik5
ENSRNOG00000020669	5.23567	-0.831375	1.1129	-0.747032	0.455045	0.991763	Ovol1
ENSRNOG00000020699	38.72	0.612856	0.500676	1.22406	0.220931	0.991763	Cd37
ENSRNOG00000021507	275.06	-0.537896	0.241647	-2.22595	0.0260172	0.991763	Luzp2
ENSRNOG00000036981	2.60294	-2.29092	1.97774	-1.15835	0.246722	0.991763	LOC100360933
ENSRNOG00000006962	489.035	0.0804995	0.187126	0.430188	0.667059	0.991763	Stk32c
ENSRNOG00000018012	1362.78	-0.0557976	0.14053	-0.397052	0.691329	0.991763	Tulp4
ENSRNOG00000069456	9.03676	-1.09988	0.860193	-1.27865	0.201022	0.991763
ENSRNOG00000015180	94.1183	0.254264	0.310264	0.819508	0.412496	0.991763	Kdm8
ENSRNOG00000013123	98.8007	-0.357659	0.339656	-1.05301	0.292338	0.991763	Scube2
ENSRNOG00000064904	0.163464	-0.569836	4.08047	-0.139649	0.888937	0.991763	Vom1r41
ENSRNOG00000020164	55.7854	0.250602	0.37623	0.666087	0.505355	0.991763	Ifitm10
ENSRNOG00000025354	2.04407	-1.07969	1.95065	-0.553502	0.57992	0.991763	Rinl
ENSRNOG00000016769	10.1776	-1.33479	0.817577	-1.63261	0.102551	0.991763	Rab38
ENSRNOG00000031662	4.05496	-2.57619	1.62458	-1.58575	0.112796	0.991763	Slc6a5
ENSRNOG00000026861	118.621	-0.129433	0.315493	-0.410258	0.681617	0.991763	Zscan18
ENSRNOG00000014465	3.72454	-0.148776	1.57908	-0.0942173	0.924937	0.991763	Oca2
ENSRNOG00000029049	511.982	-0.0239538	0.23797	-0.100659	0.919821	0.991763	Zdhhc14
ENSRNOG00000017220	76.2107	-0.273459	0.441036	-0.620037	0.535233	0.991763	Tcirg1
ENSRNOG00000016490	0.826084	2.06699	3.23709	0.638535	0.523125	0.991763	Nox3
ENSRNOG00000014779	257.872	-0.285584	0.212036	-1.34686	0.178024	0.991763	Pdcd4
ENSRNOG00000031459	67.8138	-0.676032	0.338315	-1.99823	0.0456917	0.991763	Znf8
ENSRNOG00000021011	10.432	0.30409	0.804465	0.378003	0.705428	0.991763	Fut2
ENSRNOG00000055761	292.988	0.0625738	0.197978	0.316064	0.751954	0.991763	Zfp574
ENSRNOG00000009891	312.996	0.0321788	0.192699	0.16699	0.867378	0.991763	Pcf11
ENSRNOG00000011058	431.519	-0.0255636	0.192565	-0.132753	0.894389	0.991763	Utrn
ENSRNOG00000018321	1.64802	-0.454345	2.47837	-0.183324	0.854544	0.991763	Sytl3
ENSRNOG00000067810	2.35367	0.755542	1.78458	0.423372	0.672024	0.991763	Or6f2
ENSRNOG00000047019	15.9596	-0.476801	0.692929	-0.688095	0.491393	0.991763	Bbip1
ENSRNOG00000011077	1067.69	-0.203885	0.145264	-1.40355	0.160454	0.991763	Tjp1
ENSRNOG00000052687	2127.58	0.157871	0.137659	1.14682	0.251456	0.991763	Megf8
ENSRNOG00000019453	895.118	0.234237	0.140527	1.66684	0.0955454	0.991763	Rps5
ENSRNOG00000014227	2.2765	-0.714089	1.73998	-0.410401	0.681512	0.991763	Mrgprx3
ENSRNOG00000015339	214.872	-0.109841	0.207181	-0.530169	0.595995	0.991763	Shoc2
ENSRNOG00000051208	1.9506	1.10942	1.96956	0.563286	0.57324	0.991763	Selenov
ENSRNOG00000016697	26.5138	0.67892	0.600899	1.12984	0.258544	0.991763	Lrrc56
ENSRNOG00000038445	0.296912	0.38621	4.07966	0.0946672	0.924579	0.991763	Rnf225
ENSRNOG00000020779	0.825207	-1.52716	2.95546	-0.516726	0.605347	0.991763	Kcna7
ENSRNOG00000020206	1208.57	0.140103	0.146586	0.955774	0.339186	0.991763	Ctsd
ENSRNOG00000021014	9.49379	-0.528777	1.04934	-0.503913	0.614322	0.991763	Sec1
ENSRNOG00000027436	88.5577	-0.132042	0.287519	-0.459248	0.646056	0.991763	Zfp324
ENSRNOG00000062814	1005.85	-0.0626291	0.202113	-0.309872	0.756658	0.991763	Cend1
ENSRNOG00000018524	469.028	0.239186	0.195359	1.22434	0.220823	0.991763	Ezr
ENSRNOG00000016147	142.613	-0.656061	0.303333	-2.16284	0.0305537	0.991763	Slc17a6
ENSRNOG00000021056	62.1385	0.723931	0.410507	1.7635	0.0778156	0.991763	Kcnj14
ENSRNOG00000037638	218	0.155227	0.237764	0.652863	0.513845	0.991763	Timm50
ENSRNOG00000019199	12.5852	-0.131782	0.760351	-0.173318	0.862402	0.991763	Cracr2b
ENSRNOG00000015218	43.286	0.212501	0.406153	0.523203	0.600833	0.991763	Nsmce1
ENSRNOG00000050207	0.463273	2.50636	4.01923	0.62359	0.532897	0.991763	Utf1
ENSRNOG00000015030	343.429	0.247898	0.246377	1.00617	0.314332	0.991763	Tjp2
ENSRNOG00000011015	2847.65	-0.223482	0.138631	-1.61206	0.106949	0.991763	Hivep2
ENSRNOG00000021020	0.738532	0.544065	3.11629	0.174588	0.861404	0.991763	Gpha2
ENSRNOG00000019338	2.2534	-1.11318	1.79205	-0.621177	0.534483	0.991763	Dll3
ENSRNOG00000021016	4.31573	1.59632	1.38661	1.15124	0.249633	0.991763	Ntn5
ENSRNOG00000020700	98.7126	0.342737	0.336427	1.01876	0.308318	0.991763
ENSRNOG00000064437	2.07578	-0.612843	1.95672	-0.313199	0.754129	0.991763
ENSRNOG00000016327	26.305	-0.57257	0.535811	-1.0686	0.285248	0.991763	Mcee
ENSRNOG00000020044	114.663	0.113576	0.294766	0.385308	0.700009	0.991763	Mob2
ENSRNOG00000016595	6.31994	-0.828113	1.08886	-0.760532	0.446937	0.991763	Hhex
ENSRNOG00000060021	2.10905	1.36019	1.76915	0.768836	0.441991	0.991763	Txlnb
ENSRNOG00000037798	8.72797	-0.4673	1.08965	-0.428855	0.668029	0.991763	Erich4
ENSRNOG00000060610	0.430234	-0.540396	3.80107	-0.14217	0.886946	0.991763	LOC120098792
ENSRNOG00000052810	0.76543	3.28796	3.24899	1.012	0.31154	0.991763	Cyp2c11
ENSRNOG00000017681	0.133322	-0.569836	4.08047	-0.139649	0.888937	0.991763	Lim2
ENSRNOG00000019616	0.631982	3.0071	3.50032	0.859095	0.390288	0.991763	Prss8
ENSRNOG00000056940	122.251	0.0492358	0.267222	0.18425	0.853817	0.991763	Cited2
ENSRNOG00000016102	2.39864	2.89487	2.12261	1.36382	0.172623	0.991763	Ebf3
ENSRNOG00000055298	1.51195	1.14534	2.34938	0.487508	0.625899	0.991763	Vom2r-ps27
ENSRNOG00000029490	86.6046	0.202964	0.331196	0.612822	0.539994	0.991763	Znf768
ENSRNOG00000009462	47.2746	-0.290269	0.480003	-0.604722	0.545364	0.991763	Ccdc90b
ENSRNOG00000060429	58.6942	0.217582	0.352195	0.617787	0.536716	0.991763	Zfp446
ENSRNOG00000021109	6.91514	1.81331	1.08745	1.66748	0.0954186	0.991763	Odad1
ENSRNOG00000018986	1.90015	-0.872272	2.20407	-0.395755	0.692286	0.991763	Fbxl19
ENSRNOG00000008824	2.35615	0.811972	1.71339	0.473898	0.635573	0.991763	Vax1
ENSRNOG00000063416	10.8885	1.05098	0.92978	1.13036	0.258325	0.991763
ENSRNOG00000051450	70.0138	0.2738	0.319024	0.858244	0.390758	0.991763	Abracl
ENSRNOG00000061012	183.206	0.306865	0.248471	1.23501	0.216826	0.991763	Kat5
ENSRNOG00000021118	920.972	-0.0458526	0.138088	-0.332054	0.739849	0.991763	Nomo1
ENSRNOG00000053735	14.1347	-0.940606	0.683833	-1.37549	0.168979	0.991763	Hebp2
ENSRNOG00000002332	0.163464	-0.569836	4.08047	-0.139649	0.888937	0.991763
ENSRNOG00000015911	140.588	-0.126005	0.255705	-0.492773	0.622173	0.991763	Lrp5
ENSRNOG00000032034	1022.34	-0.0946499	0.169743	-0.557606	0.577113	0.991763	Supt5h
ENSRNOG00000061533	38.047	-0.23441	0.449054	-0.522008	0.601665	0.991763	Zfp945
ENSRNOG00000009664	76.0783	-0.423194	0.337753	-1.25297	0.210218	0.991763	Ankrd42
ENSRNOG00000021025	653.575	0.112831	0.165896	0.680128	0.496424	0.991763	Ppp2r5b
ENSRNOG00000001466	0.490391	-2.21286	3.98558	-0.555216	0.578747	0.991763	Cyp2c55
ENSRNOG00000011994	47.9832	-0.407461	0.437861	-0.930572	0.352075	0.991763	Perp
ENSRNOG00000026572	8.32988	0.195513	0.983852	0.198722	0.84248	0.991763	Zfp473
ENSRNOG00000020719	4.65885	-1.99708	1.31643	-1.51705	0.129255	0.991763	Hrc
ENSRNOG00000019560	2364.45	-0.176154	0.128764	-1.36804	0.171299	0.991763	Pde2a
ENSRNOG00000062718	0.220873	1.36397	4.07904	0.334385	0.738089	0.991763
ENSRNOG00000046480	63.5696	0.569057	0.356639	1.59561	0.110575	0.991763	Zfp764l1
ENSRNOG00000017365	13.1557	0.0885806	0.70416	0.125796	0.899893	0.991763	Klhl35
ENSRNOG00000016807	440.225	-0.101621	0.172815	-0.588034	0.556509	0.991763	Oat
ENSRNOG00000015865	378.511	-0.0690298	0.207057	-0.333385	0.738843	0.991763	Ap2s1
ENSRNOG00000018007	72.5242	-0.296736	0.36387	-0.8155	0.414786	0.991763	Gtf2h5
ENSRNOG00000028753	67.7796	0.0441592	0.350091	0.126136	0.899624	0.991763	B9d2
ENSRNOG00000025375	0.928513	-0.631063	2.64433	-0.238648	0.811379	0.991763
ENSRNOG00000020182	73.1762	-0.288104	0.408063	-0.706027	0.480171	0.991763	Mvp
ENSRNOG00000013190	85.9108	0.350532	0.346005	1.01308	0.31102	0.991763	Rnaset2
ENSRNOG00000013795	133.039	-0.346367	0.265445	-1.30486	0.191942	0.991763	Asb7
ENSRNOG00000060603	611.396	0.20527	0.184295	1.11381	0.265359	0.991763	Nhsl1
ENSRNOG00000019970	114.797	0.286412	0.26907	1.06445	0.287123	0.991763	mrpl11
ENSRNOG00000061348	22.1134	0.761438	0.603887	1.2609	0.207346	0.991763	Fam53b
ENSRNOG00000031003	29.6732	0.494539	0.474136	1.04303	0.296934	0.991763	Zfp764
ENSRNOG00000020652	21.5298	0.30297	0.57384	0.527969	0.597521	0.991763	Tgfb1
ENSRNOG00000060972	307.442	0.0295672	0.183401	0.161216	0.871923	0.991763	Heca
ENSRNOG00000070441	0.79993	-2.94152	3.51812	-0.836104	0.403096	0.991763
ENSRNOG00000011975	80.1452	0.290215	0.321448	0.902837	0.366612	0.991763	Crtc3
ENSRNOG00000019132	80.8424	-0.283468	0.297098	-0.954124	0.340021	0.991763	Fv1
ENSRNOG00000047901	1.50965	-1.35931	2.57954	-0.526959	0.598222	0.991763	Acp7
ENSRNOG00000016368	63.0884	-0.105636	0.338526	-0.312047	0.755005	0.991763	Ppp1r14c
ENSRNOG00000004273	2.50823	0.211455	1.62136	0.130419	0.896235	0.991763	Ifitm1
ENSRNOG00000021145	224.513	-0.0405367	0.237865	-0.170419	0.864681	0.991763	Gpr137
ENSRNOG00000054391	1792.34	-0.102464	0.156194	-0.656002	0.511823	0.991763	Snrpn
ENSRNOG00000054391	1792.34	-0.102464	0.156194	-0.656002	0.511823	0.991763	Snurf
ENSRNOG00000020731	1294.56	0.100586	0.1496	0.672369	0.501349	0.991763	Ppfia3
ENSRNOG00000033343	7.46433	-0.479045	0.908984	-0.527011	0.598186	0.991763	Prss36
ENSRNOG00000070349	0.435575	-0.562974	3.78355	-0.148795	0.881715	0.991763	LOC108349848
ENSRNOG00000019578	806.989	0.10085	0.182781	0.551757	0.581115	0.991763	Rps16
ENSRNOG00000011174	0.888115	3.50796	3.07276	1.14163	0.253607	0.991763	Fpr1
ENSRNOG00000017137	30.1626	0.146303	0.490524	0.298259	0.765506	0.991763	Eef1akmt2
ENSRNOG00000020897	1007.66	0.0939583	0.14188	0.662239	0.507818	0.991763	Prpf19
ENSRNOG00000014186	95.779	-0.0703044	0.306923	-0.229062	0.818821	0.991763	Zswim9
ENSRNOG00000012055	1394.37	0.0969747	0.143342	0.676528	0.498706	0.991763	Man2a2
ENSRNOG00000017753	99.5327	-0.410208	0.306622	-1.33783	0.180952	0.991763	Ercc2
ENSRNOG00000017975	81.4986	-0.0547035	0.337999	-0.161845	0.871428	0.991763	Dnajb13
ENSRNOG00000051915	166.134	-0.105476	0.281288	-0.374977	0.707678	0.991763	Spred3
ENSRNOG00000020746	226.591	0.0331313	0.198056	0.167283	0.867148	0.991763	Lin7b
ENSRNOG00000068342	67.8974	-0.327013	0.347201	-0.941853	0.346268	0.991763	Coa4
ENSRNOG00000026517	212.972	0.242664	0.207666	1.16853	0.242594	0.991763	Vrk3
ENSRNOG00000020991	3.05999	1.48266	1.7152	0.864423	0.387356	0.991763	Ms4a6a
ENSRNOG00000021147	163.252	0.535855	0.228972	2.34026	0.0192703	0.991763	Bad
ENSRNOG00000018106	12.5743	0.194783	0.859689	0.226573	0.820755	0.991763	Neu3
ENSRNOG00000017621	441.689	-0.14525	0.17983	-0.807705	0.41926	0.991763	Spns1
ENSRNOG00000024056	94.5476	0.117858	0.334342	0.352508	0.724457	0.991763	Zfp715
ENSRNOG00000010964	519.892	-0.0634587	0.159211	-0.398583	0.690201	0.991763	Akap13
ENSRNOG00000018411	85.8926	-0.495061	0.366571	-1.35052	0.17685	0.991763	Pold3
ENSRNOG00000023931	7.69075	-0.378954	0.947895	-0.399785	0.689315	0.991763	Ggn
ENSRNOG00000014530	796.397	0.133268	0.160239	0.831685	0.405587	0.991763	Nav2
ENSRNOG00000011675	91.0174	-0.354111	0.308833	-1.14661	0.251544	0.991763	Zfp40
ENSRNOG00000017446	234.481	0.0385762	0.213211	0.18093	0.856423	0.991763	Ndufs8
ENSRNOG00000016244	2506.53	-0.0276142	0.12552	-0.219999	0.825872	0.991763	Mical2
ENSRNOG00000016815	203.727	-0.0571915	0.209382	-0.273145	0.784742	0.991763	Tmem135
ENSRNOG00000018936	36.0225	-0.496171	0.46362	-1.07021	0.284524	0.991763	Zfp780b-ps1
ENSRNOG00000014193	50.9825	-0.521333	0.364433	-1.43053	0.152565	0.991763	Lig1
ENSRNOG00000021659	3.47903	0.901179	1.33906	0.672992	0.500953	0.991763	Acp4
ENSRNOG00000014908	420.479	0.253926	0.243877	1.0412	0.297781	0.991763	Sf3b5
ENSRNOG00000064302	6.62695	-0.252803	1.03478	-0.244307	0.806993	0.991763
ENSRNOG00000018379	42.2029	0.281049	0.447399	0.628184	0.529884	0.991763	Zfp688
ENSRNOG00000019706	0.133322	-0.569836	4.08047	-0.139649	0.888937	0.991763	Phox2a
ENSRNOG00000053084	105.556	0.133113	0.291344	0.456894	0.647747	0.991763	Fuz
ENSRNOG00000064816	0.26677	0.38621	4.07966	0.0946672	0.924579	0.991763	Or2ag19
ENSRNOG00000019254	135.318	-0.287135	0.276675	-1.03781	0.29936	0.991763	Dyrk1b
ENSRNOG00000018101	3.75119	1.44063	1.36791	1.05316	0.292265	0.991763	Klc3
ENSRNOG00000011526	311.2	0.199384	0.214232	0.930695	0.352011	0.991763	Pcsk6
ENSRNOG00000053366	44.3575	-0.0518076	0.40097	-0.129206	0.897195	0.991763	Zfp59
ENSRNOG00000011882	168.784	-0.0779812	0.223479	-0.348942	0.727133	0.991763	Gab2
ENSRNOG00000018766	78.699	0.552495	0.311895	1.77141	0.0764922	0.991763	Rrp8
ENSRNOG00000021103	1959.55	0.120858	0.170004	0.710913	0.477138	0.991763	Nrxn2
ENSRNOG00000017050	3.15715	0.5025	1.50927	0.332942	0.739178	0.991763	Lmntd2
ENSRNOG00000046727	20.4081	-0.552361	0.624978	-0.883808	0.3768	0.991763	Abcc2
ENSRNOG00000049517	67.2935	0.147463	0.341453	0.43187	0.665836	0.991763	Tnfaip3
ENSRNOG00000017512	170.826	0.0374597	0.278764	0.134378	0.893104	0.991763	Aldh3b1
ENSRNOG00000062546	0.996813	1.42129	2.73961	0.518794	0.603905	0.991763
ENSRNOG00000018191	35.3146	-0.632645	0.450981	-1.40282	0.160671	0.991763	Oprm1
ENSRNOG00000063236	23.6481	0.425762	0.724048	0.588029	0.556513	0.991763
ENSRNOG00000037580	272.054	0.200086	0.193874	1.03204	0.302052	0.991763	Psmd8
ENSRNOG00000070428	0.929517	3.54182	3.00815	1.17741	0.239033	0.991763
ENSRNOG00000012074	207.584	0.395197	0.253096	1.56145	0.118417	0.991763	Ifngr1
ENSRNOG00000017012	42.2638	-0.349361	0.462116	-0.756001	0.449648	0.991763	Coq7
ENSRNOG00000022537	0.138663	-0.569836	4.08047	-0.139649	0.888937	0.991763	E2f8
ENSRNOG00000019730	371.492	0.0316452	0.21626	0.14633	0.883661	0.991763	Inppl1
ENSRNOG00000019776	251.403	-0.117539	0.196779	-0.597316	0.550296	0.991763	Sh3gl3
ENSRNOG00000014030	496.866	0.117304	0.172626	0.679525	0.496805	0.991763	Synm
ENSRNOG00000049944	1399.85	0.107223	0.15495	0.691988	0.488945	0.991763	Slc25a22
ENSRNOG00000023968	28.4684	-0.165456	0.554449	-0.298415	0.765387	0.991763	Fancf
ENSRNOG00000026243	1689.09	0.0308957	0.144953	0.213144	0.831215	0.991763	Ap2a1
ENSRNOG00000066277	125.053	0.419614	0.287678	1.45862	0.144669	0.991763	Zfp689
ENSRNOG00000016717	24.2408	0.297578	0.549463	0.541579	0.588109	0.991763	Gas2
ENSRNOG00000055371	1186.46	-0.0373616	0.196047	-0.190575	0.848859	0.991763	Sptbn4
ENSRNOG00000020533	1192.98	0.201507	0.19466	1.03517	0.300589	0.991763	Htra1
ENSRNOG00000059224	446.514	-0.297538	0.182785	-1.6278	0.103567	0.991763	Reps1
ENSRNOG00000018960	4525.83	-0.0628536	0.116375	-0.540096	0.589131	0.991763	Syne1
ENSRNOG00000037080	39.8816	-0.0987787	0.439719	-0.224641	0.822259	0.991763	Adamts17
ENSRNOG00000050453	43.5348	0.78979	0.434554	1.81747	0.0691447	0.991763	Fbxo27
ENSRNOG00000014061	59.3784	-0.0771544	0.38314	-0.201374	0.840406	0.991763	Dusp5
ENSRNOG00000018873	1264.75	-0.0951807	0.143655	-0.662565	0.507609	0.991763	Fam168a
ENSRNOG00000042776	13.8803	0.294789	0.701163	0.420428	0.674173	0.991763	Lins1
ENSRNOG00000021004	72.9157	0.184718	0.327893	0.563349	0.573197	0.991763	Rasip1
ENSRNOG00000063590	52.3928	0.308744	0.382634	0.80689	0.41973	0.991763	Fzd4
ENSRNOG00000018994	288.229	-0.224481	0.220794	-1.0167	0.309297	0.991763	Psmc4
ENSRNOG00000017703	70.6239	0.217291	0.442818	0.490701	0.623638	0.991763	Unc93b1
ENSRNOG00000019746	236.95	-0.0224778	0.203129	-0.110658	0.911888	0.991763	Paf1
ENSRNOG00000013836	63.3094	-0.556684	0.362948	-1.53379	0.125082	0.991763	Arhgap17
ENSRNOG00000011945	664.148	-0.273465	0.149926	-1.824	0.0681527	0.991763	Cyfip1
ENSRNOG00000029366	810.568	0.104217	0.189658	0.549501	0.582662	0.991763	Prrt2
ENSRNOG00000058388	28.5615	0.468275	0.591558	0.791595	0.428597	0.991763	Zfp36
ENSRNOG00000037339	0.163464	-0.569836	4.08047	-0.139649	0.888937	0.991763	Siglec10
ENSRNOG00000017006	0.533667	1.42874	3.79676	0.376307	0.706689	0.991763	Nkx1-2
ENSRNOG00000020848	137.827	0.156349	0.270229	0.578577	0.562875	0.991763	Coq8b
ENSRNOG00000018518	117.788	0.199164	0.283944	0.70142	0.483041	0.991763	Prr14
ENSRNOG00000019702	146.773	-0.0535071	0.23273	-0.229911	0.818161	0.991763	Med29
ENSRNOG00000055142	9.18395	0.356404	0.857053	0.415848	0.677521	0.991763	Ect2l
ENSRNOG00000015829	2.72293	2.93189	1.85122	1.58376	0.113247	0.991763	Trpm1
ENSRNOG00000012690	168.502	0.0578993	0.232308	0.249235	0.803179	0.991763	Nipa2
ENSRNOG00000017097	206.412	0.175808	0.253885	0.692474	0.48864	0.991763	Lhpp
ENSRNOG00000018850	166.268	0.0804056	0.251483	0.319726	0.749176	0.991763	Ttc9b
ENSRNOG00000020486	7.53672	-0.288116	1.00027	-0.288039	0.773317	0.991763	Bcl2l12
ENSRNOG00000060599	1101.37	-0.232835	0.179349	-1.29823	0.19421	0.991763	Gabrb3
ENSRNOG00000042702	539.472	-0.0637196	0.185934	-0.342699	0.731825	0.991763	Nipa1
ENSRNOG00000019949	77.8084	0.317228	0.368687	0.860428	0.389553	0.991763	Mrps12
ENSRNOG00000017878	7.60222	-1.61811	0.967225	-1.67294	0.0943389	0.991763	Aldh1a7
ENSRNOG00000015807	62.5136	0.87729	0.409593	2.14186	0.0322048	0.991763	Pyroxd2
ENSRNOG00000025651	109.617	0.212238	0.294423	0.720862	0.470995	0.991763	Ikzf5
ENSRNOG00000020443	5.69666	3.58671	1.32655	2.70378	0.00685552	0.991763	Tsks
ENSRNOG00000011282	3579.86	0.195667	0.132136	1.4808	0.138659	0.991763	Ppp2r1a
ENSRNOG00000019962	59.2986	-0.0948779	0.361967	-0.262118	0.793231	0.991763	Sars2
ENSRNOG00000023521	941.922	-0.0768669	0.151002	-0.509045	0.610721	0.991763	Map3k10
ENSRNOG00000055028	293.474	0.0983827	0.190944	0.515243	0.606383	0.991763	Setd1a
ENSRNOG00000015560	287.35	-0.525248	0.254804	-2.06138	0.039267	0.991763	Emsy
ENSRNOG00000032723	92.6122	0.179259	0.2875	0.623508	0.532951	0.991763	Efl1
ENSRNOG00000043388	116.426	0.0350931	0.265219	0.132317	0.894733	0.991763	Irf3
ENSRNOG00000042728	270.397	0.0627194	0.197073	0.318254	0.750292	0.991763	Fbrs
ENSRNOG00000011460	1329.54	-0.158673	0.149781	-1.05937	0.289433	0.991763	Arfgef3
ENSRNOG00000013009	960.419	0.0188303	0.158668	0.118678	0.905531	0.991763	Ldha
ENSRNOG00000020615	364.286	0.0853355	0.175003	0.487623	0.625817	0.991763	Nap1l4
ENSRNOG00000011011	31.287	0.658902	0.468748	1.40567	0.159824	0.991763	Nmb
ENSRNOG00000017109	8.76145	0.621746	0.838253	0.741716	0.458259	0.991763	Rassf7
ENSRNOG00000021117	210.936	0.16413	0.247624	0.662818	0.507447	0.991763	Rps6ka4
ENSRNOG00000025378	6.98	2.26318	1.21746	1.85894	0.0630358	0.991763	Kash5
ENSRNOG00000020130	287.961	0.0528148	0.252409	0.209243	0.834258	0.991763	Arhgef1
ENSRNOG00000019529	947.314	-0.133293	0.149004	-0.894557	0.371024	0.991763	Btbd1
ENSRNOG00000010803	549.5	-0.24538	0.200645	-1.22295	0.221347	0.991763	Gabra5
ENSRNOG00000068066	4.834	-0.765707	1.17424	-0.652087	0.514345	0.991763
ENSRNOG00000016374	769.542	0.127463	0.198405	0.642439	0.520588	0.991763	Fgfr2
ENSRNOG00000026114	99.2465	0.143403	0.37586	0.381534	0.702807	0.991763	Ap5b1
ENSRNOG00000026514	3.07594	-0.17073	1.69653	-0.100635	0.91984	0.991763	Wdr93
ENSRNOG00000020557	299.895	0.396272	0.221323	1.79047	0.073378	0.991763	Ryr1
ENSRNOG00000056946	1016.67	0.107267	0.155428	0.69014	0.490106	0.991763	Scaf1
ENSRNOG00000058030	34.7531	-0.492624	0.503956	-0.977513	0.328315	0.991763	Zfp748-ps1
ENSRNOG00000011313	174.766	0.164846	0.247968	0.664787	0.506187	0.991763	Sorcs1
ENSRNOG00000049179	17.9848	0.434756	0.654668	0.664087	0.506635	0.991763	Pidd1
ENSRNOG00000032246	7.47561	-0.925152	0.950882	-0.972941	0.330583	0.991763	Acsm3
ENSRNOG00000020660	2007.7	-0.159663	0.142041	-1.12407	0.260985	0.991763	Cfl1
ENSRNOG00000025075	35.1782	0.370476	0.467622	0.792255	0.428212	0.991763	Relt
ENSRNOG00000019426	116.096	-0.0669117	0.287684	-0.232587	0.816082	0.991763	Ramac
ENSRNOG00000068556	2.57226	-0.982655	2.01208	-0.488377	0.625283	0.991763	Cyp2a3
ENSRNOG00000013718	2567.67	-0.176581	0.121361	-1.45501	0.145667	0.991763	Herc2
ENSRNOG00000065597	9.82018	0.194992	0.994582	0.196054	0.844568	0.991763
ENSRNOG00000036703	1.32651	1.15359	2.69234	0.42847	0.668309	0.991763	Itgax
ENSRNOG00000052273	17.3612	-0.133601	0.685063	-0.19502	0.845377	0.991763	C1h15orf40
ENSRNOG00000013969	776.601	-0.174107	0.157108	-1.1082	0.267777	0.991763	Ahi1
ENSRNOG00000020817	0.133448	1.34798	4.07966	0.330416	0.741086	0.991763	Cyp2a1
ENSRNOG00000018462	72.6451	0.281543	0.328026	0.858294	0.39073	0.991763	Rabep2
ENSRNOG00000063481	0.133322	-0.569836	4.08047	-0.139649	0.888937	0.991763	LOC120099984
ENSRNOG00000016429	1656.82	-0.252489	0.138131	-1.82789	0.0675662	0.991763	Grm5
ENSRNOG00000012366	280.397	0.183877	0.224156	0.82031	0.412039	0.991763	Mesd
ENSRNOG00000019080	75.6613	-0.299055	0.414785	-0.720988	0.470917	0.991763	Hsd3b7
ENSRNOG00000013103	0.585958	2.86663	3.33395	0.85983	0.389883	0.991763	Ldhc
ENSRNOG00000019194	0.364958	0.402201	4.07904	0.0986019	0.921454	0.991763	Pitx3
ENSRNOG00000068986	1.58917	4.29167	2.50141	1.7157	0.0862167	0.991763	Erfl
ENSRNOG00000019278	0.681122	-1.15246	3.18928	-0.361356	0.717833	0.991763	Fsd2
ENSRNOG00000059492	66.1803	-0.247425	0.358761	-0.689666	0.490404	0.991763	Zfp160
ENSRNOG00000020489	83.7501	-0.339733	0.29319	-1.15875	0.24656	0.991763	Tmem145
ENSRNOG00000018993	520.943	0.0478668	0.177374	0.269865	0.787264	0.991763	Ilk
ENSRNOG00000018916	61.7641	-0.680347	0.392505	-1.73334	0.0830347	0.991763	Bcl7c
ENSRNOG00000066224	8.773	-0.190546	0.929793	-0.204934	0.837624	0.991763	LOC102548728
ENSRNOG00000069320	0.296912	0.38621	4.07966	0.0946672	0.924579	0.991763	Cyp2a2
ENSRNOG00000020380	3.38468	-4.00633	1.84968	-2.16596	0.0303144	0.991763	Lgals7
ENSRNOG00000014673	33.5278	-0.505048	0.440799	-1.14576	0.251895	0.991763	Eri2
ENSRNOG00000016206	382.542	0.230594	0.189744	1.21529	0.224257	0.991763	Uvrag
ENSRNOG00000016210	9.67486	0.677237	0.990972	0.683407	0.49435	0.991763	Mical2
ENSRNOG00000019145	723.13	0.029135	0.149807	0.194483	0.845798	0.991763	Kdm2a
ENSRNOG00000019674	230.452	-0.16081	0.237255	-0.677792	0.497903	0.991763	Mfsd13a
ENSRNOG00000020617	106.805	-0.0656136	0.268462	-0.244406	0.806917	0.991763	Mus81
ENSRNOG00000017021	464.717	0.173223	0.159668	1.08489	0.277969	0.991763	Galnt18
ENSRNOG00000066358	16.6718	-0.597292	0.721164	-0.828233	0.407539	0.991763
ENSRNOG00000011932	57.9241	-0.29791	0.363376	-0.819839	0.412308	0.991763	Snrpa1
ENSRNOG00000013436	129.122	0.367099	0.277264	1.32401	0.185501	0.991763	Pde7b
ENSRNOG00000032805	1.96658	-1.83069	2.05318	-0.891635	0.372589	0.991763	Cyp2f4
ENSRNOG00000065747	1.64777	-1.48464	2.28411	-0.649987	0.515701	0.991763
ENSRNOG00000013381	199.182	0.351128	0.287756	1.22023	0.222378	0.991763	Tsg101
ENSRNOG00000020479	269.582	-0.395715	0.202903	-1.95026	0.0511448	0.991763	Pik3c2a
ENSRNOG00000036859	126	0.305105	0.275905	1.10583	0.2688	0.991763	Gdpd5
ENSRNOG00000019883	80.0817	0.0893656	0.346085	0.258218	0.796238	0.991763	Pak4
ENSRNOG00000016683	41.1904	-0.0524789	0.471475	-0.111308	0.911372	0.991763	Zfp668
ENSRNOG00000051867	2.48363	0.582513	1.51841	0.383634	0.70125	0.991763	Zfp758
ENSRNOG00000045741	4.52902	-0.290871	1.15815	-0.251152	0.801697	0.991763
ENSRNOG00000057384	48.1115	0.491201	0.432578	1.13552	0.256158	0.991763	Nfatc2ip
ENSRNOG00000019685	3.93436	0.203488	1.27884	0.15912	0.873574	0.991763	Gdpd3
ENSRNOG00000011308	259.565	0.228767	0.23853	0.959071	0.337523	0.991763	Uhrf2
ENSRNOG00000030266	38.8761	0.825376	0.558574	1.47765	0.139502	0.991763	Plekhg2
ENSRNOG00000021140	140.281	-0.227714	0.241804	-0.94173	0.346331	0.991763	Kcnk4
ENSRNOG00000016573	490.601	0.347949	0.20968	1.65943	0.0970295	0.991763	Dgat2
ENSRNOG00000051578	30.2831	-0.993547	0.631827	-1.5725	0.115835	0.991763	Zfp54
ENSRNOG00000051578	30.2831	-0.993547	0.631827	-1.5725	0.115835	0.991763	LOC102552527
ENSRNOG00000025167	212.052	-0.111127	0.225622	-0.492536	0.62234	0.991763	Sema4b
ENSRNOG00000043056	0.133448	1.34798	4.07966	0.330416	0.741086	0.991763	Fpr2l3
ENSRNOG00000020495	420.384	0.258822	0.193606	1.33685	0.181272	0.991763	Eif3k
ENSRNOG00000060206	337.605	0.300558	0.198666	1.51288	0.130309	0.991763	Zfp592
ENSRNOG00000020596	153.057	0.157356	0.230675	0.682156	0.49514	0.991763	Dmac2
ENSRNOG00000015520	1.57188	1.50313	2.11791	0.709723	0.477876	0.991763	Ticrr
ENSRNOG00000056036	16.1972	0.284052	0.683569	0.415542	0.677745	0.991763	Zfp51
ENSRNOG00000055531	62.4426	-0.170951	0.352627	-0.484791	0.627825	0.991763	Hps5
ENSRNOG00000045838	91.6958	0.290298	0.306032	0.948587	0.342831	0.991763	Hps1
ENSRNOG00000020904	148.654	0.461746	0.267807	1.72418	0.0846758	0.991763	Cdc42ep2
ENSRNOG00000020271	294.33	-0.444692	0.181934	-2.44425	0.0145153	0.991763	Tial1
ENSRNOG00000055796	0.441747	2.44577	4.02396	0.607801	0.543319	0.991763	LOC100359972
ENSRNOG00000032668	31.0805	-0.529983	0.611397	-0.866839	0.38603	0.991763	Zfp80
ENSRNOG00000068024	9.0663	0.232473	0.90151	0.25787	0.796507	0.991763	B3gnt8
ENSRNOG00000028113	64.0395	-0.413181	0.343206	-1.20389	0.228633	0.991763	Whamm
ENSRNOG00000047124	7.40649	-0.456059	0.998107	-0.456924	0.647726	0.991763	Atp2a1
ENSRNOG00000012067	0.384337	0.402201	4.07904	0.0986019	0.921454	0.991763	Fam111a
ENSRNOG00000026115	148.023	0.190114	0.23773	0.799706	0.423881	0.991763	Zfp646
ENSRNOG00000042347	16.9093	-0.102933	0.695573	-0.147983	0.882356	0.991763	Zfp53
ENSRNOG00000026857	19.9052	0.23487	0.610574	0.384672	0.700481	0.991763	Kif7
ENSRNOG00000020607	124.873	0.514023	0.271683	1.892	0.0584914	0.991763	Bckdha
ENSRNOG00000013057	17.2939	1.20213	0.631824	1.90264	0.057088	0.991763	Prc1
ENSRNOG00000070288	0.326927	-1.62121	4.02491	-0.402793	0.6871	0.991763	LOC120099868
ENSRNOG00000013194	596.051	0.146809	0.170102	0.863064	0.388102	0.991763	Rps6ka2
ENSRNOG00000020906	16.1777	-1.09072	0.678657	-1.60717	0.108016	0.991763	Pola2
ENSRNOG00000036571	0.266897	1.91492	4.06073	0.47157	0.637234	0.991763	Ces2c
ENSRNOG00000012360	128.486	-0.564472	0.308876	-1.8275	0.0676239	0.991763	Gtf2h1
ENSRNOG00000058133	4.21264	-0.433584	1.33928	-0.323745	0.746131	0.991763	Ppm1n
ENSRNOG00000023496	746.801	-0.0301332	0.153632	-0.196138	0.844502	0.991763	Entrep2
ENSRNOG00000019178	110.985	-0.05251	0.313749	-0.167363	0.867084	0.991763	Taf10
ENSRNOG00000014373	66.7438	-0.484804	0.341923	-1.41787	0.156228	0.991763	Trim66
ENSRNOG00000014187	576.798	0.301067	0.175406	1.7164	0.086088	0.991763	Igf1r
ENSRNOG00000016498	38.2063	-0.76927	0.453896	-1.69482	0.0901104	0.991763
ENSRNOG00000061795	74.744	0.45154	0.359636	1.25555	0.209281	0.991763	Rbm4b
ENSRNOG00000019212	443.683	0.312872	0.170905	1.83068	0.0671484	0.991763	Tpp1
ENSRNOG00000070202	3.65674	-0.558308	1.5872	-0.351756	0.725021	0.991763	Pgpep1l
ENSRNOG00000069377	0.883493	3.452	3.39292	1.01741	0.308957	0.991763
ENSRNOG00000020635	106.818	0.402614	0.2983	1.34969	0.177114	0.991763	Exosc5
ENSRNOG00000017120	683.094	-0.0290055	0.191685	-0.151318	0.879725	0.991763	Abhd2
ENSRNOG00000020369	100.155	1.00688	0.830464	1.21244	0.225346	0.991763	Igf2
ENSRNOG00000020276	1.22126	-3.5516	2.70736	-1.31183	0.189577	0.991763	Tnni2
ENSRNOG00000069701	17.7152	-0.616657	0.601032	-1.026	0.304893	0.991763
ENSRNOG00000042059	14.9061	0.335717	0.684516	0.490445	0.623819	0.991763	Rccd1
ENSRNOG00000012683	238.178	-0.321187	0.220363	-1.45754	0.144968	0.991763	Abhd17c
ENSRNOG00000068180	14.8092	0.948864	0.698368	1.35869	0.174246	0.991763	Tmem91
ENSRNOG00000022822	10.7375	-0.671622	0.804618	-0.834709	0.403882	0.991763	Fam169b
ENSRNOG00000026891	0.163464	-0.569836	4.08047	-0.139649	0.888937	0.991763
ENSRNOG00000014565	199.74	0.0519695	0.237487	0.218831	0.826782	0.991763	Lcmt1
ENSRNOG00000022669	3.26524	0.992852	1.57837	0.629035	0.529326	0.991763	Cd177
ENSRNOG00000051815	10.1589	-0.237413	0.791784	-0.299846	0.764294	0.991763
ENSRNOG00000019193	1843.74	-0.153298	0.132041	-1.16099	0.245646	0.991763	Stx1b
ENSRNOG00000024363	30.891	0.376339	0.498466	0.754995	0.450252	0.991763	Sertad1
ENSRNOG00000060707	529.181	0.136327	0.190197	0.716767	0.473518	0.991763	Atg2a
ENSRNOG00000012357	474.286	-0.0427546	0.20003	-0.213742	0.830749	0.991763	Unc45a
ENSRNOG00000024000	11.0834	0.466704	0.925119	0.504481	0.613924	0.991763	Cd22
ENSRNOG00000011659	17.5097	-0.27084	0.630368	-0.429653	0.667448	0.991763	Alpk3
ENSRNOG00000018928	32.9029	-0.182642	0.557547	-0.327582	0.743228	0.991763	LOC102553760
ENSRNOG00000011599	259.574	0.202508	0.225853	0.896636	0.369913	0.991763	Gldc
ENSRNOG00000069477	1.00031	1.04763	2.77111	0.378056	0.705389	0.991763
ENSRNOG00000019879	0.220873	1.36397	4.07904	0.334385	0.738089	0.991763	Sycn
ENSRNOG00000049295	0.784429	-0.265885	2.80926	-0.0946457	0.924596	0.991763
ENSRNOG00000050282	1306.9	-0.0831296	0.131519	-0.632074	0.527339	0.991763	Srcap
ENSRNOG00000054506	5.87928	1.01254	1.17509	0.861672	0.388868	0.991763	Nccrp1
ENSRNOG00000043007	236.278	0.139437	0.217787	0.640246	0.522013	0.991763	Rcn3
ENSRNOG00000012442	189.192	-0.0654674	0.228241	-0.286834	0.774239	0.991763	Cemip
ENSRNOG00000014513	6.34514	0.86633	1.12578	0.76954	0.441573	0.991763	Rexo5
ENSRNOG00000021106	475.954	0.156357	0.159332	0.981328	0.326431	0.991763	Gramd1a
ENSRNOG00000015540	471.097	-0.0758929	0.183217	-0.414225	0.67871	0.991763	Ppp6r3
ENSRNOG00000021108	9.88356	-0.236387	0.822891	-0.287264	0.77391	0.991763	Slc22a12
ENSRNOG00000050104	3341.89	0.0250329	0.133508	0.187501	0.851268	0.991763	Clip3
ENSRNOG00000018390	2351.24	0.134216	0.139556	0.961733	0.336184	0.991763	Pld3
ENSRNOG00000021484	35.3101	-0.128644	0.516111	-0.249255	0.803163	0.991763
ENSRNOG00000018683	261.231	-0.0252408	0.237428	-0.106309	0.915337	0.991763	Dock1
ENSRNOG00000017716	2.69679	-2.30776	1.73065	-1.33346	0.182381	0.991763	Ucp3
ENSRNOG00000020583	72.9036	0.234231	0.333537	0.702263	0.482515	0.991763	Fcgrt
ENSRNOG00000050828	68.1169	0.498186	0.343133	1.45187	0.146537	0.991763	Vkorc1
ENSRNOG00000018385	972.067	0.0328795	0.161833	0.203169	0.839003	0.991763	Chrm1
ENSRNOG00000025216	147.076	0.41519	0.318373	1.3041	0.1922	0.991763	Alkbh6
ENSRNOG00000020953	0.231637	1.36397	4.07904	0.334385	0.738089	0.991763	Ms4a7
ENSRNOG00000018083	2.10804	-0.293609	1.76438	-0.16641	0.867835	0.991763
ENSRNOG00000019301	0.441747	2.44577	4.02396	0.607801	0.543319	0.991763	Lipm
ENSRNOG00000026408	78.0619	0.656691	0.400928	1.63793	0.101437	0.991763	Rnf169
ENSRNOG00000015518	29.2276	0.0969242	0.49545	0.195629	0.844901	0.991763	Rbp4
ENSRNOG00000069809	0.231637	1.36397	4.07904	0.334385	0.738089	0.991763
ENSRNOG00000017762	9.00651	-0.584958	0.943747	-0.619825	0.535373	0.991763	Cdhr5
ENSRNOG00000065783	0.365085	2.19387	4.04579	0.542259	0.58764	0.991763
ENSRNOG00000023274	109.649	-0.158051	0.297534	-0.531204	0.595278	0.991763	Lrrc28
ENSRNOG00000021207	0.399965	-1.94518	4.00144	-0.486121	0.626882	0.991763	Lgals12
ENSRNOG00000050024	4.1377	-0.198116	1.52463	-0.129944	0.896611	0.991763	Ms4a4a
ENSRNOG00000019666	245.485	0.152261	0.198103	0.768596	0.442133	0.991763	Ubxn1
ENSRNOG00000049277	8.59052	0.628505	0.935246	0.672021	0.50157	0.991763	Syne4
ENSRNOG00000020527	305.311	0.1614	0.231749	0.696442	0.486152	0.991763	Drap1
ENSRNOG00000018207	36.965	-0.207846	0.506109	-0.410674	0.681312	0.991763	Dynlt1
ENSRNOG00000033881	43.9986	-0.505882	0.400287	-1.2638	0.206303	0.991763	Insyn2a
ENSRNOG00000016358	1385.56	-0.0606065	0.134674	-0.450023	0.652694	0.991763	Apba2
ENSRNOG00000019725	1383.99	0.0418436	0.144502	0.289571	0.772145	0.991763	Actr1a
ENSRNOG00000045568	328.514	0.165576	0.223282	0.741556	0.458356	0.991763	Rbm14
ENSRNOG00000016728	293.607	0.0979841	0.199172	0.491956	0.62275	0.991763	Tiam2
ENSRNOG00000036649	248.546	0.0627415	0.22819	0.274953	0.783353	0.991763	Pwwp2b
ENSRNOG00000045561	80.0518	0.316467	0.350767	0.902217	0.366942	0.991763	Uqcc3
ENSRNOG00000020595	587.152	-0.0541413	0.180637	-0.299725	0.764387	0.991763	Rps11
ENSRNOG00000018674	818.128	0.0522174	0.152016	0.343499	0.731223	0.991763	Ntrk3
ENSRNOG00000020389	22.4286	0.304886	0.576609	0.528756	0.596974	0.991763	Capn12
ENSRNOG00000055506	8.60565	-1.85485	0.996627	-1.86113	0.0627264	0.991763
ENSRNOG00000018322	710.893	-0.173994	0.197048	-0.883001	0.377236	0.991763	Picalm
ENSRNOG00000019851	0.66262	3.03631	3.79281	0.800543	0.423396	0.991763	Cox6a2
ENSRNOG00000019920	55.5139	0.111364	0.360755	0.308696	0.757552	0.991763	Doc2a
ENSRNOG00000020839	222.666	0.226905	0.279057	0.813113	0.416154	0.991763	Lrfn3
ENSRNOG00000064232	33.1053	0.575274	0.457501	1.25743	0.208599	0.991763	LOC103691238
ENSRNOG00000050180	127.249	0.427269	0.258339	1.65391	0.0981464	0.991763	Zfpl1
ENSRNOG00000019675	12.8309	1.78496	0.869769	2.05223	0.0401478	0.991763	Pycard
ENSRNOG00000020551	443.194	0.293854	0.224995	1.30605	0.191537	0.991763	Bles03
ENSRNOG00000047756	817.258	-0.0958951	0.167701	-0.571822	0.567443	0.991763	Mef2a
ENSRNOG00000020245	0.463273	2.50636	4.01923	0.62359	0.532897	0.991763	Syt8
ENSRNOG00000066875	35.7328	0.155237	0.454473	0.341576	0.73267	0.991763	Dcun1d3
ENSRNOG00000018962	5.84658	0.161739	1.06943	0.151239	0.879787	0.991763	Ctf1
ENSRNOG00000014486	437.251	-0.138358	0.170968	-0.809265	0.418363	0.991763	Rfx3
ENSRNOG00000024793	53.4528	-0.192069	0.357571	-0.537149	0.591165	0.991763	Kctd21
ENSRNOG00000056223	43.492	-0.479762	0.467824	-1.02552	0.305119	0.991763	Tfb1m
ENSRNOG00000012292	17.5791	-0.272867	0.623788	-0.437435	0.661796	0.991763	Alg8
ENSRNOG00000046635	2.58221	0.596877	1.743	0.342442	0.732018	0.991763	Cdca5
ENSRNOG00000020618	194.517	0.225709	0.236662	0.953716	0.340227	0.991763	Rpl13a
ENSRNOG00000020618	194.517	0.225709	0.236662	0.953716	0.340227	0.991763	Flt3lg
ENSRNOG00000012698	194.306	-0.057712	0.233938	-0.246698	0.805142	0.991763	Chsy1
ENSRNOG00000050741	9.11242	0.138883	0.886391	0.156683	0.875494	0.991763
ENSRNOG00000019935	195.651	-0.0522506	0.22471	-0.232525	0.816131	0.991763	Armc5
ENSRNOG00000012383	181.401	0.192816	0.262162	0.735485	0.462044	0.991763	Ndufc2
ENSRNOG00000026296	0.830549	-1.53802	2.75398	-0.558471	0.576523	0.991763	Saxo2
ENSRNOG00000019960	85.562	0.168412	0.314178	0.536039	0.591931	0.991763	Ino80e
ENSRNOG00000012404	87.5131	0.369194	0.333118	1.1083	0.267733	0.991763	Thrsp
ENSRNOG00000017487	0.7902	0.487995	3.28349	0.148621	0.881853	0.991763	Otoa
ENSRNOG00000016926	0.133448	1.34798	4.07966	0.330416	0.741086	0.991763	Plekhs1
ENSRNOG00000064709	1.87277	-1.18792	2.03839	-0.582772	0.560047	0.991763
ENSRNOG00000046333	724.782	0.0383754	0.1556	0.246628	0.805196	0.991763	Ablim1
ENSRNOG00000019461	35.7297	-0.192687	0.464931	-0.414442	0.67855	0.991763	Zbtb3
ENSRNOG00000063251	0.41599	-1.99646	3.99818	-0.499342	0.617538	0.991763
ENSRNOG00000012494	5.04968	1.22964	1.19722	1.02708	0.304382	0.991763	Kctd14
ENSRNOG00000050624	156.329	-0.102009	0.240868	-0.423504	0.671927	0.991763	Lysmd4
ENSRNOG00000016751	212.23	-0.0782963	0.233034	-0.335987	0.736881	0.991763	Slc25a28
ENSRNOG00000067190	1.09236	1.31127	2.65693	0.49353	0.621638	0.991763
ENSRNOG00000021050	0.463273	2.50636	4.01923	0.62359	0.532897	0.991763	Or10v1
ENSRNOG00000019077	187.303	-0.326721	0.216941	-1.50604	0.132058	0.991763	Lipa
ENSRNOG00000021029	1.06297	3.74167	2.85102	1.31239	0.189387	0.991763	Hamp
ENSRNOG00000030907	2.85494	-1.02831	1.59121	-0.646246	0.51812	0.991763	Ctf2
ENSRNOG00000014862	18.6431	-0.905187	0.671666	-1.34768	0.177763	0.991763	Gabrg3
ENSRNOG00000013017	198.53	-0.0776836	0.251706	-0.308628	0.757604	0.991763	Arnt2
ENSRNOG00000036604	41.0098	-0.214946	0.476268	-0.451314	0.651763	0.991763	Ifit2
ENSRNOG00000019439	126.251	-0.134535	0.28892	-0.465648	0.641467	0.991763	Polr2g
ENSRNOG00000019358	4.56848	-0.325886	1.1463	-0.284295	0.776185	0.991763	Esr1
ENSRNOG00000017195	549.545	0.160065	0.186099	0.860106	0.389731	0.991763	Ctr9
ENSRNOG00000016603	472.425	0.349686	0.186822	1.87176	0.0612403	0.991763	Rtn2
ENSRNOG00000065273	126.377	-0.158905	0.281298	-0.564898	0.572143	0.991763	LOC103691165
ENSRNOG00000018987	253.291	-0.0975716	0.21395	-0.456048	0.648355	0.991763	Crebzf
ENSRNOG00000027374	35.3516	0.608425	0.433526	1.40343	0.160488	0.991763	Cfap46
ENSRNOG00000022748	15.6707	0.194766	0.720683	0.270252	0.786967	0.991763	Tmem126a
ENSRNOG00000016689	17.3474	-0.202776	0.605112	-0.335105	0.737546	0.991763	Fanci
ENSRNOG00000018929	5.41996	0.361638	1.12229	0.322231	0.747278	0.991763	Kif20b
ENSRNOG00000020623	89.6317	-0.0508455	0.339542	-0.149747	0.880964	0.991763	Aldh16a1
ENSRNOG00000018487	888.796	0.211722	0.173604	1.21957	0.222629	0.991763	Slc3a2
ENSRNOG00000019701	39.2813	0.155956	0.49425	0.315541	0.752351	0.991763	C1h11orf98
ENSRNOG00000022386	649.081	0.0255506	0.212098	0.120466	0.904114	0.991763	Opalin
ENSRNOG00000033733	29.2018	0.467644	0.533114	0.877193	0.380382	0.991763	Ccdc81
ENSRNOG00000026005	209.966	0.0545827	0.226849	0.240613	0.809855	0.991763	Ints5
ENSRNOG00000060269	0.69491	3.09785	3.72359	0.831952	0.405436	0.991763	Vwce
ENSRNOG00000032293	230.459	-0.0826816	0.207307	-0.398837	0.690014	0.991763	Polg
ENSRNOG00000020354	81.6242	0.269523	0.33358	0.807972	0.419107	0.991763	Mrpl23
ENSRNOG00000064201	0.133322	-0.569836	4.08047	-0.139649	0.888937	0.991763
ENSRNOG00000024530	47.5254	-0.661736	0.453187	-1.46018	0.14424	0.991763	Lyrm1
ENSRNOG00000020637	0.138663	-0.569836	4.08047	-0.139649	0.888937	0.991763	Hmx3
ENSRNOG00000015003	19.0276	0.46711	0.575373	0.811838	0.416885	0.991763	Pex11a
ENSRNOG00000018725	166.065	0.321421	0.249553	1.28798	0.197752	0.991763	Phkg2
ENSRNOG00000030981	5.30258	0.943298	1.28355	0.734912	0.462393	0.991763	Scnn1b
ENSRNOG00000055401	510.634	0.0616663	0.166888	0.369506	0.71175	0.991763	Kcnc1
ENSRNOG00000054955	283.994	-0.440361	0.204797	-2.15023	0.0315373	0.991763	Adgra1
ENSRNOG00000017118	8.11429	1.40022	1.14142	1.22674	0.219922	0.991763	P4ha3
ENSRNOG00000070964	36.8349	0.236166	0.498279	0.473963	0.635526	0.991763	Cc2d2b
ENSRNOG00000033744	7.06162	0.210903	1.03389	0.203989	0.838362	0.991763	Rasgrp4
ENSRNOG00000011637	0.533794	2.7861	3.99973	0.696573	0.48607	0.991763
ENSRNOG00000050426	36.8743	1.52704	0.534378	2.8576	0.00426857	0.991763	Dnah3
ENSRNOG00000019724	1353.05	0.126768	0.143679	0.882297	0.377616	0.991763	Ganab
ENSRNOG00000016496	25.7185	-0.500892	0.52869	-0.947421	0.343424	0.991763	Ctsc
ENSRNOG00000048733	212.088	0.0695675	0.243687	0.285479	0.775277	0.991763	Nup62
ENSRNOG00000022839	16.0953	-1.90149	0.873082	-2.17791	0.0294131	0.991763	Ifit3
ENSRNOG00000014923	0.49828	-0.39424	3.92086	-0.100549	0.919908	0.991763	Ifitm5
ENSRNOG00000020148	4.03275	0.722423	1.37618	0.524947	0.59962	0.991763	Il4i1
ENSRNOG00000067262	222.919	0.0276488	0.20117	0.13744	0.890683	0.991763	Aldh18a1
ENSRNOG00000025052	20.4492	-0.284015	0.594938	-0.477386	0.633087	0.991763	Stard5
ENSRNOG00000033901	1.71185	4.40213	2.26495	1.94359	0.0519453	0.991763	Ttll2
ENSRNOG00000018815	7.37957	0.859062	0.915403	0.938452	0.348012	0.991763	Plk1
ENSRNOG00000020726	130.122	0.193888	0.26339	0.736126	0.461654	0.991763	Sipa1
ENSRNOG00000053015	20.1435	-0.542714	0.587499	-0.92377	0.355606	0.991763	Cfap119
ENSRNOG00000020650	8730.38	0.108268	0.179632	0.602722	0.546694	0.991763	Slc17a7
ENSRNOG00000047027	2.32168	3.79966	1.93768	1.96093	0.0498871	0.991763	Unc93a
ENSRNOG00000065380	16.0716	-0.116575	0.651691	-0.17888	0.858032	0.991763
ENSRNOG00000019245	90.8712	-0.129236	0.354681	-0.364372	0.71558	0.991763	Sgf29
ENSRNOG00000011680	310.625	0.0333438	0.223571	0.149142	0.881442	0.991763	Il16
ENSRNOG00000036603	22.6208	-0.828575	0.599298	-1.38258	0.166795	0.991763	Ifit1bl
ENSRNOG00000020060	0.830325	-0.884644	2.94655	-0.30023	0.764001	0.991763	Atf5
ENSRNOG00000020430	386.464	-0.0277605	0.182233	-0.152335	0.878922	0.991763	Wdr11
ENSRNOG00000019687	0.400092	-0.409008	4.04662	-0.101074	0.919492	0.991763	Art2b
ENSRNOG00000017619	175.628	-0.247187	0.263622	-0.937657	0.348421	0.991763	Aldh1a1
ENSRNOG00000017850	28.2518	1.41974	0.539515	2.63152	0.00850049	0.991763	Dctpp1
ENSRNOG00000047401	2.16556	-0.816487	1.91398	-0.426592	0.669677	0.991763	Gfy
ENSRNOG00000064037	6.69812	0.793918	0.950948	0.83487	0.403791	0.991763	Hpse2
ENSRNOG00000015078	26.9088	0.42546	0.613092	0.693958	0.487709	0.991763	Ifitm3
ENSRNOG00000020505	8.5221	0.716903	0.889377	0.806073	0.420201	0.991763	Map4k1
ENSRNOG00000014936	21.0791	0.757797	0.663137	1.14275	0.253144	0.991763	Ifitm2
ENSRNOG00000018052	113.89	0.472859	0.264258	1.78938	0.073553	0.991763	Cnksr3
ENSRNOG00000019050	3.46378	-1.76449	1.41071	-1.25077	0.211017	0.991763	Ifit1
ENSRNOG00000019342	5.07531	2.9547	1.35118	2.18675	0.0287607	0.991763	Sult1a1
ENSRNOG00000022321	5.77988	1.40158	1.1273	1.2433	0.213756	0.991763	Hapln3
ENSRNOG00000020191	233.85	-0.0587062	0.201256	-0.291699	0.770517	0.991763	Tbc1d17
ENSRNOG00000036645	2.05194	-2.21186	1.87095	-1.18222	0.23712	0.991763	Ifitm6
ENSRNOG00000018042	186.802	-0.1544	0.258358	-0.59762	0.550094	0.991763	Mrpl48
ENSRNOG00000064039	0.41599	-1.99646	3.99818	-0.499342	0.617538	0.991763
ENSRNOG00000020903	49.2708	0.076457	0.411222	0.185926	0.852503	0.991763	Lto1
ENSRNOG00000018840	261.81	0.217333	0.206439	1.05277	0.292446	0.991763	Rnf40
ENSRNOG00000004144	2.22977	-1.26339	1.71349	-0.737318	0.460929	0.991763
ENSRNOG00000018391	104.125	-0.106263	0.344032	-0.308875	0.757417	0.991763	Cdk2ap2
ENSRNOG00000020289	245.406	0.0598639	0.25798	0.232049	0.8165	0.991763	Akt1s1
ENSRNOG00000017227	784.907	0.0698677	0.170393	0.410038	0.681778	0.991763	Ppme1
ENSRNOG00000020851	9501.65	0.267047	0.138661	1.9259	0.0541172	0.991763	Aplp1
ENSRNOG00000011068	60.1113	-0.106091	0.371276	-0.285748	0.775071	0.991763	Papss2
ENSRNOG00000043141	168.317	-0.0383673	0.242229	-0.158393	0.874147	0.991763	Ap3s2
ENSRNOG00000015088	329.716	-0.374034	0.194779	-1.9203	0.0548205	0.991763	Prune2
ENSRNOG00000017114	731.006	-0.269959	0.156082	-1.72959	0.0837027	0.991763	Synj2
ENSRNOG00000060008	205.783	0.223715	0.235492	0.949987	0.342119	0.991763	Cog7
ENSRNOG00000018176	1427.92	-0.372887	0.187739	-1.9862	0.0470113	0.991763	Rab6a
ENSRNOG00000021724	4.55418	1.72381	1.38508	1.24455	0.213296	0.991763	Ptprcap
ENSRNOG00000060693	14.6444	-0.423488	0.838948	-0.504784	0.61371	0.991763	Catsperg
ENSRNOG00000051256	62.6394	0.410057	0.38188	1.07379	0.282918	0.991763	R3hcc1l
ENSRNOG00000027228	4.04386	-0.484107	1.2581	-0.384791	0.700392	0.991763	Mogat2
ENSRNOG00000029061	109.306	-0.091582	0.300933	-0.304327	0.760879	0.991763	Hirip3
ENSRNOG00000018838	148.624	0.188976	0.266205	0.709889	0.477773	0.991763	Paox
ENSRNOG00000017222	83.2764	-0.223995	0.293167	-0.764051	0.444837	0.991763	Abraxas2
ENSRNOG00000065211	0.503748	1.23212	3.59078	0.343134	0.731498	0.991763
ENSRNOG00000020918	143.149	0.191691	0.311673	0.61504	0.538528	0.991763	Ccnd1
ENSRNOG00000017889	157.423	0.172013	0.23107	0.744417	0.456624	0.991763	Serac1
ENSRNOG00000014589	60.3306	-0.374136	0.336168	-1.11294	0.265733	0.991763	Arpin
ENSRNOG00000017608	204.805	0.186818	0.233322	0.800688	0.423312	0.991763	C2cd3
ENSRNOG00000020864	21.7343	1.77435	0.604377	2.93584	0.00332647	0.991763	Kirrel2
ENSRNOG00000017927	0.441747	2.44577	4.02396	0.607801	0.543319	0.991763	Drd4
ENSRNOG00000023360	328.344	-0.0443562	0.181684	-0.244139	0.807123	0.991763	Fus
ENSRNOG00000068667	12.1444	-1.36485	0.833275	-1.63793	0.101436	0.991763
ENSRNOG00000019873	798.704	-0.0897407	0.175078	-0.512575	0.608249	0.991763	B3gat3
ENSRNOG00000019873	798.704	-0.0897407	0.175078	-0.512575	0.608249	0.991763	Eml3
ENSRNOG00000030888	257.41	0.0576995	0.227718	0.253382	0.799973	0.991763	Rela
ENSRNOG00000011683	15.1199	0.87244	0.679039	1.28482	0.198856	0.991763	Fes
ENSRNOG00000018599	225.966	0.530104	0.228713	2.31777	0.0204616	0.991763	Gga2
ENSRNOG00000021689	130.261	0.0580657	0.255086	0.227632	0.819933	0.991763	Rps6kb2
ENSRNOG00000024036	86.166	0.0916943	0.323305	0.283615	0.776705	0.991763	Fam98c
ENSRNOG00000015727	15.167	1.95869	0.714667	2.74071	0.00613069	0.991763	Loxl4
ENSRNOG00000024625	47.8055	0.193307	0.498391	0.387861	0.698119	0.991763	Proser3
ENSRNOG00000011352	324.583	-0.111996	0.186927	-0.599144	0.549077	0.991763	Furin
ENSRNOG00000017725	29.9413	0.282366	0.478322	0.590325	0.554973	0.991763	Pnlip
ENSRNOG00000020484	0.533413	-0.990328	3.79911	-0.260673	0.794344	0.991763	Trpm5
ENSRNOG00000020742	806.678	0.137673	0.189564	0.72626	0.467679	0.991763	Pcnx3
ENSRNOG00000018877	247.755	0.0243709	0.22435	0.108629	0.913497	0.991763	Zfp629
ENSRNOG00000020922	150.485	-0.179189	0.267394	-0.670129	0.502775	0.991763	Hspb6
ENSRNOG00000011213	18.6788	0.134487	0.622312	0.216108	0.828903	0.991763	Blm
ENSRNOG00000020929	73.9933	-0.097448	0.339942	-0.286661	0.774372	0.991763	Lin37
ENSRNOG00000018627	1298.36	0.416731	0.228895	1.82062	0.0686644	0.991763	Plekhb1
ENSRNOG00000030180	615.284	-0.187585	0.231432	-0.810542	0.417629	0.991763	Lrrc10b
ENSRNOG00000019858	34.2583	0.202683	0.435458	0.465448	0.641611	0.991763	Rom1
ENSRNOG00000019813	174.595	0.43499	0.245882	1.7691	0.0768769	0.991763	Ppp4c
ENSRNOG00000019913	308.539	-0.0873852	0.20497	-0.426331	0.669866	0.991763	Mta2
ENSRNOG00000067655	13.7521	-0.615849	0.74792	-0.823416	0.410271	0.991763	LOC103691235
ENSRNOG00000019005	101.802	-0.221625	0.282346	-0.784942	0.432488	0.991763	Pde8a
ENSRNOG00000016593	0.400218	0.95314	4.06073	0.234721	0.814425	0.991763	Pde6c
ENSRNOG00000014471	2.90487	-0.441828	1.51237	-0.292143	0.770177	0.991763	B3gnt6
ENSRNOG00000022521	2.07613	-4.31521	2.09737	-2.05744	0.0396435	0.991763	Ddias
ENSRNOG00000052802	72.6391	-0.108744	0.326975	-0.332576	0.739454	0.991763	Aldoa
ENSRNOG00000012196	48.0362	0.186672	0.377475	0.49453	0.620932	0.991763	Asah2
ENSRNOG00000010630	164.71	0.342221	0.253148	1.35186	0.176419	0.991763	Prcp
ENSRNOG00000014078	843.036	0.0210665	0.180963	0.116413	0.907325	0.991763	Ndufb8
ENSRNOG00000036866	55.6261	0.561251	0.425863	1.31791	0.187532	0.991763	Acer3
ENSRNOG00000014183	702.881	-0.333349	0.157818	-2.11224	0.0346659	0.991763	Gnaq
ENSRNOG00000065313	2.56602	-1.54685	1.66655	-0.928176	0.353317	0.991763
ENSRNOG00000014482	271.27	0.184667	0.223119	0.827665	0.40786	0.991763	Slf2
ENSRNOG00000012061	1760.59	-0.413531	0.163995	-2.52161	0.011682	0.991763	Prkcb
ENSRNOG00000020076	159.474	-0.212926	0.29722	-0.716392	0.473749	0.991763	Borcs7
ENSRNOG00000030689	0.673383	3.05259	3.43971	0.887457	0.374833	0.991763	Ms4a6c
ENSRNOG00000014833	39.6917	0.207136	0.423694	0.48888	0.624926	0.991763	Smndc1
ENSRNOG00000016770	5067.92	0.130232	0.127209	1.02377	0.305945	0.991763	Calm3
ENSRNOG00000019914	195.472	0.0653858	0.236835	0.276082	0.782485	0.991763	Tlcd3b
ENSRNOG00000028746	291.316	0.0321521	0.224116	0.143462	0.885925	0.991763	Gsto1
ENSRNOG00000048028	8.34746	-1.27672	0.998312	-1.27888	0.200941	0.991763
ENSRNOG00000069697	36.6445	-0.211857	0.514337	-0.411903	0.68041	0.991763	Gsto2
ENSRNOG00000069311	2.40513	0.380643	1.56844	0.242689	0.808246	0.991763
ENSRNOG00000046915	0.354322	2.15853	4.04916	0.53308	0.593978	0.991763	Ceacam9
ENSRNOG00000014276	93.1829	0.397658	0.330944	1.20159	0.229524	0.991763	Plce1
ENSRNOG00000031328	125.897	-0.335761	0.273819	-1.22622	0.220117	0.991763	Zfp110
ENSRNOG00000016701	29.0333	0.822006	0.50695	1.62147	0.104916	0.991763	Gng8
ENSRNOG00000027944	272.892	0.130442	0.196156	0.664992	0.506056	0.991763	Pnma8a
ENSRNOG00000042679	306.49	0.0198393	0.187488	0.105816	0.915728	0.991763	Lcor
ENSRNOG00000027919	61.7788	0.258022	0.348119	0.741189	0.458579	0.991763	Rdh13
ENSRNOG00000068425	54.6579	0.351821	0.382941	0.918735	0.358234	0.991763	Zfp551
ENSRNOG00000026432	1481.42	0.0498522	0.17681	0.281953	0.77798	0.991763	Syt7
ENSRNOG00000011262	278.855	0.0464502	0.193509	0.240041	0.810298	0.991763	Bicra
ENSRNOG00000026065	2213.62	0.244902	0.163532	1.49758	0.134243	0.991763	Slit1
ENSRNOG00000028617	0.399965	-1.94518	4.00144	-0.486121	0.626882	0.991763	LOC108349752
ENSRNOG00000043503	604.756	0.104185	0.188309	0.553265	0.580082	0.991763	Ehd1
ENSRNOG00000062534	0.62618	-0.996451	3.28221	-0.303592	0.761439	0.991763	LOC100364427
ENSRNOG00000019464	2.60292	0.431098	1.50537	0.286373	0.774592	0.991763	Ttc9c
ENSRNOG00000021916	8.12063	-0.371942	0.883922	-0.420786	0.673912	0.991763	Slc16a12
ENSRNOG00000015304	167.761	0.343142	0.228363	1.50261	0.132939	0.991763	Tmem160
ENSRNOG00000062406	396.795	-0.0640087	0.190006	-0.336878	0.736209	0.991763	Mosmo
ENSRNOG00000015376	115.276	-0.257755	0.321331	-0.802149	0.422467	0.991763	Npas1
ENSRNOG00000020773	159.151	0.505283	0.250877	2.01406	0.0440027	0.991763	Map3k11
ENSRNOG00000020039	11.4735	-0.57694	0.813777	-0.708966	0.478346	0.991763	Slc5a2
ENSRNOG00000016907	735.776	-0.0629928	0.148167	-0.425148	0.670729	0.991763	Ppp5c
ENSRNOG00000025799	0.133448	1.34798	4.07966	0.330416	0.741086	0.991763	Smokzl
ENSRNOG00000053347	80.7176	0.0470868	0.29852	0.157734	0.874666	0.991763	Ccdc28a
ENSRNOG00000025110	118.235	0.347945	0.265563	1.31022	0.190122	0.991763	Vwa3a
ENSRNOG00000021390	60.9484	0.23959	0.350193	0.684167	0.49387	0.991763	Meis3
ENSRNOG00000020144	93.9517	-0.0594357	0.319176	-0.186216	0.852276	0.991763	Rusf1
ENSRNOG00000062548	17.0058	0.271994	0.629693	0.431946	0.665781	0.991763
ENSRNOG00000014531	407.681	-0.0797194	0.169161	-0.471264	0.637452	0.991763	Hbs1l
ENSRNOG00000014256	1.46001	2.05489	2.23692	0.918625	0.358292	0.991763	Foxa3
ENSRNOG00000020165	2.49903	1.12304	1.70613	0.658241	0.510383	0.991763	Ahsp
ENSRNOG00000028832	254.832	-0.540585	0.20169	-2.68027	0.00735621	0.991763	Sorcs3
ENSRNOG00000020434	7.51912	-0.204616	0.942236	-0.21716	0.828084	0.991763	Ascl2
ENSRNOG00000030788	0.463273	2.50636	4.01923	0.62359	0.532897	0.991763	Olr35
ENSRNOG00000014353	538.388	-0.079728	0.163713	-0.486997	0.62626	0.991763	Sympk
ENSRNOG00000009482	58.3234	0.179479	0.35281	0.508714	0.610953	0.991763	Emx2
ENSRNOG00000068806	0.933759	0.469716	3.03168	0.154936	0.876872	0.991763	Sdr42e2
ENSRNOG00000037415	81.3504	-0.484223	0.311051	-1.55674	0.119533	0.991763
ENSRNOG00000036760	23.0087	0.243828	0.556858	0.437865	0.661484	0.991763	Tmc5
ENSRNOG00000014768	139.441	0.217643	0.250429	0.869078	0.384804	0.991763	Glis3
ENSRNOG00000027936	28.4762	0.0947348	0.489731	0.193442	0.846613	0.991763	Ccdc8
ENSRNOG00000058050	830.216	-0.0932352	0.15314	-0.608824	0.542641	0.991763	Bclaf1
ENSRNOG00000058050	830.216	-0.0932352	0.15314	-0.608824	0.542641	0.991763	Mtfr2
ENSRNOG00000021021	0.220873	1.36397	4.07904	0.334385	0.738089	0.991763	Ffar2
ENSRNOG00000019973	352.397	0.0943173	0.210394	0.448288	0.653945	0.991763	Arl3
ENSRNOG00000050395	1.36425	1.18482	2.442	0.485186	0.627544	0.991763	Ms4a6bl
ENSRNOG00000020075	476.572	-0.0583083	0.164463	-0.354537	0.722936	0.991763	Eef1g
ENSRNOG00000067421	0.460249	-2.12805	3.98308	-0.534272	0.593153	0.991763	Meiosin
ENSRNOG00000021062	47.4954	0.453797	0.397114	1.14274	0.253148	0.991763	Fxyd5
ENSRNOG00000026039	5.75371	0.726356	1.17612	0.617589	0.536846	0.991763	Tspan32
ENSRNOG00000030616	8.29391	0.941217	1.22507	0.768297	0.44231	0.991763	Slc25a45
ENSRNOG00000001494	2221.32	0.0677155	0.139861	0.484161	0.628271	0.991763	Napa
ENSRNOG00000037467	0.220873	1.36397	4.07904	0.334385	0.738089	0.991763	Ffar3
ENSRNOG00000014215	785.314	-0.0540434	0.157197	-0.343793	0.731002	0.991763	Klf9
ENSRNOG00000023296	23.3826	0.264224	0.606461	0.435681	0.663068	0.991763	Wtip
ENSRNOG00000019142	3.40093	3.32471	1.66155	2.00097	0.0453955	0.991763	Fas
ENSRNOG00000039955	0.441747	2.44577	4.02396	0.607801	0.543319	0.991763	Samd3
ENSRNOG00000020776	195.216	0.570483	0.224724	2.53859	0.0111299	0.991763	Dhcr7
ENSRNOG00000017198	15.6907	2.69095	0.916163	2.9372	0.00331192	0.991763	Hif3a
ENSRNOG00000020705	13.8332	-0.13948	0.733756	-0.19009	0.849238	0.991763	Rnls
ENSRNOG00000011245	13.1307	0.491153	0.762273	0.644327	0.519363	0.991763	Arhgap18
ENSRNOG00000032677	246.499	0.51519	0.207419	2.48382	0.0129983	0.991763	Tssc4
ENSRNOG00000014907	1.10835	-0.650566	2.88234	-0.225708	0.821429	0.991763	Aldh8a1
ENSRNOG00000015128	389.614	0.102992	0.175778	0.58592	0.557929	0.991763	Sae1
ENSRNOG00000010861	386.916	-0.368431	0.212409	-1.73454	0.0828226	0.991763	Atad1
ENSRNOG00000020457	563.258	0.0539528	0.169391	0.31851	0.750098	0.991763	Tacc2
ENSRNOG00000015229	366.707	0.137315	0.178619	0.768759	0.442036	0.991763	Zc3h4
ENSRNOG00000021053	87.2222	-0.275153	0.30275	-0.908847	0.363431	0.991763	Lsr
ENSRNOG00000020692	33.4617	0.280744	0.463255	0.606025	0.544498	0.991763	Tmem216
ENSRNOG00000015473	13.663	-0.486611	0.709458	-0.68589	0.492782	0.991763	Phactr2
ENSRNOG00000021060	1.05697	0.371106	2.49809	0.148556	0.881904	0.991763	Fam187b
ENSRNOG00000015948	18.2336	0.269816	0.683003	0.395043	0.692811	0.991763	Slc1a5
ENSRNOG00000020873	3.24993	-0.617562	1.69744	-0.363819	0.715993	0.991763	Nphs1
ENSRNOG00000025350	40.8315	0.214153	0.515322	0.415571	0.677724	0.991763	Ppp1r13l
ENSRNOG00000064444	1.26338	0.388549	2.14346	0.181272	0.856154	0.991763
ENSRNOG00000016055	212.478	0.264407	0.209951	1.25937	0.207896	0.991763	Fkrp
ENSRNOG00000012701	526.395	0.124863	0.181584	0.687633	0.491684	0.991763	Map7
ENSRNOG00000045677	0.163464	-0.569836	4.08047	-0.139649	0.888937	0.991763	Nlrp6
ENSRNOG00000016145	1515.62	0.0683835	0.145994	0.468399	0.6395	0.991763	Strn4
ENSRNOG00000017955	40.5048	0.60378	0.445312	1.35586	0.175145	0.991763	Nudt8
ENSRNOG00000020807	14.2325	0.166031	0.769186	0.215853	0.829102	0.991763	Wdr62
ENSRNOG00000046667	25.2475	-0.330685	0.52668	-0.627867	0.530091	0.991763	Fosb
ENSRNOG00000013279	2.00499	0.260245	1.7926	0.145178	0.884571	0.991763	Scd3
ENSRNOG00000047605	82.2092	-0.301614	0.30101	-1.00201	0.316339	0.991763
ENSRNOG00000010117	735.04	-0.101919	0.173827	-0.586322	0.557659	0.991763	Eif3a
ENSRNOG00000018282	523.676	-0.27302	0.156512	-1.7444	0.0810891	0.991763	Gda
ENSRNOG00000013456	229.823	-0.0447205	0.203186	-0.220096	0.825796	0.991763	Ighmbp2
ENSRNOG00000070097	4.90453	0.576403	1.20261	0.479292	0.631731	0.991763
ENSRNOG00000025111	14.552	-0.521387	0.775862	-0.672011	0.501577	0.991763	Nfkbid
ENSRNOG00000049028	25.6341	0.412065	0.530488	0.776767	0.437296	0.991763	C5ar2
ENSRNOG00000024931	29.9085	0.273106	0.459901	0.593837	0.552621	0.991763	Ccdc88b
ENSRNOG00000011720	85.767	-0.27672	0.297171	-0.931181	0.35176	0.991763	L3mbtl3
ENSRNOG00000066925	9.94252	0.552648	0.83701	0.660264	0.509084	0.991763
ENSRNOG00000024278	322.499	0.459644	0.210863	2.17982	0.0292706	0.991763	Rbm42
ENSRNOG00000014132	58.8395	-0.138856	0.384558	-0.36108	0.718039	0.991763	Mypop
ENSRNOG00000019507	466.703	-0.120281	0.190371	-0.631825	0.527502	0.991763	Hnrnpul2
ENSRNOG00000062787	0.163464	-0.569836	4.08047	-0.139649	0.888937	0.991763	Cgm4
ENSRNOG00000070506	114.307	0.288286	0.26379	1.09286	0.274454	0.991763	Chst8
ENSRNOG00000012311	11.3821	-0.574538	0.971773	-0.591226	0.554369	0.991763	Slc35d3
ENSRNOG00000014254	262.312	0.115564	0.209015	0.552898	0.580333	0.991763	Cpt1a
ENSRNOG00000021085	620.151	0.0372172	0.148801	0.250113	0.8025	0.991763	Sf1
ENSRNOG00000020451	19.1655	-0.574602	0.678016	-0.847476	0.39673	0.991763	Cd81
ENSRNOG00000049951	1084.42	0.176691	0.173336	1.01935	0.308036	0.991763	Tmem151a
ENSRNOG00000055934	0.365085	2.19387	4.04579	0.542259	0.58764	0.991763	Dmkn
ENSRNOG00000013422	219.638	-0.105391	0.209429	-0.503233	0.6148	0.991763	Med23
ENSRNOG00000021123	28.9904	0.424635	0.526663	0.806275	0.420085	0.991763
ENSRNOG00000021052	133.616	-0.171943	0.248581	-0.691696	0.489128	0.991763	Patl1
ENSRNOG00000019229	109.167	0.163392	0.286672	0.56996	0.568705	0.991763	Fbl
ENSRNOG00000020845	59.2805	0.693557	0.443076	1.56532	0.117507	0.991763	Tyrobp
ENSRNOG00000020704	40.6477	-0.111809	0.431814	-0.258928	0.795691	0.991763	Tkfc
ENSRNOG00000020849	0.621219	2.98616	3.52296	0.847628	0.396645	0.991763	Hcst
ENSRNOG00000013202	177.473	0.0736173	0.215486	0.341633	0.732627	0.991763	Akap7
ENSRNOG00000067501	459.42	0.170836	0.203393	0.839929	0.400948	0.991763
ENSRNOG00000024331	0.563555	-1.08277	3.4086	-0.31766	0.750743	0.991763	Upk1a
ENSRNOG00000013791	3.20944	0.790089	1.6446	0.480415	0.630932	0.991763	Enpp3
ENSRNOG00000021125	728.247	0.103187	0.166427	0.620017	0.535247	0.991763	Prdx5
ENSRNOG00000015036	86.3086	0.918899	0.312499	2.94048	0.003277	0.991763	Ccn2
ENSRNOG00000013239	508.025	-0.0613098	0.174239	-0.351873	0.724934	0.991763	Tle4
ENSRNOG00000009954	195.767	-0.142419	0.220374	-0.646263	0.518109	0.991763	Cacul1
ENSRNOG00000033235	17.5938	-0.134366	0.635056	-0.211582	0.832433	0.991763	Relb
ENSRNOG00000064373	3.0792	-1.00607	1.67716	-0.599867	0.548595	0.991763	Opa3
ENSRNOG00000013845	67.5625	-0.400418	0.337502	-1.18642	0.235457	0.991763	Mrpl21
ENSRNOG00000064229	0.3951	0.402201	4.07904	0.0986019	0.921454	0.991763
ENSRNOG00000055286	156.377	0.398164	0.243422	1.63569	0.101903	0.991763	Yif1b
ENSRNOG00000020872	1.19017	-0.720808	2.56634	-0.28087	0.77881	0.991763	Cd5
ENSRNOG00000016367	31.5177	0.214234	0.537465	0.3986	0.690188	0.991763	Vasp
ENSRNOG00000045543	48.5184	0.39778	0.373584	1.06477	0.286982	0.991763	Frat2
ENSRNOG00000011134	67.2399	0.324504	0.379803	0.8544	0.392883	0.991763	Lama2
ENSRNOG00000016265	236.337	-0.255745	0.226534	-1.12895	0.25892	0.991763	Acsl5
ENSRNOG00000069626	14.3276	-0.356113	0.747938	-0.476126	0.633984	0.991763	LOC120100308
ENSRNOG00000019964	1470.04	0.146275	0.135742	1.07759	0.281216	0.991763	Taok2
ENSRNOG00000069343	1.34063	4.08569	2.4301	1.68128	0.0927081	0.991763	LOC120100316
ENSRNOG00000021023	1695.52	0.428703	0.19129	2.24112	0.0250184	0.991763	Mag
ENSRNOG00000063303	1.64892	4.37036	2.26724	1.92762	0.0539028	0.991763	LOC120100332
ENSRNOG00000043416	4.68722	1.30048	1.39674	0.931082	0.351811	0.991763	Bcl3
ENSRNOG00000012536	213.513	0.261817	0.243116	1.07692	0.281514	0.991763	Sgms1
ENSRNOG00000054771	1.71556	-2.85254	2.3093	-1.23524	0.216741	0.991763	LOC120100336
ENSRNOG00000013023	314.938	0.210112	0.191323	1.09821	0.272113	0.991763	Nop53
ENSRNOG00000047783	272.951	0.0430185	0.216711	0.198506	0.842649	0.991763	Tmem200a
ENSRNOG00000059451	1.49023	2.00721	2.24865	0.89263	0.372055	0.991763	LOC120100320
ENSRNOG00000069415	3.07182	-0.323449	1.53196	-0.211134	0.832783	0.991763	LOC120100307
ENSRNOG00000064394	41.0209	-0.111493	0.490232	-0.227429	0.82009	0.991763	LOC120100309
ENSRNOG00000064859	3.10147	5.28912	2.00942	2.63217	0.00848426	0.991763	LOC120100323
ENSRNOG00000053726	2.81902	-1.16247	1.62858	-0.713796	0.475353	0.991763	LOC120100335
ENSRNOG00000014671	1.35401	0.866276	2.42165	0.357722	0.720552	0.991763	Tesmin
ENSRNOG00000016756	3.17883	-3.27574	3.89945	-0.840051	0.40088	0.991763	Ptgir
ENSRNOG00000068998	5.55517	1.58714	1.3134	1.20843	0.226883	0.991763	LOC120100321
ENSRNOG00000026848	0.326927	-1.62121	4.02491	-0.402793	0.6871	0.991763	Tex36
ENSRNOG00000020636	156.79	0.28659	0.282061	1.01605	0.309603	0.991763	Spint2
ENSRNOG00000066861	3.95605	0.531909	1.42709	0.372724	0.709354	0.991763	LOC120100329
ENSRNOG00000020715	1276.48	-0.0460599	0.136807	-0.336679	0.736359	0.991763	Ddb1
ENSRNOG00000019220	2.38795	2.9292	2.12792	1.37655	0.16865	0.991763	Rhod
ENSRNOG00000029825	3.61333	-4.04342	1.81265	-2.23066	0.0257034	0.991763
ENSRNOG00000069284	10.6284	-0.193367	1.09307	-0.176903	0.859584	0.991763	LOC120100318
ENSRNOG00000066821	0.296912	0.38621	4.07966	0.0946672	0.924579	0.991763	LOC120100304
ENSRNOG00000064132	115.411	-0.145324	0.306478	-0.474176	0.635375	0.991763
ENSRNOG00000015852	1992.22	-0.0424135	0.126553	-0.335145	0.737516	0.991763	Arhgap35
ENSRNOG00000020676	198.744	0.434139	0.333281	1.30262	0.192704	0.991763	Ppp1r14a
ENSRNOG00000068933	1.09888	-1.4485	2.90713	-0.498259	0.618301	0.991763	Rnu6-28
ENSRNOG00000020250	34.9397	-0.420846	0.459602	-0.915674	0.359838	0.991763	Pcgf6
ENSRNOG00000031700	357.788	0.277959	0.215168	1.29183	0.196417	0.991763	Map3k5
ENSRNOG00000018730	69.5683	0.22722	0.367981	0.617477	0.53692	0.991763	Nectin2
ENSRNOG00000014997	650.786	-0.0454784	0.171271	-0.265535	0.790597	0.991763	Igf2r
ENSRNOG00000020881	110.599	0.117349	0.280307	0.418647	0.675474	0.991763	Frmd8
ENSRNOG00000020201	85.7046	0.25509	0.340117	0.750005	0.453251	0.991763	Yif1a
ENSRNOG00000020687	324.985	0.134415	0.226947	0.592273	0.553668	0.991763	Dpf1
ENSRNOG00000020021	1052.82	0.093282	0.144027	0.647669	0.517199	0.991763	Brsk2
ENSRNOG00000065477	2.13279	0.532398	1.85742	0.286633	0.774393	0.991763	LOC120100470
ENSRNOG00000048848	224.115	0.121295	0.20521	0.591077	0.554469	0.991763	Ccdc9
ENSRNOG00000054954	0.729916	0.730201	3.38275	0.21586	0.829097	0.991763	Lilrb2
ENSRNOG00000017294	309.006	0.064597	0.207844	0.310796	0.755956	0.991763	Zranb1
ENSRNOG00000016219	0.549312	-2.39805	3.70244	-0.647694	0.517183	0.991763	Vnn1
ENSRNOG00000012591	0.399965	-1.94518	4.00144	-0.486121	0.626882	0.991763	Pkd2l1
ENSRNOG00000020989	70.4963	-0.40645	0.361213	-1.12523	0.26049	0.991763	Tm7sf2
ENSRNOG00000013994	23.4288	-0.186786	0.577137	-0.323642	0.746209	0.991763	Enpp1
ENSRNOG00000021057	624.154	0.115887	0.156618	0.739939	0.459337	0.991763	Osbp
ENSRNOG00000057287	0.231637	1.36397	4.07904	0.334385	0.738089	0.991763	LOC120100423
ENSRNOG00000017699	0.326927	-1.62121	4.02491	-0.402793	0.6871	0.991763	Mill1
ENSRNOG00000057762	0.364958	0.402201	4.07904	0.0986019	0.921454	0.991763	Snord14a
ENSRNOG00000018107	453.529	-0.595138	0.219836	-2.70719	0.00678544	0.991763	Zfand5
ENSRNOG00000069776	7.12901	0.527127	1.04506	0.5044	0.61398	0.991763	RGD1563307
ENSRNOG00000015271	38.1964	-0.0985285	0.444947	-0.221438	0.824751	0.991763	Zfp418
ENSRNOG00000011346	53.5564	0.130839	0.434776	0.300935	0.763464	0.991763	Ehd2
ENSRNOG00000054413	0.430107	-2.03897	3.99555	-0.51031	0.609834	0.991763
ENSRNOG00000036576	124.546	-0.190383	0.248537	-0.766013	0.443668	0.991763	Zdhhc6
ENSRNOG00000060256	0.558564	-0.64618	3.75348	-0.172155	0.863316	0.991763
ENSRNOG00000020000	59.3145	0.0689055	0.376039	0.18324	0.854609	0.991763	Tmem219
ENSRNOG00000070002	0.980782	-3.21609	3.27126	-0.983135	0.325541	0.991763	Rnu6-672
ENSRNOG00000066094	11.3861	0.682276	0.74474	0.916126	0.359601	0.991763	LOC691135
ENSRNOG00000045795	269.208	0.268425	0.193442	1.38762	0.165251	0.991763	Gatd1
ENSRNOG00000061526	15.1071	1.5085	0.711482	2.12022	0.0339873	0.991763	Rsph6a
ENSRNOG00000058441	0.133448	1.34798	4.07966	0.330416	0.741086	0.991763	LOC120100478
ENSRNOG00000021133	239.882	-0.0329882	0.193639	-0.17036	0.864727	0.991763	Lsm14a
ENSRNOG00000016625	0.231637	1.36397	4.07904	0.334385	0.738089	0.991763	Slc22a2
ENSRNOG00000067944	0.66262	3.03631	3.79281	0.800543	0.423396	0.991763	LOC120100383
ENSRNOG00000025476	11.2051	-0.50944	0.863392	-0.590044	0.555161	0.991763	Tmem252
ENSRNOG00000021174	73.0788	0.594032	0.313524	1.89469	0.0581333	0.991763	Macrod1
ENSRNOG00000056695	0.817595	3.3402	2.93479	1.13814	0.255063	0.991763	LOC120100442
ENSRNOG00000017002	62.0515	0.448001	0.364795	1.22809	0.219413	0.991763	Adrb1
ENSRNOG00000023863	1.65054	-0.841811	2.10525	-0.399863	0.689257	0.991763	Gpr139
ENSRNOG00000062946	4.81919	-1.23407	1.37292	-0.898866	0.368724	0.991763
ENSRNOG00000021139	10.1063	-0.161492	0.783718	-0.206059	0.836745	0.991763	Esrra
ENSRNOG00000027156	186.341	-0.252428	0.276738	-0.912156	0.361687	0.991763	Morn4
ENSRNOG00000014984	740.625	0.0759056	0.201064	0.377519	0.705788	0.991763	Dmwd
ENSRNOG00000022946	0.133322	-0.569836	4.08047	-0.139649	0.888937	0.991763	Slc22a3
ENSRNOG00000013304	40.127	0.374519	0.420626	0.890383	0.37326	0.991763	Arg1
ENSRNOG00000018978	0.860341	-1.83703	2.89971	-0.63352	0.526394	0.991763	Scart1
ENSRNOG00000020703	2229.71	0.200745	0.133292	1.50606	0.132053	0.991763	Sipa1l3
ENSRNOG00000012514	129.011	-0.22551	0.309626	-0.728328	0.466413	0.991763	Abhd17b
ENSRNOG00000015598	7.12642	-0.867371	0.995933	-0.870913	0.383802	0.991763	Zfp772
ENSRNOG00000042786	171.203	-0.132198	0.260575	-0.507334	0.61192	0.991763	Vti1a
ENSRNOG00000070315	3.05367	-2.29319	1.81869	-1.2609	0.207346	0.991763	LOC120100291
ENSRNOG00000069514	4.21018	2.53841	1.5383	1.65013	0.0989157	0.991763	LOC120100270
ENSRNOG00000015085	0.558564	-0.64618	3.75348	-0.172155	0.863316	0.991763	Dmpk
ENSRNOG00000068948	0.48777	2.63077	3.8868	0.676847	0.498503	0.991763	LOC120100282
ENSRNOG00000064681	5.81999	0.119313	1.18747	0.100477	0.919966	0.991763	LOC120100249
ENSRNOG00000059386	116.099	0.218976	0.347832	0.629543	0.528994	0.991763	Nudt19
ENSRNOG00000064306	0.220873	1.36397	4.07904	0.334385	0.738089	0.991763	LOC120100242
ENSRNOG00000017326	196.892	0.0955986	0.228138	0.419039	0.675188	0.991763	Ctbp2
ENSRNOG00000016411	21.2831	-0.620189	0.585349	-1.05952	0.289363	0.991763	Rps12
ENSRNOG00000063743	2.93509	-2.25678	1.77068	-1.27453	0.202477	0.991763	LOC120100253
ENSRNOG00000021090	279.351	0.101864	0.221102	0.460711	0.645006	0.991763	Pygm
ENSRNOG00000071006	1.56936	2.01501	2.32206	0.867767	0.385522	0.991763	LOC120100235
ENSRNOG00000014173	327.558	-0.160979	0.180218	-0.893249	0.371724	0.991763	Smc3
ENSRNOG00000020941	149.479	0.569141	0.242091	2.35094	0.0187259	0.991763	Psenen
ENSRNOG00000065738	0.84761	2.10014	2.96219	0.708982	0.478335	0.991763	LOC120100315
ENSRNOG00000029399	76.4868	0.280864	0.346948	0.809526	0.418212	0.991763	Bcam
ENSRNOG00000062905	6.00701	-0.911019	1.20497	-0.75605	0.449619	0.991763	LOC120100269
ENSRNOG00000018553	1438.82	0.10431	0.148916	0.700462	0.483639	0.991763	Pitpnm1
ENSRNOG00000069190	0.400092	-0.409008	4.04662	-0.101074	0.919492	0.991763	LOC120100239
ENSRNOG00000020247	2481.92	0.227816	0.162713	1.4001	0.161482	0.991763	Cnih2
ENSRNOG00000067483	15.7594	0.705014	0.659758	1.06859	0.285252	0.991763
ENSRNOG00000017223	1.56008	-0.254969	1.98844	-0.128225	0.897971	0.991763	Plg
ENSRNOG00000068769	2.81173	5.14494	1.9379	2.65491	0.00793294	0.991763	LOC120100275
ENSRNOG00000064470	3.10085	4.26074	1.84192	2.3132	0.0207115	0.991763	LOC120100261
ENSRNOG00000060933	3.239	1.52517	1.43469	1.06307	0.287752	0.991763	LOC120100285
ENSRNOG00000016448	185.536	0.244108	0.229522	1.06355	0.287533	0.991763	Eef2k
ENSRNOG00000057912	7.80536	-0.699262	1.02686	-0.680971	0.49589	0.991763	LOC120100283
ENSRNOG00000015406	81.4773	0.540602	0.318514	1.69726	0.089647	0.991763	Pgm5
ENSRNOG00000027459	165.059	0.0704611	0.266739	0.264158	0.791658	0.991763	Zbtb45
ENSRNOG00000067875	14.2883	-1.02969	0.673032	-1.52993	0.126035	0.991763	LOC120100274
ENSRNOG00000015670	445.633	-0.315334	0.190705	-1.65352	0.0982256	0.991763	Stx7
ENSRNOG00000022289	276.819	0.285392	0.212107	1.3455	0.178462	0.991763	Aip
ENSRNOG00000061412	7.54869	-0.456596	0.917928	-0.497421	0.618893	0.991763	LOC120100290
ENSRNOG00000058715	4.414	-1.05425	1.28746	-0.818861	0.412866	0.991763	LOC120100264
ENSRNOG00000020935	33.7905	0.0697859	0.450816	0.154799	0.87698	0.991763	Capn1
ENSRNOG00000019202	13.2608	0.627971	0.732746	0.857011	0.391439	0.991763	Pvr
ENSRNOG00000025245	134.235	-0.417033	0.291045	-1.43288	0.151891	0.991763	RGD1311946
ENSRNOG00000018018	1300.27	0.14669	0.149767	0.979457	0.327354	0.991763	Kcnip2
ENSRNOG00000068901	5.44324	-1.57707	1.15592	-1.36434	0.172461	0.991763	LOC120100279
ENSRNOG00000020996	367.872	0.19962	0.190572	1.04748	0.294878	0.991763	Vps51
ENSRNOG00000062886	1.3566	2.9806	2.31647	1.2867	0.198199	0.991763	LOC120100313
ENSRNOG00000066651	1.55401	-2.68785	2.38655	-1.12625	0.26006	0.991763	Or5a3
ENSRNOG00000062579	0.326927	-1.62121	4.02491	-0.402793	0.6871	0.991763	LOC120100243
ENSRNOG00000027487	809.476	0.136619	0.154275	0.885554	0.375858	0.991763	Trim28
ENSRNOG00000020784	1.35849	-2.46258	2.49708	-0.986185	0.324042	0.991763	Kcnk7
ENSRNOG00000071174	6.84965	0.757076	1.09581	0.690882	0.48964	0.991763	LOC120100258
ENSRNOG00000068398	1.25632	0.795998	2.34645	0.339235	0.734433	0.991763	LOC120100286
ENSRNOG00000070897	17.8226	0.192216	0.645772	0.297652	0.765969	0.991763	Rab1b
ENSRNOG00000065172	5.55047	1.74596	1.21468	1.43738	0.15061	0.991763	LOC120100314
ENSRNOG00000020957	11.9522	0.391056	0.748616	0.522372	0.601411	0.991763	Igflr1
ENSRNOG00000052664	1456.81	-0.318244	0.162565	-1.95764	0.0502721	0.991763	Tnks2
ENSRNOG00000012782	188	-0.330648	0.282648	-1.16982	0.242072	0.991763	Cemip2
ENSRNOG00000022153	101.113	0.0605085	0.269971	0.22413	0.822657	0.991763	Tmem134
ENSRNOG00000043328	325.513	0.0546366	0.202268	0.270119	0.787069	0.991763	Chmp2a
ENSRNOG00000012142	0.133322	-0.569836	4.08047	-0.139649	0.888937	0.991763	Glyat
ENSRNOG00000012346	467.405	-0.278807	0.187535	-1.4867	0.137095	0.991763	Epb41l2
ENSRNOG00000020299	1530.62	-0.0443069	0.142419	-0.311102	0.755723	0.991763	Klc2
ENSRNOG00000027514	790.744	-0.0183585	0.155833	-0.117809	0.906219	0.991763	Ube2m
ENSRNOG00000055525	423.778	0.140996	0.179399	0.785934	0.431906	0.991763	Kmt2b
ENSRNOG00000027550	63.3668	0.415141	0.34857	1.19098	0.23366	0.991763	Mzf1
ENSRNOG00000020620	17.2655	-0.119703	0.681982	-0.175522	0.86067	0.991763	Ppp1r32
ENSRNOG00000018086	36.7984	-0.581145	0.426098	-1.36387	0.172607	0.991763	Slc22a8
ENSRNOG00000013387	26.2101	0.216627	0.7126	0.303996	0.761131	0.991763	Tpcn2
ENSRNOG00000064524	0.60521	1.47829	3.64023	0.406097	0.684671	0.991763
ENSRNOG00000015232	284.335	0.117914	0.196695	0.599477	0.548855	0.991763	Pip5k1b
ENSRNOG00000024309	410.326	0.329348	0.212222	1.5519	0.120686	0.991763	Cox6b1
ENSRNOG00000048337	102.518	-0.102538	0.269225	-0.380863	0.703305	0.991763
ENSRNOG00000054618	0.163464	-0.569836	4.08047	-0.139649	0.888937	0.991763
ENSRNOG00000017448	18.3158	0.132181	0.595492	0.221969	0.824338	0.991763	Exoc3l2
ENSRNOG00000022428	412.488	-0.0817945	0.181442	-0.450803	0.652131	0.991763	Flrt1
ENSRNOG00000020350	714.959	0.0170161	0.162594	0.104654	0.916651	0.991763	Pacs1
ENSRNOG00000011815	713.166	0.157671	0.536034	0.294144	0.768648	0.991763	Sgk1
ENSRNOG00000017463	40.9101	0.587165	0.432068	1.35896	0.174158	0.991763	Bloc1s3
ENSRNOG00000021573	1389.52	0.0321245	0.153451	0.209347	0.834178	0.991763	Dpy19l3
ENSRNOG00000017468	25.5289	-0.601252	0.53784	-1.1179	0.263609	0.991763	Trappc6a
ENSRNOG00000019266	101.805	0.475813	0.336513	1.41395	0.157376	0.991763	Tmem223
ENSRNOG00000043378	42.2152	0.649201	0.464364	1.39804	0.1621	0.991763	Nkpd1
ENSRNOG00000013565	162.469	-0.0668435	0.232933	-0.286965	0.774139	0.991763	Zfp507
ENSRNOG00000020409	4.71697	1.76618	1.23367	1.43165	0.152244	0.991763
ENSRNOG00000019341	16.1126	0.438657	0.673328	0.651476	0.514739	0.991763	Tmem179b
ENSRNOG00000070696	0.163464	-0.569836	4.08047	-0.139649	0.888937	0.991763
ENSRNOG00000070767	18.4739	0.123495	0.603006	0.204798	0.83773	0.991763
ENSRNOG00000022044	2.80153	-0.37645	1.48606	-0.25332	0.800021	0.991763	Cabp4
ENSRNOG00000019965	88.9574	-0.143651	0.380933	-0.377104	0.706096	0.991763	Tgfb1i1
ENSRNOG00000017692	617.665	0.181057	0.178815	1.01254	0.31128	0.991763	Ppp1r37
ENSRNOG00000017980	17.4925	-0.447927	0.612176	-0.731697	0.464353	0.991763	Itgal
ENSRNOG00000036615	0.69491	3.09785	3.72359	0.831952	0.405436	0.991763	Cfap95
ENSRNOG00000057645	4.61773	1.19553	1.5047	0.79453	0.426887	0.991763	Micb
ENSRNOG00000019419	94.9538	0.04444	0.32604	0.136302	0.891583	0.991763	Taf6l
ENSRNOG00000036622	0.133322	-0.569836	4.08047	-0.139649	0.888937	0.991763	Glyatl1
ENSRNOG00000020552	57.5034	0.586597	0.40444	1.45039	0.146949	0.991763	Fosl1
ENSRNOG00000021097	3.18219	0.816681	1.42957	0.571277	0.567812	0.991763	Hpn
ENSRNOG00000037931	2.52364	-1.30347	1.82794	-0.713085	0.475793	0.991763	Plaur
ENSRNOG00000047061	6.71607	0.479373	1.03029	0.465279	0.641732	0.991763	Zfp773-ps1
ENSRNOG00000016627	40.0684	-0.885378	0.422185	-2.09713	0.0359818	0.991763	Eya4
ENSRNOG00000021828	611.89	0.0968966	0.189822	0.51046	0.609729	0.991763	Coro1b
ENSRNOG00000017064	1.09001	2.54406	2.94033	0.865231	0.386912	0.991763	Tdrd1
ENSRNOG00000043486	1.43329	-1.16327	2.48553	-0.468016	0.639773	0.991763	Tnfrsf26
ENSRNOG00000016280	589.726	0.194424	0.15046	1.2922	0.196288	0.991763	Btrc
ENSRNOG00000046222	5.30922	-1.14248	1.15177	-0.991938	0.321228	0.991763	Ceacam4
ENSRNOG00000063861	0.138663	-0.569836	4.08047	-0.139649	0.888937	0.991763
ENSRNOG00000016883	73.6468	0.166845	0.334247	0.499165	0.617663	0.991763	Entpd7
ENSRNOG00000024065	20.0417	-0.409615	0.593813	-0.689805	0.490317	0.991763	Zfp575
ENSRNOG00000012122	234.097	-0.0721154	0.219805	-0.328088	0.742845	0.991763	Clvs2
ENSRNOG00000063690	2.86242	0.264908	1.51233	0.175166	0.860949	0.991763
ENSRNOG00000025581	1.63803	3.27315	2.34141	1.39794	0.162131	0.991763	Vwa2
ENSRNOG00000013847	633.024	-0.18418	0.170638	-1.07936	0.280427	0.991763	Nova2
ENSRNOG00000048495	193.131	0.430474	0.26082	1.65047	0.0988476	0.991763	Rrp12
ENSRNOG00000067152	0.653854	-2.63042	3.81333	-0.689794	0.490324	0.991763
ENSRNOG00000020388	408.012	0.0482409	0.196706	0.245244	0.806268	0.991763	Inpp5f
ENSRNOG00000013965	58.0372	-0.217253	0.376853	-0.576493	0.564282	0.991763	Noc3l
ENSRNOG00000029608	275.936	-0.373254	0.204493	-1.82526	0.0679617	0.991763	Nkain2
ENSRNOG00000067512	8.51036	0.590719	0.988426	0.597636	0.550083	0.991763
ENSRNOG00000017419	414.142	0.132931	0.161645	0.822361	0.410872	0.991763	Map3k4
ENSRNOG00000021102	2106.07	-0.195574	0.141491	-1.38223	0.166901	0.991763	Scn1b
ENSRNOG00000014928	1016.91	0.0795892	0.14364	0.554089	0.579518	0.991763	Apba1
ENSRNOG00000015465	6.6285	1.39257	1.17354	1.18664	0.235369	0.991763	Cep72
ENSRNOG00000058291	1.23016	-2.43897	2.60696	-0.935558	0.349501	0.991763
ENSRNOG00000014786	43.8801	-0.267046	0.396964	-0.672721	0.501125	0.991763	Ccne1
ENSRNOG00000019596	204.972	0.0939214	0.232623	0.40375	0.686397	0.991763	Smg9
ENSRNOG00000017230	163.285	0.234097	0.25248	0.927189	0.353828	0.991763	Cox15
ENSRNOG00000014485	135.995	-0.354986	0.316703	-1.12088	0.26234	0.991763	Pdcd6
ENSRNOG00000021098	38.5694	0.104289	0.42871	0.243263	0.807802	0.991763	Rasgrp2
ENSRNOG00000051051	73.5131	-0.299116	0.323447	-0.924778	0.355081	0.991763	Pabir1
ENSRNOG00000011584	118.881	-0.309029	0.298094	-1.03669	0.299882	0.991763	Gpatch1
ENSRNOG00000024243	1248.77	0.177639	0.175939	1.00966	0.312658	0.991763	Cadm4
ENSRNOG00000015912	588.428	0.142741	0.161659	0.882977	0.377249	0.991763	Ptdss2
ENSRNOG00000020598	11.0821	0.177536	0.767187	0.231412	0.816995	0.991763	Kcnk6
ENSRNOG00000028247	296.855	0.114237	0.187871	0.608064	0.543145	0.991763	Ankrd13d
ENSRNOG00000013331	1596.31	0.123831	0.137437	0.901004	0.367586	0.991763	Sdha
ENSRNOG00000036592	48.9474	-0.518541	0.439345	-1.18026	0.237897	0.991763	Zfp518a
ENSRNOG00000062907	0.133322	-0.569836	4.08047	-0.139649	0.888937	0.991763
ENSRNOG00000021067	208.743	0.0477747	0.247494	0.193033	0.846933	0.991763	Fxyd7
ENSRNOG00000019862	0.231637	1.36397	4.07904	0.334385	0.738089	0.991763	Pinlyp
ENSRNOG00000021175	108.128	0.0807595	0.331454	0.243652	0.8075	0.991763	Otub1
ENSRNOG00000018137	281.414	0.0934643	0.184688	0.506066	0.612811	0.991763	Tubgcp2
ENSRNOG00000021644	26.4931	0.150963	0.589507	0.256083	0.797887	0.991763	Slc15a3
ENSRNOG00000014163	413.339	0.118721	0.180538	0.657596	0.510798	0.991763	Zfp536
ENSRNOG00000057569	866.739	0.175356	0.150511	1.16507	0.24399	0.991763	Ahnak
ENSRNOG00000019915	210.518	0.216721	0.237754	0.911532	0.362015	0.991763	Xrcc1
ENSRNOG00000017164	73.1263	-0.390248	0.34257	-1.13918	0.254629	0.991763	Afap1l2
ENSRNOG00000020781	207.533	0.324584	0.244352	1.32835	0.184064	0.991763	Tbcb
ENSRNOG00000021338	1225.72	0.0538262	0.157824	0.341051	0.733065	0.991763	Tmem132a
ENSRNOG00000032042	266.373	-0.0443374	0.205965	-0.215266	0.82956	0.991763	Zfta
ENSRNOG00000061774	2.7848	-0.288236	1.62894	-0.176947	0.85955	0.991763	RGD1560986
ENSRNOG00000014190	43.1586	0.138866	0.419862	0.330741	0.74084	0.991763	Hint3
ENSRNOG00000018985	1203.03	-0.0368532	0.141379	-0.260669	0.794348	0.991763	Grk2
ENSRNOG00000068291	0.673383	3.05259	3.43971	0.887457	0.374833	0.991763	Or5an10
ENSRNOG00000020799	79.8361	0.590715	0.375516	1.57307	0.115702	0.991763	Polr2i
ENSRNOG00000036641	0.66187	0.309276	3.01527	0.10257	0.918304	0.991763	LOC689065
ENSRNOG00000022485	119.237	-0.169635	0.301303	-0.563003	0.573433	0.991763	Chuk
ENSRNOG00000062751	1.98364	2.38658	2.18358	1.09296	0.27441	0.991763	Ovol3
ENSRNOG00000069113	244.547	0.801345	0.320081	2.50357	0.0122948	0.991763	Rpl26-ps2
ENSRNOG00000066174	4.15134	-1.16834	1.43894	-0.811944	0.416824	0.991763
ENSRNOG00000018272	31.9205	0.302143	0.556839	0.542605	0.587402	0.991763	Zfp511
ENSRNOG00000066988	12.4986	-0.525417	0.710422	-0.739584	0.459553	0.991763	Tbpl1
ENSRNOG00000024677	483.322	0.133378	0.191013	0.698266	0.485011	0.991763	Arhgap33
ENSRNOG00000016416	313.401	0.35068	0.186293	1.88241	0.0597802	0.991763	Rnh1
ENSRNOG00000011114	2.74359	-1.27799	1.75732	-0.727237	0.467081	0.991763
ENSRNOG00000030572	194.759	-0.119897	0.258163	-0.464422	0.642346	0.991763	Smc5
ENSRNOG00000017731	508.635	0.112031	0.182608	0.613508	0.539541	0.991763	Agpat4
ENSRNOG00000021202	3288.53	-0.230737	0.139861	-1.64976	0.098992	0.991763	Rtn3
ENSRNOG00000011161	41.4875	0.454972	0.412546	1.10284	0.270097	0.991763	Slc2a12
ENSRNOG00000017302	0.133448	1.34798	4.07966	0.330416	0.741086	0.991763	Slc6a3
ENSRNOG00000017298	28.7681	-0.645756	0.481818	-1.34025	0.180164	0.991763	Cutc
ENSRNOG00000013364	23.4633	-0.531386	0.586107	-0.906636	0.364599	0.991763	Hey2
ENSRNOG00000021137	173.916	0.256881	0.232613	1.10433	0.26945	0.991763	Kctd15
ENSRNOG00000011568	28.6863	-0.516967	0.485448	-1.06493	0.286908	0.991763	Rspo3
ENSRNOG00000036598	72.9857	-0.104748	0.326694	-0.320631	0.74849	0.991763	Tbc1d12
ENSRNOG00000014240	10.8582	-1.16219	0.827833	-1.40389	0.160351	0.991763	Trmt11
ENSRNOG00000020394	142.925	-0.256916	0.239211	-1.07401	0.282816	0.991763	Mcmbp
ENSRNOG00000057578	1.39239	-1.14799	2.47225	-0.464349	0.642397	0.991763	Prodh2
ENSRNOG00000019968	794.374	-0.116135	0.154132	-0.753477	0.451163	0.991763	Trim8
ENSRNOG00000063244	305.965	-0.244843	0.199597	-1.22669	0.21994	0.991763	Mpeg1
ENSRNOG00000021144	168.447	-0.304092	0.230681	-1.31824	0.187425	0.991763
ENSRNOG00000032706	4.82301	0.304617	1.48798	0.204718	0.837792	0.991763	Kcnk18
ENSRNOG00000011588	289.131	0.0985963	0.221959	0.44421	0.656891	0.991763	Rnf146
ENSRNOG00000018337	582.099	0.0308501	0.172315	0.179033	0.857912	0.991763	Caly
ENSRNOG00000028017	145.454	0.309706	0.234983	1.31799	0.187507	0.991763	Tmem109
ENSRNOG00000020514	143.15	-0.0990007	0.272705	-0.363033	0.71658	0.991763	Sox6
ENSRNOG00000018237	227.729	0.141798	0.212727	0.666573	0.505045	0.991763	Gstp1
ENSRNOG00000011622	60.6223	0.0468701	0.472086	0.099283	0.920914	0.991763	Echdc1
ENSRNOG00000019112	1.0571	1.20486	2.67969	0.449624	0.652981	0.991763	Chp2
ENSRNOG00000021119	28.4227	-0.169686	0.483304	-0.351096	0.725516	0.991763	Pdcd2l
ENSRNOG00000019311	23.9679	0.466933	0.623367	0.74905	0.453827	0.991763	Nfkb2
ENSRNOG00000067490	1.73539	1.56275	1.9281	0.810515	0.417644	0.991763
ENSRNOG00000055547	104.905	0.224555	0.298165	0.753122	0.451376	0.991763	Prkn
ENSRNOG00000021086	154.745	0.0997687	0.266616	0.374203	0.708253	0.991763	Dtx4
ENSRNOG00000013938	141.744	-0.386911	0.324796	-1.19124	0.233558	0.991763	Tshz3
ENSRNOG00000016253	0.266643	-1.36505	4.04744	-0.337263	0.735919	0.991763	Slc6a18
ENSRNOG00000061597	2.62708	2.19403	1.78376	1.23	0.218696	0.991763	LOC100912336
ENSRNOG00000012458	0.558564	-0.64618	3.75348	-0.172155	0.863316	0.991763	Cyp2e1
ENSRNOG00000064485	15.1899	0.200118	0.658212	0.304033	0.761103	0.991763	Znf431l-ps8
ENSRNOG00000019435	3177.95	0.0836493	0.147664	0.566483	0.571065	0.991763	Psd
ENSRNOG00000024266	39.1997	0.233969	0.419318	0.557974	0.576862	0.991763	Haus5
ENSRNOG00000017414	147.498	-0.41472	1.33233	-0.311274	0.755593	0.991763	Irf7
ENSRNOG00000068028	2.26862	4.86294	2.45266	1.98272	0.0473991	0.991763
ENSRNOG00000066874	36.0228	-0.158343	0.464276	-0.341054	0.733063	0.991763
ENSRNOG00000018860	49.421	0.657574	0.38284	1.71762	0.085866	0.991763	Mtg1
ENSRNOG00000016960	173.019	-0.099957	0.22186	-0.45054	0.652321	0.991763	Polr3e
ENSRNOG00000042309	335.099	-0.244858	0.208477	-1.17451	0.240192	0.991763	Kiaa0408L
[truncated: 19,444 more rows]
